# Supplementary material for: A highly anisotropic family of hexagonal bipyramidal Dy(iii) unsaturated 18-crown-6 complexes exceeding the blockade barrier over 2700 K: a computational exploration
Source: Royal Society of Chemistry journal article supplement (doi:10.1039/d4dt00632a), 2024-01-01
Supplement: d4dt00632a1.pdf [file d4dt00632a1.pdf]

## SUPPORTING INFORMATION

# **A Highly Anisotropic Family of Hexagonal Bipyramidal Dy(III) Unsaturated 18-Crown-6 Complexes Exceeding Blockade Barrier over 2700K: A Computational Exploration**

*Shruti Moorthy, Ibtesham Tarannum<sup>§</sup>, Kusum Kumari<sup>§</sup> and Saurabh Kumar Singh<sup>\*</sup>*

---

*Department of Chemistry, Indian Institute of Technology, Hyderabad Kandi, Sangareddy, Telangana, India, 502284*

*E-mail: [sksingh@chy.iith.ac.in](mailto:sksingh@chy.iith.ac.in)*

*<sup>§</sup>authors contributed equally*

# SUPPORTING INFORMATION

## Table of Contents

|                                                                                                                                                                                                                                                                                                                                                                                                                                                                                                                                                                                              |    |
|----------------------------------------------------------------------------------------------------------------------------------------------------------------------------------------------------------------------------------------------------------------------------------------------------------------------------------------------------------------------------------------------------------------------------------------------------------------------------------------------------------------------------------------------------------------------------------------------|----|
| <b>Computational Details</b> .....                                                                                                                                                                                                                                                                                                                                                                                                                                                                                                                                                           | 4  |
| <b>Scheme 1.</b> (a) Overlay plots of the X-ray crystal structure (in red) and the DFT-optimised structures (in yellow) (b) Correlation between the bond lengths in DFT optimised and X-Ray crystal structure in a series of Dy(III) complexes; (c) Correlation between the bond angles in DFT optimised and X-Ray crystal structure in a series of Dy(III) complexes The red line represents the linear fit obtained between the DFT optimised and crystal structure values, while the blue line represents the ideal 1:1 correspondence between the experimental and computed values ..... | 7  |
| <b>Table S2:</b> DFT optimized low-lying conformers of the $[\text{Dy}(\text{18C6})\text{Cl}_2]^+$ along with their absolute SCF electronic energy, enthalpy (H) and Gibbs free energy (G) .....                                                                                                                                                                                                                                                                                                                                                                                             | 10 |
| <b>Table S3:</b> Continuous Shape Measure (CShM) analysis for Dy(III) ions in complexes $\mathbf{1}_X\text{-}\mathbf{5}_X$ .....                                                                                                                                                                                                                                                                                                                                                                                                                                                             | 11 |
| <b>Figure S1:</b> Molecular Electrostatic Maps/(MEP) plots for complexes $\mathbf{1}_X\text{-}\mathbf{5}_X$ . The red and blue colours represent the most electronegative and electropositive regions, respectively. ....                                                                                                                                                                                                                                                                                                                                                                    | 12 |
| <b>Energy Decomposition Analysis</b> .....                                                                                                                                                                                                                                                                                                                                                                                                                                                                                                                                                   | 12 |
| <b>Table S4:</b> EDA analysis for complexes $\mathbf{1}_X\text{-}\mathbf{5}_X$ . All the values provided here are in the kcal/mol. ....                                                                                                                                                                                                                                                                                                                                                                                                                                                      | 13 |
| <b>Table S5:</b> Contribution (%) of decomposition energies to Total Binding Energy for complexes $\mathbf{1}_X\text{-}\mathbf{5}_X$ .....                                                                                                                                                                                                                                                                                                                                                                                                                                                   | 14 |
| <b>Figure S2:</b> (a) and (b) DFT computed trends in the total binding energy; (c) and (d) the percentage contribution of the decomposition energies to the total binding energy for $\mathbf{1}_X$ and $\mathbf{2}_X$ , respectively. ....                                                                                                                                                                                                                                                                                                                                                  | 14 |
| <b>Table S6:</b> The EDA-NOCV results of complexes $\mathbf{1}_X\text{-}\mathbf{2}_X$ with different electronic states of fragments at the PBE0- D3(BJ) level. All the values provided here are in the kcal/mol. ....                                                                                                                                                                                                                                                                                                                                                                        | 15 |
| <b>Table S7:</b> The shape of the first three highest electron deformation densities, $\Delta E_{\text{orb}(1-3)}$ at the PBE0-D3(BJ) level for complexes $\mathbf{1}_X\text{-}\mathbf{2}_X$ . Isosurface values are 0.0002 au. The direction of the charge flow of the deformation densities is from red to blue. The $\Delta E_{\text{orb}}$ energies are in kcal/mol. The eigenvalues $v_i$ give the size of the charge migration. ....                                                                                                                                                   | 15 |
| <b>Table S8:</b> NBO computed Natural Population Analysis and the NPA Charges of the Dy and O/S centres of complexes $\mathbf{1}_X\text{-}\mathbf{2}_X$ .....                                                                                                                                                                                                                                                                                                                                                                                                                                | 18 |
| <b>Figure S3:</b> Selected bond parameters and CASSCF computed Mulliken Charges (inset) on the first coordination sphere atoms for $[\text{Dy}(\text{U18C6})\text{Cl}_2]^+$ (left) and $[\text{Dy}(\text{18C6})\text{Cl}_2]^+$ (right) along with select bond parameters. Color code Cyan (Dy), Red (O), Dark green (Cl), Grey (C), White (H). ....                                                                                                                                                                                                                                          | 18 |
| <b>Figure S4:</b> AILFT computed splitting pattern of 4f orbitals in the complex $[\text{Dy}(\text{18C6})\text{Cl}_2]^+$ and $[\text{Dy}(\text{U18C6})\text{Cl}_2]^+$ series. ....                                                                                                                                                                                                                                                                                                                                                                                                           | 19 |
| <b>Table S9:</b> CASSCF-SO computed electronic states along with the corresponding g-tensor values for $[\text{Dy}(\text{18C6})\text{Cl}_2]^+$ (saturated $\mathbf{1}_{\text{Cl}}$ ), $[\text{Dy}(\text{U18C6})\text{Cl}_2]^+$ ( $\mathbf{1}_{\text{Cl}}$ ), saturated $\mathbf{2}_{\text{Cl}}$ and $\mathbf{2}_{\text{Cl}}$ . All the energies are reported in $\text{cm}^{-1}$ . ....                                                                                                                                                                                                      | 19 |
| <b>Figure S5:</b> CASSCF computed main magnetic axis ( $g_{zz}$ ) in complexes $\mathbf{1}_X\text{-}\mathbf{5}_X$ . The dotted blue lines denotes orientation of the main magnetic anisotropy axis ( $g_{zz}$ ). Color code Cyan (Dy), Red (O), Yellow (S), Orange (Se), Light Green (F), Dark green (Cl), Brown (Br), Violet(I), Grey (C), White (H). ....                                                                                                                                                                                                                                  | 21 |
| <b>Figure S6:</b> CASSCF computed Mulliken Charges for the atoms in the first coordination sphere for complexes $\mathbf{1}_X\text{-}\mathbf{5}_X$ . Color code Cyan (Dy), Red (O), Yellow (S), Orange (Se), Light Green (F), Dark green (Cl), Brown (Br), Violet(I), Grey (C), White (H). ....                                                                                                                                                                                                                                                                                              | 23 |
| <b>Ab initio ligand field theory (AILFT) analysis</b> .....                                                                                                                                                                                                                                                                                                                                                                                                                                                                                                                                  | 23 |

## SUPPORTING INFORMATION

|                                                                                                                                                                                                                                                                                                                                                                                                                                                                                                                                                                                                                                                  |    |
|--------------------------------------------------------------------------------------------------------------------------------------------------------------------------------------------------------------------------------------------------------------------------------------------------------------------------------------------------------------------------------------------------------------------------------------------------------------------------------------------------------------------------------------------------------------------------------------------------------------------------------------------------|----|
| <b>Table S10:</b> AILFT computed the Slater Condon parameters $F^2$ , $F^4$ , and $F^6$ , the one-electron effective parameters for spin-orbit coupling ( $\zeta$ ) for complexes $1_X$ - $5_X$ along with their % reduction at the CASSCF level of theory. All the values provided here are in the $\text{cm}^{-1}$ .....                                                                                                                                                                                                                                                                                                                       | 25 |
| <b>Table S11:</b> AILFT computed the Racah parameters $E^1$ , $E^2$ , and $E^3$ for complexes $1_X$ - $5_X$ along with their % reduction at the CASSCF level of theory. All the values provided here are in the $\text{cm}^{-1}$ .....                                                                                                                                                                                                                                                                                                                                                                                                           | 25 |
| <b>Figure S7:</b> AILFT-CASSCF computed trends in Slater Condon parameters (a) $F^2$ , (b) $F^4$ (c) $F^6$ and (d) $\zeta$ for complexes $1_X$ - $2_X$ series.....                                                                                                                                                                                                                                                                                                                                                                                                                                                                               | 26 |
| <b>Figure S8:</b> AILFT computed splitting pattern of $4f$ orbitals in the complex $1_X$ and $2_X$ series. ....                                                                                                                                                                                                                                                                                                                                                                                                                                                                                                                                  | 27 |
| <b>Figure S9:</b> SINGLE_ANISO computed blockade barrier for the complexes (a) $1_F$ (b) $1_{Cl}$ (c) $1_{Br}$ (d) $1_I$ (e) $2_F$ (f) $2_{Cl}$ (g) $2_{Br}$ (h) $2_I$ (i) $3_{Cl}$ (j) $4_{Cl}$ (k) $5_{Cl}$ . The bold black lines denote the states which are placed according to the values of their magnetic moments. The horizontal lines denote the tunnelling transitions within each doublet state, and the non-horizontal lines correspond to the spin-phonon transition paths. <sup>19</sup> The color intensity of the lines correlates to the amplitude of the averaged transition moments connecting the corresponding states..... | 28 |
| <b>Table S12.</b> Calculated $U_{\text{eff}}$ (in $\text{cm}^{-1}$ ) as well as the theoretically predicted three most important excited KDs.....                                                                                                                                                                                                                                                                                                                                                                                                                                                                                                | 29 |
| <b>Figure S10:</b> (a) Temperature dependence of calculated $U_{\text{eff}}$ for $[\text{Dy}(\text{18C6})\text{Cl}_2]^+$ , (b) relative contribution of each Kramer's doublet to the relaxation calculated as $k_i(T)/N_k$ . ....                                                                                                                                                                                                                                                                                                                                                                                                                | 29 |
| <b>Figure S11:</b> (a)-(d) Temperature dependence of calculated $U_{\text{eff}}$ for $1_F$ , $1_{Cl}$ , $1_{Br}$ and $1_I$ (right) and relative contribution of each Kramer's doublet to the relaxation calculated as $k_i(T)/N_k$ (left).....                                                                                                                                                                                                                                                                                                                                                                                                   | 30 |
| <b>Figure S12:</b> (a)-(d) Temperature dependence of calculated $U_{\text{eff}}$ for $2_F$ , $2_{Cl}$ , $2_{Br}$ and $2_I$ (right) and relative contribution of each Kramer's doublet to the relaxation calculated as $k_i(T)/N_k$ (left).....                                                                                                                                                                                                                                                                                                                                                                                                   | 31 |
| <b>Magnetic anisotropy calculations in model complexes with bulky axial ligands</b> .....                                                                                                                                                                                                                                                                                                                                                                                                                                                                                                                                                        | 32 |
| <b>Figure S13:</b> (a) Structure of model complex $2_{\text{OSiPh}_3}$ (right) and SINGLE_ANISO computed blockade barrier (left), (b) Structure of model complex $2_{\text{OtBu}}$ (right) and SINGLE_ANISO computed blockade barrier (left). (c) and (d) Temperature dependence of calculated $U_{\text{eff}}$ for $2_{\text{OSiPh}_3}$ , $2_{\text{OtBu}}$ (right) and relative contribution of each Kramer's doublet to the relaxation calculated as $k_i(T)/N_k$ (left). Color code Cyan (Dy), Red (O), Yellow (S), Pink (Si), Grey (C), White (H). ....                                                                                     | 34 |
| <b>Figure S14.</b> SINGLE_ANISO computed span of the eight KDs for complexes $1_X$ and $2_X$ . The bold arrows indicate the probable relaxation pathway.....                                                                                                                                                                                                                                                                                                                                                                                                                                                                                     | 35 |
| <b>Table S13.</b> SINGLE_ANISO computed wave function decomposition analysis for the Dy(III) centre. The major dominating values are kept in bold. ....                                                                                                                                                                                                                                                                                                                                                                                                                                                                                          | 36 |
| <b>Table S14:</b> CASSCF-SO computed electronic states along with the corresponding g-tensor values for complexes $1_X$ . All the energies are reported in $\text{cm}^{-1}$ . ....                                                                                                                                                                                                                                                                                                                                                                                                                                                               | 38 |
| <b>Table S15:</b> CASSCF-SO computed electronic states along with the corresponding g-tensor values for complexes $2_X$ . All the energies are reported in $\text{cm}^{-1}$ . ....                                                                                                                                                                                                                                                                                                                                                                                                                                                               | 39 |
| <b>Table S16:</b> CASSCF-SO computed electronic states along with the corresponding g-tensor values for complex $3_{Cl}$ . All the energies are reported in $\text{cm}^{-1}$ .....                                                                                                                                                                                                                                                                                                                                                                                                                                                               | 40 |
| <b>Table S17:</b> CASSCF-SO computed electronic states along with the corresponding g-tensor values for complexes $4_{Cl}$ and $5_{Cl}$ . All the energies are reported in $\text{cm}^{-1}$ .....                                                                                                                                                                                                                                                                                                                                                                                                                                                | 40 |
| <b>Table S18:</b> CASSCF-SO computed electronic states along with the corresponding g-tensor values for complexes $2_{\text{OSiPh}_3}$ and $2_{\text{OtBu}}$ . All the energies are reported in $\text{cm}^{-1}$ . ....                                                                                                                                                                                                                                                                                                                                                                                                                          | 41 |
| <b>Table S19:</b> SINGLE_ANISO computed crystal field parameters for $1_X$ - $5_X$ . ....                                                                                                                                                                                                                                                                                                                                                                                                                                                                                                                                                        | 41 |
| <b>Table S20:</b> Selected structural parameters of reported Dy(III) based SMMs .....                                                                                                                                                                                                                                                                                                                                                                                                                                                                                                                                                            | 45 |

## SUPPORTING INFORMATION

|                                        |    |
|----------------------------------------|----|
| <b>DFT Optimised Coordinates</b> ..... | 45 |
| <b>Input Files</b> .....               | 55 |
| <b>References</b> .....                | 66 |

# SUPPORTING INFORMATION

## Computational Details

### 1. Geometry Optimization:

The gas phase geometry optimizations were carried out using ORCA 5.0.3<sup>1</sup> code at the BP86 level of theory for all the mononuclear complexes<sup>2,3</sup>. The dispersion corrections were accounted for by using Grimme's dispersion with Becke-Johnson (D3BJ) method incorporated in ORCA.<sup>4</sup> The BP86 level of theory has been robust in the geometry optimization of mononuclear lanthanide and actinide complexes.<sup>5-8</sup> For the Dy atom, core electrons were replaced by def2-ECP pseudopotential (for 28 core electrons,  $l_{max}=5$ ), while TZVP were used to treat the valence electrons. For O, S, Se, F, Cl, Br, we have used the def2-TZVP basis set, while Sapporo-TZP basis sets were used for the I atom.<sup>9</sup> For all the C and H atoms, we have used the def2-SVP basis set.<sup>10</sup> Vibrational frequency calculations show no negative frequency, thus confirming the stationary point as the local minima. A very tight SCF ( $1 \times 10^{-8}E_h$ ) criterion was chosen for energy minimization. The “*slowconv*” and “*KDIIS*” criteria and large integration grid settings (GRID9 for Dy) were turned on throughout the calculations for smooth convergence.

To assess the reliability of our computational methodology in predicting the structural parameters, we have optimized twelve different mononuclear Dy(III) complexes for which the X-ray crystal structure is reported. DFT-optimized geometry nicely reproduces the X-ray structural parameters (see the overlay of experimental and DFT-optimized geometry in Scheme S1(a)). One-to-one comparison of relevant bond lengths (Dy-ligand) and bond angles between the DFT optimized and X-ray structure shows a near-linear correlation with an R-value and slope value of 0.92-0.95, highlighting the robustness of our computational methodology in predicting the structures.(see Scheme S1 (b) and (c))

# SUPPORTING INFORMATION

(a)

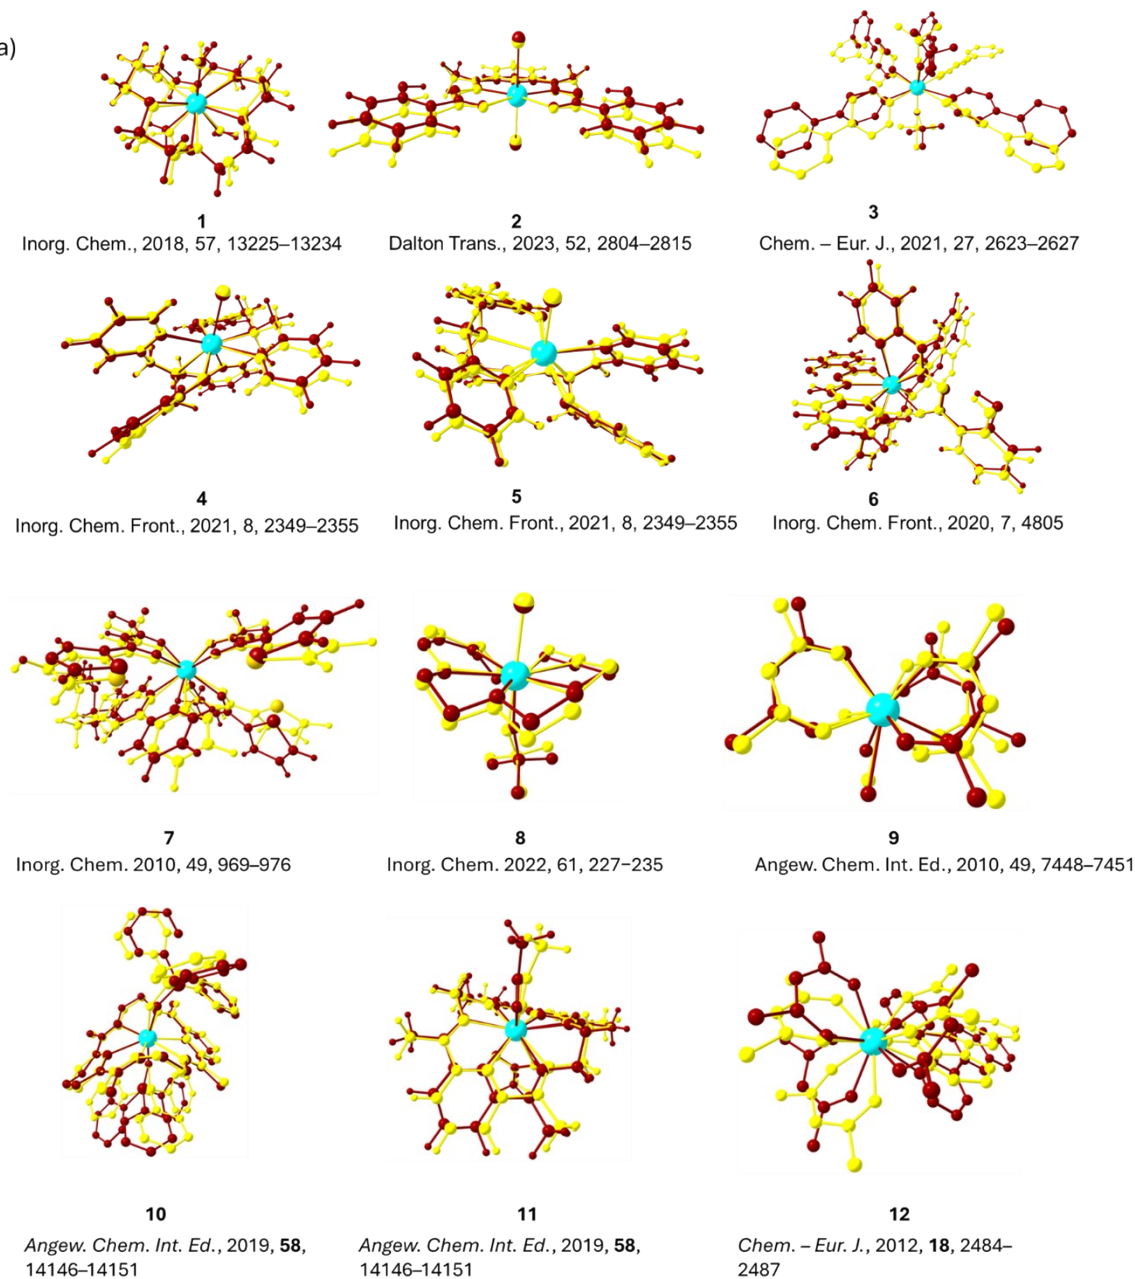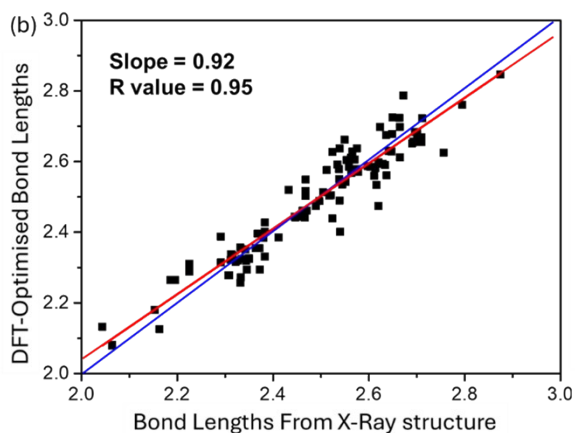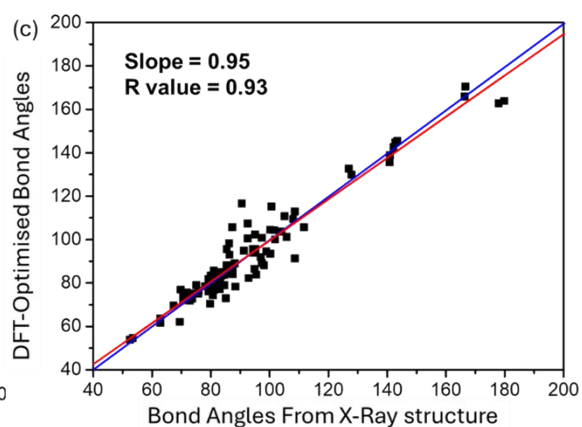

## SUPPORTING INFORMATION

**Scheme 1.** (a) Overlay plots of the X-ray crystal structure (in red) and the DFT-optimised structures (in yellow) (b) Correlation between the bond lengths in DFT optimised and X-Ray crystal structure in a series of Dy(III) complexes; (c) Correlation between the bond angles in DFT optimised and X-Ray crystal structure in a series of Dy(III) complexes The red line represents the linear fit obtained between the DFT optimised and crystal structure values, while the blue line represents the ideal 1:1 correspondence between the experimental and computed values.

### **Conformational Search**

First, we have performed the conformational search analysis using the xTB CREST4 code.<sup>11</sup> The key procedure implemented in CREST is a conformational search workflow abbreviated as iMTD-GC. The iMTD-GC workflow generates conformer/rotamer ensembles (CREs) by extensive meta-dynamic sampling (MTD) based on an additional genetic z-matrix crossing (GC) step at the end. CRE is the thermally accessible ensemble of minimum-energy structures consisting of conformers as well as rotamers. The conformational search was carried out in an energy window of  $\sim 10$  kJ/mole. Here, we have carried out CREST calculations on eleven mononuclear Dy(III) complexes with the general formula  $[\text{Dy}(\text{U}18\text{C}6)\text{X}_2]^+$  (where  $\text{U}18\text{C}6 = [\text{C}_{12}\text{H}_{12}\text{O}_6]$  (**1**),  $[\text{C}_{12}\text{H}_{12}\text{S}_6]$  (**2**),  $[\text{C}_{12}\text{H}_{12}\text{Se}_6]$  (**3**),  $[\text{C}_{12}\text{H}_{12}\text{O}_4\text{S}_2]$  (**4**),  $[\text{C}_{12}\text{H}_{12}\text{O}_4\text{Se}_2]$  (**5**) and  $\text{X} = \text{F}, \text{Cl}, \text{Br}, \text{I}$  as an axial ligand) and the saturated analogue of **1**<sub>Cl</sub>. Conformational analysis of  $\{\text{DyX}_2\}$  encapsulated in the unsaturated 18-crown-6 ligands yields a single conformer for all the complexes **1**<sub>X</sub>-**5**<sub>X</sub>. In all the eleven complexes, we observed that the unsaturated 18-crown-6 ligand occupies the equatorial positions while the X atoms occupy the axial position, resulting in a hexagonal bipyramidal geometry around the Dy(III) ion. Contrarily, we observed 14 different conformers for the saturated analogue of the **1**<sub>Cl</sub>  $[\text{Dy}(18\text{C}6)\text{Cl}_2]^+$  analogue within the  $\sim 10$  kJ/mol. All the obtained conformers were optimized at the DFT level of theory to find the lowest energy structure.

### **2. Energy Decomposition Analysis and ETS-NOCV Analysis:**

To further understand the nature of bonding in all the eleven complexes and the saturated analogue of **1**<sub>Cl</sub>, we have carried out an energy decomposition analysis (EDA) using the ADF 2021 code. All these calculations were carried out in a scalar relativistic framework using hybrid PBE0 functional<sup>12</sup>, where scalar relativistic effects were modelled by zeroth-order relativistic approximation (ZORA) as implemented in ADF.

## SUPPORTING INFORMATION

[13] Slater-type all electron TZP basis set for Dy atom and DZP basis set for the remaining atoms, with "no frozen core" approximation. Grimme's D3 empirical corrections with Becke–Johnson damping (D3BJ) were applied to incorporate dispersion corrections.<sup>4</sup> All these calculations were conducted in the gas phase. Natural Bonding Orbital (NBO) analysis has been carried out using Weinhold's NBO 6.0 code implemented in the ADF 2021 code to assess the natural population analysis and bonding interactions.<sup>13</sup>

### **3. Magnetic Anisotropy and Ab Initio Ligand Field Theory Calculations**

Complete-active space self-consistent field (CASSCF) calculations<sup>14</sup> were performed on DFT-optimized lowest energy structures of all the complexes to assess the magnetic properties. For these calculations, we employed DKH-adapted def2-TZVP for O, S, Se, F, Cl, Br, Sapporo-DKH-TZP for the I atom<sup>9</sup> and all-electron SARC-DKH-TZVP basis set for Dy(III) centre.<sup>15</sup> The Dy(III) ion has a  ${}^6\text{H}_{15/2}$  ground state with an  $f^9$  configuration, and we have constructed an active space of nine active electrons in seven active  $4f$ - orbitals, i.e. CAS(9,7). Using this active space, we have computed 21 sextets and 224 quartets and performed the spin-orbit calculations using the spin-orbit mean field (SOMF-IX) operator and second-order Douglas–Kroll–Hess (DKH2) method. The computed spin-free energy and spin-orbit energies are provided in Table S14-S19. Ab initio ligand field theory (AILFT) calculations were performed at the CASSCF levels of theory to estimate the interelectronic repulsion in terms of Slater–Condon parameters and one electron energies to represent the  $f$ -orbital splitting.<sup>16</sup> Next, we used standalone SINGLE\_ANISO module code to extract the  $g$ -values of the low-lying Kramer doublets, crystal field parameters, wave function decomposition analysis and constructed the *ab-initio blockage barrier* by computing the transverse magnetic moment between each KD, which gives us the probability of magnetic relaxation from a given KD.

#### **Effective energy demagnetization barrier ( $U_{\text{eff}}$ )**

We have computed the effective energy demagnetization barriers  $U_{\text{eff}}$  for the Orbach relaxation process, using the method previously published by Aravena et al., in ref<sup>17</sup>, which utilize the energy of the eight Kramer's doublets and the magnetic transition dipole moment related to the transition between the respective KDs (i.e.  $+1 \rightarrow -1$ ) from the CAS(9,7) calculations. This method involves the use of the following formula,



## SUPPORTING INFORMATION

$$U_{eff}(T) = \sum_{i=1}^M \frac{k_i(T)}{N_k} E_i$$

Here, M denotes the number of KDs,  $k_i$  denotes the demagnetization rates of the KDs of energies  $E_i$ ,  $N_k$  a normalization factor for  $k_i$ .

$$k_i(T) = \frac{\exp\left(-\frac{\varepsilon}{k_B T}\right)}{Z} k_{QT,i}$$

$k_B$  is the Boltzmann constant,  $k_{QT,i}$  represent the magnetic transition dipole moment and T and Z are the temperature and the partition function, respectively. The computed  $U_{eff}$  values are tabulated in Table 1. As proposed earlier by Aravena et al.,<sup>18</sup> the blocking temperatures can be estimated by dividing the computed energy barrier by a factor of 28, which nicely correlates with the experimental values quite well. The blocking temperatures reported in Table 1 are estimated using this approach.

## SUPPORTING INFORMATION

**Table S1:** Selected structural parameters of complexes **1<sub>X</sub>-5<sub>X</sub>**.

| Complex                                                                                            | Label                 | Avg. Dy-L <sub>eq</sub> (Å) | Avg. Dy-X (Å) | ∠X-Dy-X (°) |
|----------------------------------------------------------------------------------------------------|-----------------------|-----------------------------|---------------|-------------|
| [Dy(C <sub>2</sub> H <sub>2</sub> O) <sub>6</sub> F <sub>2</sub> ] <sup>+</sup>                    | <b>1<sub>F</sub></b>  | 2.673                       | 2.029         | 150.2       |
| [Dy(C <sub>2</sub> H <sub>2</sub> O) <sub>6</sub> Cl <sub>2</sub> ] <sup>+</sup>                   | <b>1<sub>Cl</sub></b> | 2.641                       | 2.507         | 162.9       |
| [Dy(C <sub>2</sub> H <sub>2</sub> O) <sub>6</sub> Br <sub>2</sub> ] <sup>+</sup>                   | <b>1<sub>Br</sub></b> | 2.639                       | 2.670         | 163.4       |
| [Dy(C <sub>2</sub> H <sub>2</sub> O) <sub>6</sub> I <sub>2</sub> ] <sup>+</sup>                    | <b>1<sub>I</sub></b>  | 2.630                       | 2.896         | 167.4       |
| [Dy(C <sub>2</sub> H <sub>2</sub> S) <sub>6</sub> F <sub>2</sub> ] <sup>+</sup>                    | <b>2<sub>F</sub></b>  | 3.185                       | 2.031         | 150.6       |
| [Dy(C <sub>2</sub> H <sub>2</sub> S) <sub>6</sub> Cl <sub>2</sub> ] <sup>+</sup>                   | <b>2<sub>Cl</sub></b> | 3.167                       | 2.541         | 174.1       |
| [Dy(C <sub>2</sub> H <sub>2</sub> S) <sub>6</sub> Br <sub>2</sub> ] <sup>+</sup>                   | <b>2<sub>Br</sub></b> | 3.162                       | 2.695         | 179.8       |
| [Dy(C <sub>2</sub> H <sub>2</sub> S) <sub>6</sub> I <sub>2</sub> ] <sup>+</sup>                    | <b>2<sub>I</sub></b>  | 3.155                       | 2.912         | 179.9       |
| [Dy(C <sub>2</sub> H <sub>2</sub> Se) <sub>6</sub> Cl <sub>2</sub> ] <sup>+</sup>                  | <b>3<sub>Cl</sub></b> | 3.335                       | 2.542         | 169.2       |
| [Dy(C <sub>12</sub> H <sub>12</sub> S <sub>2</sub> O <sub>4</sub> )Cl <sub>2</sub> ] <sup>+</sup>  | <b>4<sub>Cl</sub></b> | 2.970(S) / 2.802(O)         | 2.552         | 152.5       |
| [Dy(C <sub>12</sub> H <sub>12</sub> Se <sub>2</sub> O <sub>4</sub> )Cl <sub>2</sub> ] <sup>+</sup> | <b>5<sub>Cl</sub></b> | 3.103(Se) / 2.777(O)        | 2.512         | 156.4       |

**Table S2:** DFT optimized low-lying conformers of the [Dy(18C6)Cl<sub>2</sub>]<sup>+</sup> along with their absolute SCF electronic energy, enthalpy (H) and Gibbs free energy (G)

| Conformer | SCF Electronic Energy (kcal/mol) | H (kcal/mol)     | G (kcal/mol)     |
|-----------|----------------------------------|------------------|------------------|
| <b>1</b>  | -2728.302                        | -2728.301        | -2728.381        |
| <b>2</b>  | <b>-2728.310</b>                 | <b>-2728.309</b> | <b>-2728.389</b> |
| <b>3</b>  | -2728.306                        | -2728.305        | -2728.383        |
| <b>4</b>  | -2728.305                        | -2728.304        | -2728.383        |
| <b>5</b>  | -2728.310                        | -2728.309        | -2728.387        |
| <b>6</b>  | -2728.307                        | -2728.306        | -2728.385        |
| <b>7</b>  | -2728.306                        | -2728.305        | -2728.383        |
| <b>8</b>  | -2728.310                        | -2728.309        | -2728.388        |
| <b>9</b>  | -2728.310                        | -2728.309        | -2728.387        |
| <b>10</b> | -2728.307                        | -2728.306        | -2728.384        |
| <b>11</b> | -2728.306                        | -2728.305        | -2728.383        |
| <b>12</b> | -2728.309                        | -2728.308        | -2728.387        |
| <b>13</b> | -2728.309                        | -2728.308        | -2728.387        |
| <b>14</b> | -2728.306                        | -2728.305        | -2728.381        |

*the lowest energy conformer has been made bold*

## SUPPORTING INFORMATION

**Table S3:** Continuous Shape Measure (CShM) analysis for Dy(III) ions in complexes **1<sub>x</sub>-5<sub>x</sub>**

|                       | OP-8   | HPY-8  | <b>HBPY-8</b> | CU-8   | SAPR-8 | TDD-8  | JGBF-8 | JETBPY-8 | JBTPR-8 | BTPR-8 | JSD-8  | TT-8   | ETBPY-8 |
|-----------------------|--------|--------|---------------|--------|--------|--------|--------|----------|---------|--------|--------|--------|---------|
| <b>1<sub>F</sub></b>  | 30.148 | 16.958 | <b>2.314</b>  | 11.040 | 17.946 | 15.530 | 9.924  | 23.882   | 16.969  | 16.750 | 17.292 | 11.831 | 22.050  |
| <b>1<sub>Cl</sub></b> | 30.782 | 19.578 | <b>0.756</b>  | 9.093  | 16.184 | 13.840 | 8.543  | 24.234   | 15.772  | 15.095 | 16.221 | 9.875  | 20.645  |
| <b>1<sub>Br</sub></b> | 31.198 | 20.135 | <b>0.697</b>  | 8.913  | 16.014 | 13.648 | 8.906  | 24.635   | 15.828  | 14.952 | 16.503 | 9.697  | 20.598  |
| <b>1<sub>I</sub></b>  | 32.042 | 21.832 | <b>0.753</b>  | 8.760  | 16.129 | 13.586 | 9.167  | 25.698   | 16.145  | 15.011 | 17.176 | 9.584  | 21.235  |
| <b>2<sub>F</sub></b>  | 29.323 | 17.753 | <b>3.825</b>  | 12.713 | 19.959 | 17.728 | 11.749 | 24.762   | 18.542  | 18.932 | 18.559 | 13.269 | 23.842  |
| <b>2<sub>Cl</sub></b> | 30.254 | 20.772 | <b>0.918</b>  | 9.655  | 18.836 | 16.164 | 10.506 | 25.489   | 17.975  | 17.737 | 18.693 | 10.280 | 23.447  |
| <b>2<sub>Br</sub></b> | 31.127 | 21.843 | <b>0.474</b>  | 9.132  | 18.926 | 16.217 | 10.337 | 26.143   | 18.317  | 17.948 | 18.986 | 9.815  | 23.827  |
| <b>2<sub>I</sub></b>  | 31.692 | 22.466 | <b>0.146</b>  | 8.686  | 18.622 | 15.866 | 10.558 | 26.510   | 18.276  | 17.682 | 19.131 | 9.383  | 23.671  |
| <b>3<sub>Cl</sub></b> | 29.771 | 19.921 | <b>1.472</b>  | 10.226 | 19.002 | 16.471 | 10.684 | 25.188   | 17.800  | 17.752 | 18.537 | 10.691 | 23.476  |
| <b>4<sub>Cl</sub></b> | 28.908 | 16.854 | <b>3.279</b>  | 11.636 | 15.825 | 14.183 | 6.721  | 22.080   | 14.520  | 13.504 | 13.888 | 12.384 | 18.073  |
| <b>5<sub>Cl</sub></b> | 29.207 | 17.586 | <b>3.248</b>  | 11.605 | 15.971 | 14.416 | 6.331  | 22.798   | 14.623  | 13.981 | 13.852 | 12.339 | 18.458  |

*Determined Geometry: HBPY-8*

OP-8, D<sub>8h</sub>, Octagon; HPY-8, C<sub>7v</sub>, Heptagonal pyramid; HBPY-8, D<sub>6h</sub>, Hexagonal bipyramid; CU-8, O<sub>h</sub>, Cube; SAPR-8, D<sub>4d</sub>, Square antiprism; TDD-8, D<sub>2d</sub>, Triangular dodecahedron; JGBF-8, D<sub>2d</sub>, Johnson gyrobifastigium J26; JETBPY-8, D<sub>3h</sub>, Johnson elongated triangular bipyramid J14; JBTPR8, C<sub>2v</sub>, Biaugmented trigonal prism J50; BTPR-8, C<sub>2v</sub>, Biaugmented trigonal prism; JSD-8, D<sub>2d</sub>, Snub diphenoid J84; TT-8, T<sub>d</sub>, Triakis tetrahedron; ETBPY-8, D<sub>3h</sub>, Elongated trigonal bipyramid.

## SUPPORTING INFORMATION

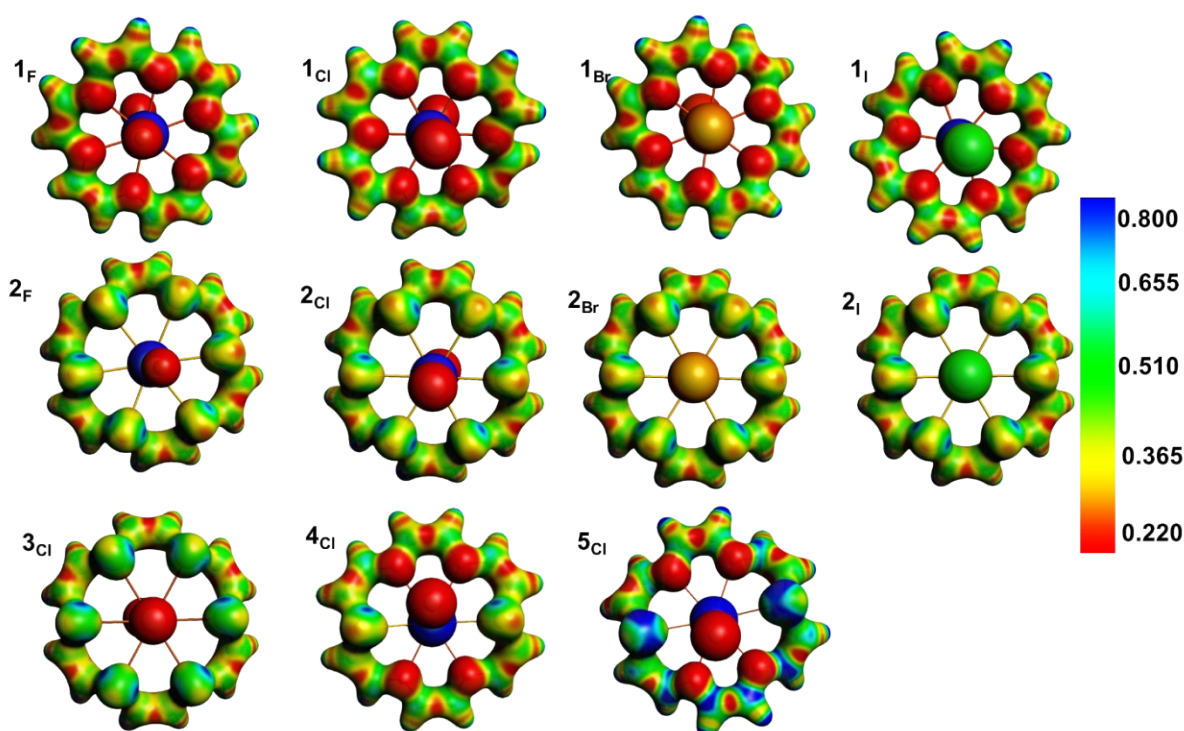

**Figure S1:** Molecular Electrostatic Maps/(MEP) plots for complexes **1<sub>X</sub>-5<sub>X</sub>**. The red and blue colours represent the most electronegative and electropositive regions, respectively.

### Energy Decomposition Analysis

Energy Decomposition analysis was carried out on all the complexes of **1<sub>X</sub>-5<sub>X</sub>** to understand the nature of interaction bonding interaction by preparing the two fragments {DyX<sub>2</sub>} and the {U18C6}. The total interaction energy ( $\Delta E_{\text{int}}$ ) of a complex can be defined as the difference in energies between the complex and individual fragments as  $\Delta E_{\text{int}} = E_{\text{complex}} - (E_{\text{DyX}_2} + E_{\text{U18C6}})$ , which can be further decomposed in terms of electrostatic interaction, Pauli repulsion, orbital interactions, and dispersion interaction energies as follows:

$$\Delta E_{\text{int}} = \Delta E_{\text{Elstat}} + \Delta E_{\text{pauli}} + \Delta E_{\text{orbital}} + \Delta E_{\text{disp}}$$

where the term  $\Delta E_{\text{Elstat}}$  corresponds to the electrostatic interaction between metal and ligands (which is attractive in nature),  $\Delta E_{\text{Pauli}}$  refers to the Pauli repulsion energy,  $\Delta E_{\text{orbital}}$  accounts for orbital interactions resulting from electron pair bonding, charge transfer and polarization terms, and  $\Delta E_{\text{disp}}$  represents the dispersion interaction terms.

Fig. S2 and Tables S4-S5 show the trend in the binding energy for all eleven complexes. EDA analysis predicts the following trend in the  $\Delta E_{\text{int}}$  value for **1<sub>X</sub>** series **1<sub>F</sub> < 1<sub>Cl</sub> ~ 1<sub>Br</sub> ~ 1<sub>I</sub>** and for **2<sub>X</sub>**:

## SUPPORTING INFORMATION

$2_F < 2_{Cl} \sim 2_{Br} \sim 2_I$ , with the  $1_X$  series complexes lower binding energy compared to  $2_X$  family of complexes. Within each series, we can see that the -F analogue has the lowest  $\Delta E_{int}$  value, while the -Cl, -Br and -I analogues have nearly the same values. In both the  $1_X$  and  $2_X$  families of complexes, the decomposed energies show that the electrostatic and orbital interactions sharply increase as we move from -F to -Cl analogues and remain constant for heavier halides. In the  $1_X$  family of complexes, we have noticed that the most significant contribution to binding energy emerges from the electrostatic interactions, which nearly contribute  $\sim 70\%$  of the total binding energy, followed by orbital interactions contributing  $\sim 62\%$  of the total binding energy. On the other hand, as we move  $1_X$ - $2_X$  complexes, we observed that orbital interaction dominates electrostatic interactions and contributes  $\sim 75\%$  of the total binding energy compared to the  $\sim 60\%$  contribution from the electrostatic interactions. As we move from oxa to the thia crown complexes, the electrostatic interaction decreases significantly due to a decrease in the electronegativity as we move down from O to S/Se atom (see Fig S1). Contrarily, the strength of the orbital interaction marginally increases as we move from O to S/Se, which is rooted back to weak lanthanide-ligand covalency. In all the studied complexes, the Pauli interactions are always positive, and we observed a following trend in the  $\Delta E_{Pauli}$  value:  $I > Br > Cl > F$ . Finally, the dispersion interaction stabilises all complexes by  $\sim 8$  to  $15 \text{ kcal mol}^{-1}$ , contributing  $< 10\%$  of the total binding energy.

**Table S4:** EDA analysis for complexes  $1_X$ - $5_X$ . All the values provided here are in the kcal/mol.

| Complexes          | $E_{Pauli}$ | $E_{Estat}$ | $E_{Orb}$ | $E_{Disp}$ | $E_{Int}$ | %Covalency |
|--------------------|-------------|-------------|-----------|------------|-----------|------------|
| $1_F$              | 48.1        | -94.6       | -83.1     | -8.5       | -138.1    | 46.7       |
| $1_{Cl}$           | 60.7        | -106.2      | -99.6     | -11.6      | -156.6    | 48.4       |
| $1_{Br}$           | 65.7        | -108.1      | -101.3    | -12.7      | -156.4    | 48.4       |
| $1_I$              | 77.1        | -116.3      | -102.1    | -14.2      | -155.5    | 46.8       |
| $2_F$              | 54.9        | -72.6       | -85.1     | -10.4      | -113.3    | 54.0       |
| $2_{Cl}$           | 62.1        | -79.6       | -104.9    | -14.3      | -136.8    | 56.9       |
| $2_{Br}$           | 66.0        | -81.6       | -106.0    | -15.8      | -137.4    | 56.5       |
| $2_I$              | 79.2        | -91.3       | -110.0    | -17.9      | -139.9    | 54.7       |
| $3_{Cl}$           | 58.0        | -77.6       | -107.3    | -14.5      | -141.4    | 58.0       |
| $4_{Cl}$           | 70.6        | -99.4       | -100.3    | -12.7      | -141.8    | 50.2       |
| $5_{Cl}$           | 58.0        | -77.6       | -107.3    | -14.5      | -141.4    | 58.0       |
| $[Dy(18C6)Cl_2]^+$ | 90.34       | -164.31     | -129.61   | -13.86     | -217.44   | 44.1       |

## SUPPORTING INFORMATION

**Table S5:** Contribution (%) of decomposition energies to Total Binding Energy for complexes **1<sub>X</sub>**-**5<sub>X</sub>**.

| Complexes                                   | $E_{\text{Pauli}}$ (%) | $E_{\text{Elstat}}$ (%) | $E_{\text{Orb}}$ (%) | $E_{\text{Disp}}$ (%) |
|---------------------------------------------|------------------------|-------------------------|----------------------|-----------------------|
| <b>1<sub>F</sub></b>                        | -34.8                  | 68.5                    | 60.1                 | 6.1                   |
| <b>1<sub>Cl</sub></b>                       | -38.8                  | 67.8                    | 63.6                 | 7.4                   |
| <b>1<sub>Br</sub></b>                       | -42.0                  | 69.1                    | 64.8                 | 8.1                   |
| <b>1<sub>I</sub></b>                        | -49.5                  | 74.8                    | 65.7                 | 9.1                   |
| <b>2<sub>F</sub></b>                        | -48.4                  | 64.1                    | 75.1                 | 9.2                   |
| <b>2<sub>Cl</sub></b>                       | -45.4                  | 58.2                    | 76.7                 | 10.5                  |
| <b>2<sub>Br</sub></b>                       | -48.0                  | 59.4                    | 77.2                 | 11.5                  |
| <b>2<sub>I</sub></b>                        | -56.6                  | 65.2                    | 78.6                 | 12.8                  |
| <b>3<sub>Cl</sub></b>                       | -41.1                  | 54.9                    | 75.9                 | 10.2                  |
| <b>4<sub>Cl</sub></b>                       | -49.8                  | 70.1                    | 70.7                 | 9.0                   |
| <b>5<sub>Cl</sub></b>                       | -41.1                  | 54.9                    | 75.9                 | 10.2                  |
| <b>[Dy(18C6)Cl<sub>2</sub>]<sup>+</sup></b> | -41.5                  | 75.6                    | 59.6                 | 6.4                   |

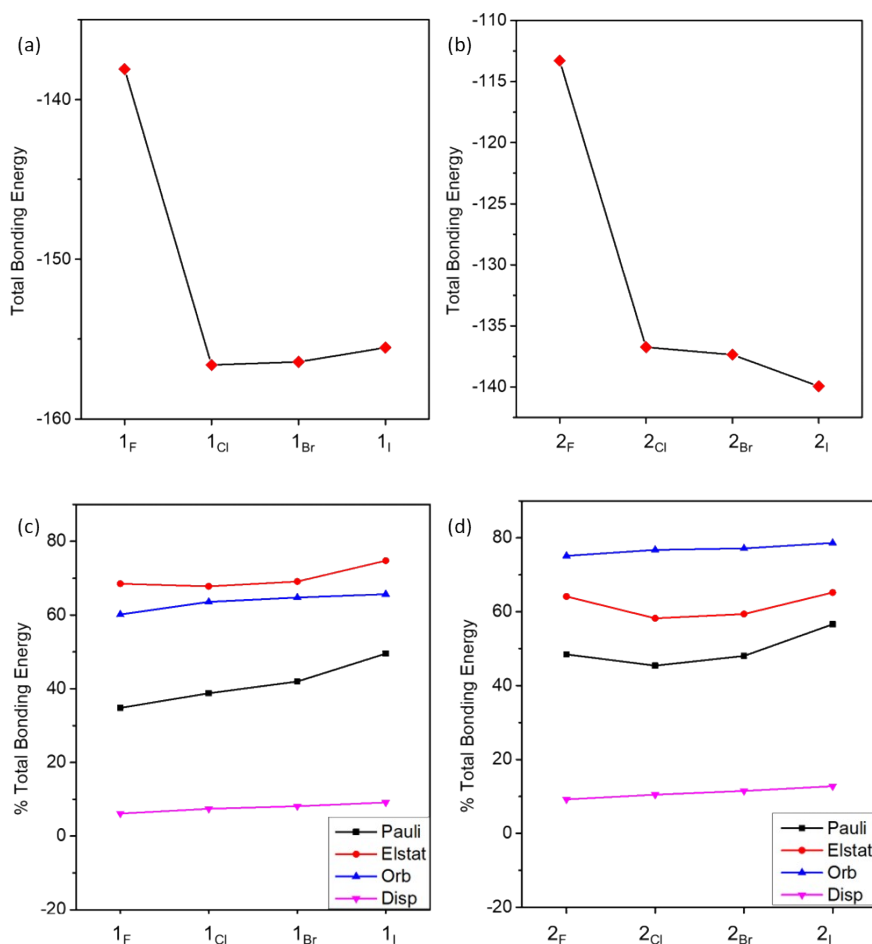

**Figure S2:** (a) and (b) DFT computed trends in the total binding energy; (c) and (d) the percentage contribution of the decomposition energies to the total binding energy for **1<sub>X</sub>** and **2<sub>X</sub>**, respectively.

## SUPPORTING INFORMATION

**Table S6:** The EDA-NOCV results of complexes  $1_X-2_X$  with different electronic states of fragments at the PBE0- D3(BJ) level. All the values provided here are in the kcal/mol.

| Energy                                                  | $1_F$  | $1_{Cl}$ | $1_{Br}$ | $1_I$  | $2_F$  | $2_{Cl}$ | $2_{Br}$ | $2_I$  |
|---------------------------------------------------------|--------|----------|----------|--------|--------|----------|----------|--------|
| $\Delta E_{Pauli}$                                      | 48.1   | 60.7     | 65.7     | 77.1   | 54.9   | 62.1     | 66.0     | 79.2   |
| $\Delta E_{elstat}$                                     | -94.6  | -106.2   | -108.1   | -116.3 | -72.6  | -79.6    | -81.6    | -91.3  |
| $\Delta E_{orb}$                                        | -83.1  | -99.6    | -101.3   | -102.1 | -85.1  | -104.9   | -106.0   | -110.0 |
| $\Delta E_{disp}$                                       | -8.5   | -11.6    | -12.7    | -14.2  | -10.4  | -14.3    | -15.8    | -17.9  |
| $\Delta E_{int}$                                        | -138.1 | -156.6   | -156.4   | -155.5 | -113.3 | -136.8   | -137.4   | -139.9 |
| <i>ETS-NOCV Decomposed Orbital Interaction Energies</i> |        |          |          |        |        |          |          |        |
| $\Delta E_{orb(1)}$                                     | -5.5   | -6.5     | -6.5     | -6.4   | -9.9   | -11.4    | -11.3    | -11.6  |
| $\Delta E_{orb(2)}$                                     | -5.2   | -6.6     | -6.6     | -6.0   | -7.7   | -9.8     | -9.8     | -10.1  |
| $\Delta E_{orb(3)}$                                     | -5.5   | -6.1     | -6.2     | -5.8   | -7.4   | -9.9     | -9.9     | -9.9   |
| Total<br>$\Delta E_{orb}$                               | -16.2  | -19.2    | -19.3    | -18.2  | -25.0  | -31.1    | -31.0    | -31.6  |
| Total<br>$\Delta E_{orb}$<br>(as % $E_{int}$ )          | 11.8   | 12.2     | 12.4     | 11.7   | 22.0   | 22.8     | 22.6     | 22.6   |

**Table S7:** The shape of the first three highest electron deformation densities,  $\Delta E_{orb(1)-(3)}$  at the PBE0-D3(BJ) level for complexes  $1_X-2_X$ . Isosurface values are 0.0002 au. The direction of the charge flow of the deformation densities is from red to blue. The  $\Delta E_{orb}$  energies are in kcal/mol. The eigenvalues  $v_i$  give the size of the charge migration.

| Complex  | $\Delta E_{orb(1)}$                                                                                                                                                                                           | $\Delta E_{orb(2)}$                                                                                                                                                                                            | $\Delta E_{orb(3)}$                                                                                                                                                                                             |
|----------|---------------------------------------------------------------------------------------------------------------------------------------------------------------------------------------------------------------|----------------------------------------------------------------------------------------------------------------------------------------------------------------------------------------------------------------|-----------------------------------------------------------------------------------------------------------------------------------------------------------------------------------------------------------------|
| $1_F$    | 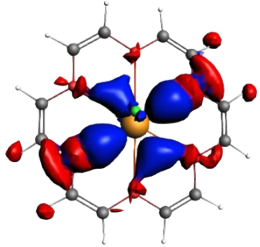 <p style="text-align: center;"><math>\Delta \rho_{(1)}</math><br/><math>\Delta E_{orb(1)} = -5.5;  v_1  = 0.12</math></p> |  <p style="text-align: center;"><math>\Delta \rho_{(2)}</math><br/><math>\Delta E_{orb(2)} = -5.2;  v_2  = 0.12</math></p> |  <p style="text-align: center;"><math>\Delta \rho_{(3)}</math><br/><math>\Delta E_{orb(3)} = -5.5;  v_2  = 0.11</math></p> |
| $1_{Cl}$ |  <p style="text-align: center;"><math>\Delta \rho_{(1)}</math><br/><math>\Delta E_{orb(1)} = -6.5;  v_1  = 0.14</math></p> |  <p style="text-align: center;"><math>\Delta \rho_{(2)}</math><br/><math>\Delta E_{orb(2)} = -6.6;  v_1  = 0.14</math></p> |  <p style="text-align: center;"><math>\Delta \rho_{(3)}</math><br/><math>\Delta E_{orb(3)} = -6.1;  v_1  = 0.13</math></p> |

# SUPPORTING INFORMATION

|                    |                                                                                                                                                                                                               |                                                                                                                                                                                                               |                                                                                                                                                                                                                |
|--------------------|---------------------------------------------------------------------------------------------------------------------------------------------------------------------------------------------------------------|---------------------------------------------------------------------------------------------------------------------------------------------------------------------------------------------------------------|----------------------------------------------------------------------------------------------------------------------------------------------------------------------------------------------------------------|
| $1_{Br}$           | 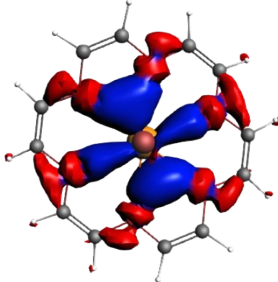 <p style="text-align: center;"><math>\Delta\rho_{(1)}</math><br/><math>\Delta E_{orb(1)} = -6.5;  v_1  = 0.15</math></p>    |  <p style="text-align: center;"><math>\Delta\rho_{(2)}</math><br/><math>\Delta E_{orb(2)} = -6.6;  v_1  = 0.14</math></p>   |  <p style="text-align: center;"><math>\Delta\rho_{(3)}</math><br/><math>\Delta E_{orb(3)} = -6.2;  v_1  = 0.13</math></p>   |
| $1_I$              |  <p style="text-align: center;"><math>\Delta\rho_{(1)}</math><br/><math>\Delta E_{orb(1)} = -6.4;  v_1  = 0.14</math></p>    |  <p style="text-align: center;"><math>\Delta\rho_{(2)}</math><br/><math>\Delta E_{orb(2)} = -6.0;  v_1  = 0.14</math></p>   |  <p style="text-align: center;"><math>\Delta\rho_{(3)}</math><br/><math>\Delta E_{orb(3)} = -5.8;  v_1  = 0.14</math></p>   |
| <b>Interaction</b> | $[\sigma e^- \text{ donation } 2p\{1\} \rightarrow 5d \text{ of Dy } \{\text{DyF}_2\}]$                                                                                                                       | $[\sigma e^- \text{ donation } 2p\{1\} \rightarrow 5d \text{ of Dy } \{\text{DyX}_2\}]$                                                                                                                       | $[\sigma e^- \text{ donation } 2p\{1\} \rightarrow 6s \text{ of Dy } \{\text{DyX}_2\}]$                                                                                                                        |
| $2_F$              |  <p style="text-align: center;"><math>\Delta\rho_{(1)}</math><br/><math>\Delta E_{orb(1)} = -9.9;  v_1  = 0.19</math></p>   |  <p style="text-align: center;"><math>\Delta\rho_{(2)}</math><br/><math>\Delta E_{orb(2)} = -7.7;  v_1  = 0.17</math></p>  |  <p style="text-align: center;"><math>\Delta\rho_{(3)}</math><br/><math>\Delta E_{orb(3)} = -7.3;  v_1  = 0.17</math></p>  |
| $2_{Cl}$           |  <p style="text-align: center;"><math>\Delta\rho_{(1)}</math><br/><math>\Delta E_{orb(1)} = -11.4;  v_1  = 0.20</math></p> |  <p style="text-align: center;"><math>\Delta\rho_{(2)}</math><br/><math>\Delta E_{orb(2)} = -9.8;  v_1  = 0.20</math></p> |  <p style="text-align: center;"><math>\Delta\rho_{(3)}</math><br/><math>\Delta E_{orb(3)} = -9.9;  v_1  = 0.20</math></p> |
| $2_{Br}$           |  <p style="text-align: center;"><math>\Delta\rho_{(1)}</math><br/><math>\Delta E_{orb(1)} = -11.3;  v_1  = 0.21</math></p> |  <p style="text-align: center;"><math>\Delta\rho_{(2)}</math><br/><math>\Delta E_{orb(2)} = -9.8;  v_1  = 0.20</math></p> |  <p style="text-align: center;"><math>\Delta\rho_{(3)}</math><br/><math>\Delta E_{orb(3)} = -9.9;  v_1  = 0.20</math></p> |



## SUPPORTING INFORMATION

|                    |                                                                                               |                                                                                               |                                                                                               |
|--------------------|-----------------------------------------------------------------------------------------------|-----------------------------------------------------------------------------------------------|-----------------------------------------------------------------------------------------------|
| $2_I$              | 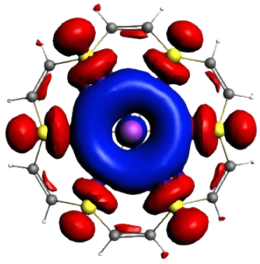             |             |            |
|                    | $\Delta\rho_{(1)}$<br>$\Delta E_{orb(1)} = -11.6;  v_1  = 0.21$                               | $\Delta\rho_{(2)}$<br>$\Delta E_{orb(2)} = -10.1;  v_1  = 0.21$                               | $\Delta\rho_{(3)}$<br>$\Delta E_{orb(3)} = -9.9;  v_1  = 0.21$                                |
| <b>Interaction</b> | $[\sigma \text{ e}^- \text{ donation } 3p\{2\} \rightarrow 6s \text{ of Dy}\{\text{DyX}_2\}]$ | $[\sigma \text{ e}^- \text{ donation } 3p\{2\} \rightarrow 5d \text{ of Dy}\{\text{DyX}_2\}]$ | $[\sigma \text{ e}^- \text{ donation } 3p\{2\} \rightarrow 5d \text{ of Dy}\{\text{DyX}_2\}]$ |

Table S6 shows the shape ETS-NOCV computed for the first three highest electron deformation densities,  $\Delta E_{orb(1)-(3)}$ . In each figure, orbital interaction ( $\Delta E_{orb}$ ) strength and eigenvalue  $v_i$  are given, giving quantitative information of the amount of displaced charge. The direction of the charge flow of the deformation densities is from red to blue, representing the ring's 2p/3p orbital of O/S of the donor, while the 5d/6s orbital of Dy {DyX<sub>2</sub>} fragment is the acceptor. The contours of electron deformation densities confirm the presence of  $\sigma$ -interaction between the p-orbital of the rings and 5d/6s orbitals of the Dy. In the **1<sub>X</sub>** series, we observe that the  $\Delta E_{orb(1)}$  and the  $\Delta E_{orb(2)}$  arise due to the donation of the electron from the 2p orbital of the O atom to 5d of Dy, whereas  $\Delta E_{orb(3)}$  emerges from the 2p orbital of the O atom to 6s-orbital of Dy. In the **2<sub>X</sub>** family of complexes, we observed that the most substantial interaction ( $\Delta E_{orb(1)}$ ) arises from the 3p orbital of the S to 6s-orbital of Dy, suggesting stronger 3p-6s overlap than the 3p-5d overlap. Moreover, the computed  $\Delta E_{orb(1)}$  magnitude in the **2<sub>X</sub>** family of complexes is nearly two times higher than what we observed in **1<sub>X</sub>** complexes, suggesting enhanced overlap due to the 3p orbital of the S atom. In addition, we observe that the magnitude of the  $v_i$  increases marginally from -F to -I analogue in both the series, which indicates that the amount of electron density flow from ring to Dy increases as we move lighter halides to heavier halides.

## SUPPORTING INFORMATION

**Table S8:** NBO computed Natural Population Analysis and the NPA Charges of the Dy and O/S centres of complexes **1<sub>X</sub>-2<sub>X</sub>**.

|                       | Dy                                |            | O/S                      |                  |
|-----------------------|-----------------------------------|------------|--------------------------|------------------|
|                       | NPA                               | NPA Charge | NPA                      | Avg. NPA Charges |
| <b>1<sub>F</sub></b>  | [core]6s( 0.05)4f( 2.05)5d( 0.30) | 2.121      | [core]2s( 0.98)2p( 2.88) | -0.751           |
| <b>1<sub>Cl</sub></b> | [core]6s( 0.09)4f( 2.03)5d( 0.43) | 1.833      | [core]3s( 0.96)3p( 2.84) | -0.722           |
| <b>1<sub>Br</sub></b> | [core]6s( 0.10)4f( 2.03)5d( 0.46) | 1.825      | [core]4s( 0.96)4p( 2.81) | -0.750           |
| <b>1<sub>I</sub></b>  | [core]6s( 0.13)4f( 2.04)5d( 0.52) | 1.287      | [core]5s( 0.95)5p( 2.77) | -0.510           |
| <b>2<sub>F</sub></b>  | [core]6s( 0.11)4f( 2.07)5d( 0.37) | 1.846      | [core]3s( 0.80)3p( 2.04) | 0.211            |
| <b>2<sub>Cl</sub></b> | [core]6s( 0.16)4f( 2.03)5d( 0.57) | 1.378      | [core]3s( 0.96)3p( 2.84) | 0.232            |
| <b>2<sub>Br</sub></b> | [core]6s( 0.18)4f( 2.02)5d( 0.62) | 1.293      | [core]3s( 0.80)3p( 2.02) | 0.236            |
| <b>2<sub>I</sub></b>  | [core]6s( 0.21)4f( 2.02)5d( 0.72) | 0.569      | [core]3s( 0.79)3p( 2.03) | 0.249            |

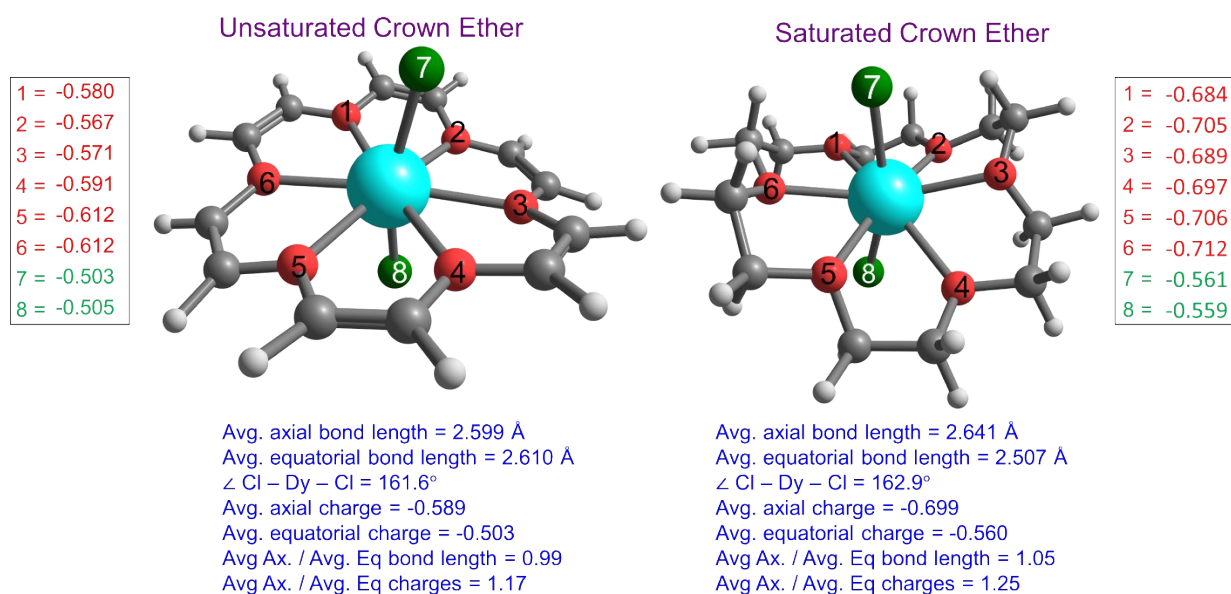

**Figure S3:** Selected bond parameters and CASSCF computed Mulliken Charges (inset) on the first coordination sphere atoms for  $[\text{Dy}(\text{U}18\text{C}6)\text{Cl}_2]^+$  (left) and  $[\text{Dy}(18\text{C}6)\text{Cl}_2]^+$  (right) along with select bond parameters. Color code Cyan (Dy), Red (O), Dark green (Cl), Grey (C), White (H).



# SUPPORTING INFORMATION

34915.0

35439.6

|                           |                  | Saturated $2_{C1}$            |          |          |          | $2_{C1}$         |                               |          |          |          |
|---------------------------|------------------|-------------------------------|----------|----------|----------|------------------|-------------------------------|----------|----------|----------|
|                           | Spin-free states | SOC states ( ${}^6H_{15/2}$ ) | g-values |          |          | Spin-free states | SOC states ( ${}^6H_{15/2}$ ) | g-values |          |          |
|                           |                  |                               | $g_{xx}$ | $g_{yy}$ | $g_{zz}$ |                  |                               | $g_{xx}$ | $g_{yy}$ | $g_{zz}$ |
| <b><math>{}^6H</math></b> | 0.0              | 0.0                           |          |          |          | 0.0              |                               |          |          |          |
|                           | 1.8              | 669.9                         |          |          |          | 0.3              |                               |          |          |          |
|                           | 283.4            | 1270.1                        | 0.0066   | 0.0085   | 19.8726  | 660.5            | 0.0                           | 0.0000   | 0.0000   | 19.9887  |
|                           | 299.7            | 1725.2                        | 0.2849   | 0.3482   | 16.9097  | 669.5            | 381.3                         | 0.0363   | 0.0363   | 17.0730  |
|                           | 429.7            | 1972.2                        | 0.9498   | 1.9048   | 12.7672  | 1002.7           | 704.2                         | 0.0000   | 0.0109   | 14.2109  |
|                           | 447.1            | 2031.0                        | 2.4262   | 5.8277   | 12.5307  | 1093.4           | 929.6                         | 0.0415   | 0.0462   | 10.9288  |
|                           | 473.1            | 2062.8                        | 0.8166   | 3.2658   | 12.5678  | 1134.8           | 1036.3                        | 8.9575   | 8.9042   | 4.6530   |
|                           | 593.3            | 2094.7                        | 0.7999   | 4.0404   | 12.9150  | 1141.5           | 1097.5                        | 11.4708  | 9.7305   | 1.2547   |
|                           | 627.9            |                               | 3.2864   | 4.3477   | 8.7708   | 1196.1           | 1112.7                        | 0.2804   | 1.4529   | 3.2461   |
|                           | 706.7            |                               | 0.9945   | 3.1542   | 16.1956  | 1216.5           | 1132.5                        | 9.4810   | 8.3278   | 2.1069   |
|                           | 714.4            |                               |          |          |          | 1233.6           |                               |          |          |          |
| <b><math>{}^6F</math></b> | 7620.9           |                               |          |          |          | 7967.3           |                               |          |          |          |
|                           | 7629.1           |                               |          |          |          | 8100.2           |                               |          |          |          |
|                           | 7640.3           |                               |          |          |          | 8113.9           |                               |          |          |          |
|                           | 7704.2           |                               |          |          |          | 8244.7           |                               |          |          |          |
|                           | 7783.1           |                               |          |          |          | 8330.8           |                               |          |          |          |
|                           | 7804.1           |                               |          |          |          | 8332.5           |                               |          |          |          |
|                           | 7840.9           |                               |          |          |          | 8349.3           |                               |          |          |          |
| <b><math>{}^6P</math></b> | 34007.5          |                               |          |          |          | 34130.2          |                               |          |          |          |
|                           | 34590.4          |                               |          |          |          | 35421.5          |                               |          |          |          |
|                           | 34715.1          |                               |          |          |          | 35439.6          |                               |          |          |          |

## SUPPORTING INFORMATION

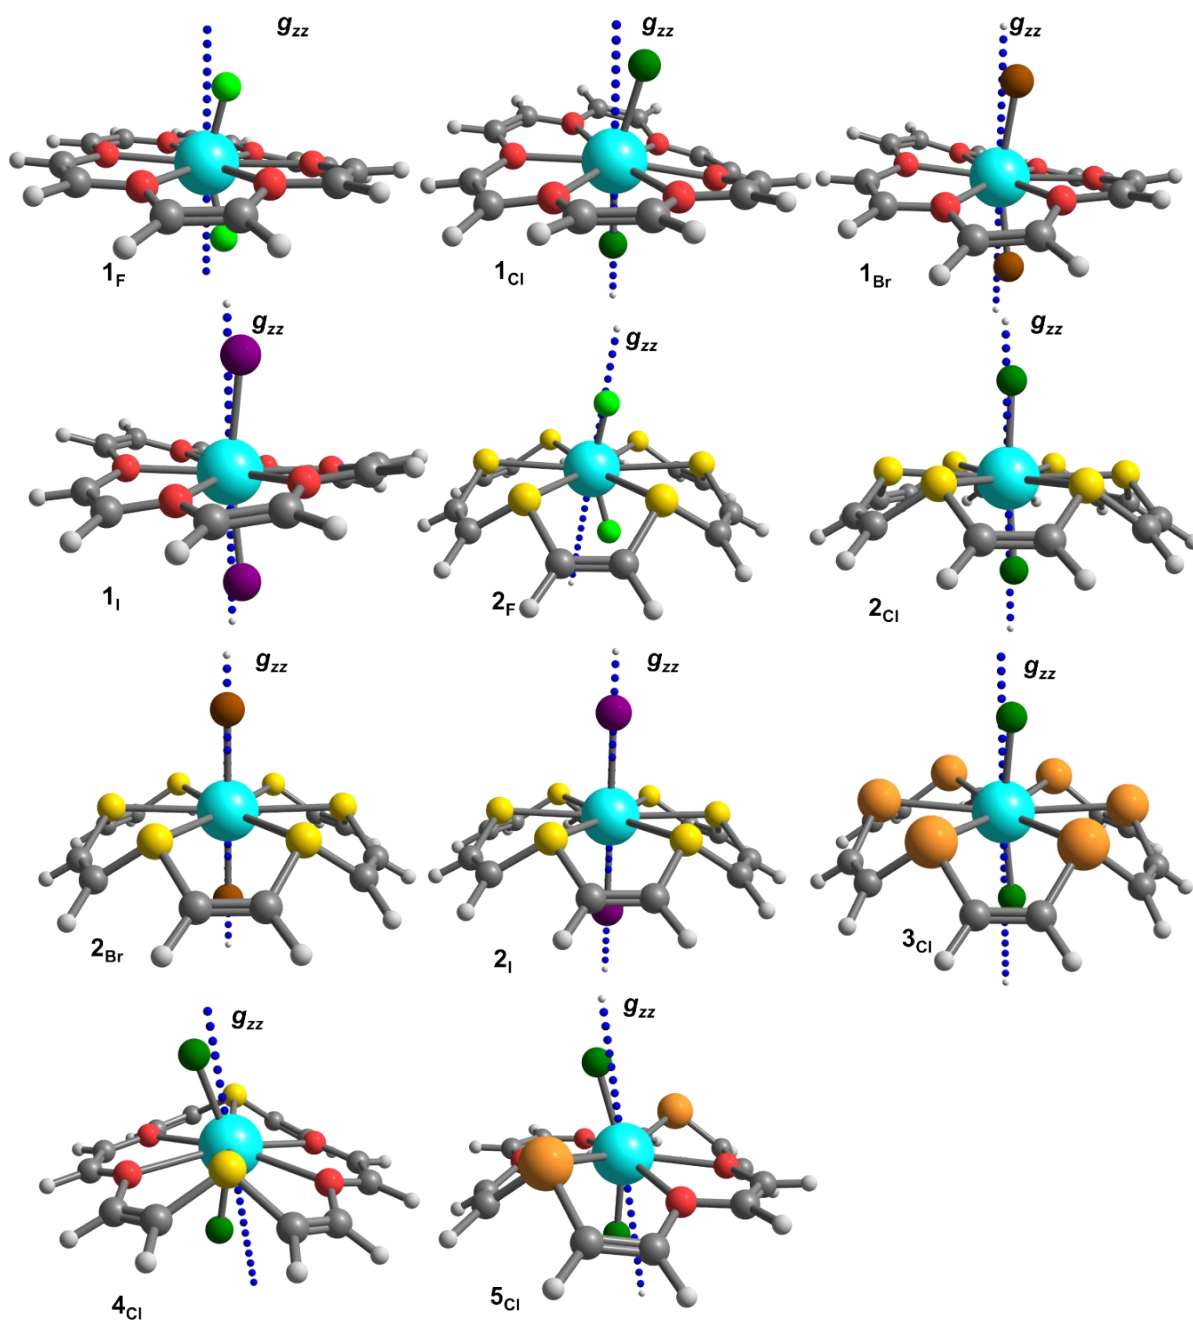

**Figure S5:** CASSCF computed main magnetic axis ( $g_{zz}$ ) in complexes  $1_X$ - $5_X$ . The dotted blue lines denotes orientation of the main magnetic anisotropy axis ( $g_{zz}$ ). Color code Cyan (Dy), Red (O), Yellow (S), Orange (Se), Light Green (F), Dark green (Cl), Brown (Br), Violet(I), Grey (C), White (H).

# SUPPORTING INFORMATION

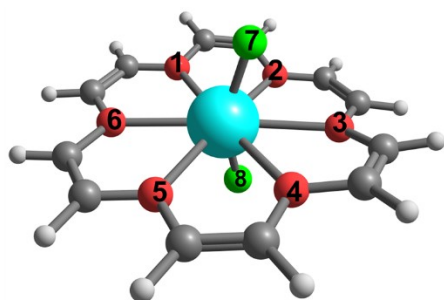

1 = -0.625  
 2 = -0.595  
 3 = -0.598  
 4 = -0.632  
 5 = -0.643  
 6 = -0.643  
 7 = -0.691  
 8 = -0.693

1<sub>F</sub>

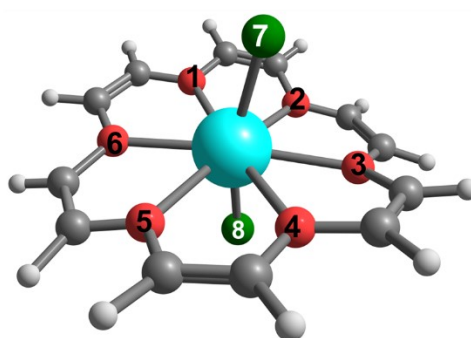

1 = -0.580  
 2 = -0.567  
 3 = -0.571  
 4 = -0.591  
 5 = -0.612  
 6 = -0.612  
 7 = -0.503  
 8 = -0.505

1<sub>Cl</sub>

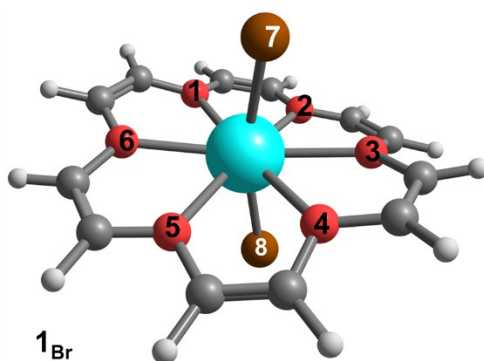

1 = -0.579  
 2 = -0.566  
 3 = -0.571  
 4 = -0.590  
 5 = -0.610  
 6 = -0.609  
 7 = -0.515  
 8 = -0.514

1<sub>Br</sub>

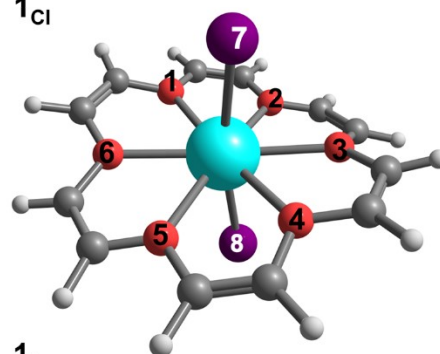

1 = -0.591  
 2 = -0.582  
 3 = -0.580  
 4 = -0.588  
 5 = -0.607  
 6 = -0.613  
 7 = -0.473  
 8 = -0.470

1<sub>I</sub>

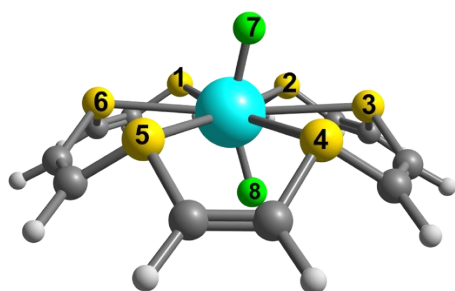

1 = -0.182  
 2 = -0.180  
 3 = -0.175  
 4 = -0.180  
 5 = -0.176  
 6 = -0.179  
 7 = -0.674  
 8 = -0.689

2<sub>F</sub>

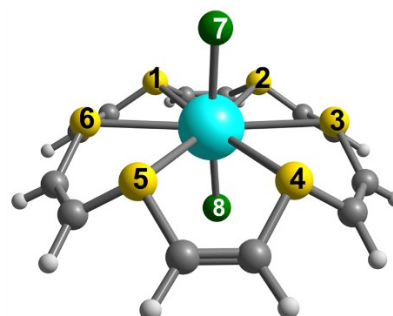

1 = -0.176  
 2 = -0.175  
 3 = -0.173  
 4 = -0.171  
 5 = -0.174  
 6 = -0.172  
 7 = -0.479  
 8 = -0.513

2<sub>Cl</sub>

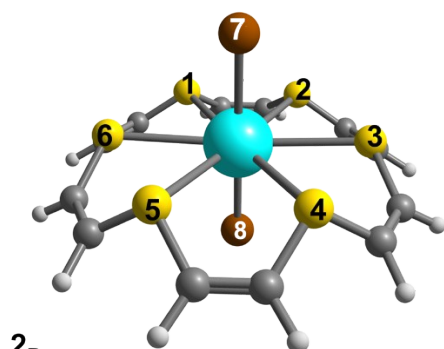

1 = -0.170  
 2 = -0.169  
 3 = -0.170  
 4 = -0.170  
 5 = -0.169  
 6 = -0.169  
 7 = -0.484  
 8 = -0.522

2<sub>Br</sub>

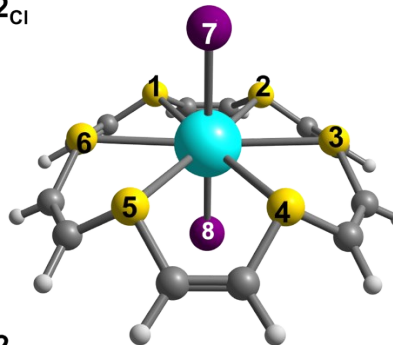

1 = -0.169  
 2 = -0.166  
 3 = -0.167  
 4 = -0.168  
 5 = -0.169  
 6 = -0.167  
 7 = -0.412  
 8 = -0.453

2<sub>I</sub>

## SUPPORTING INFORMATION

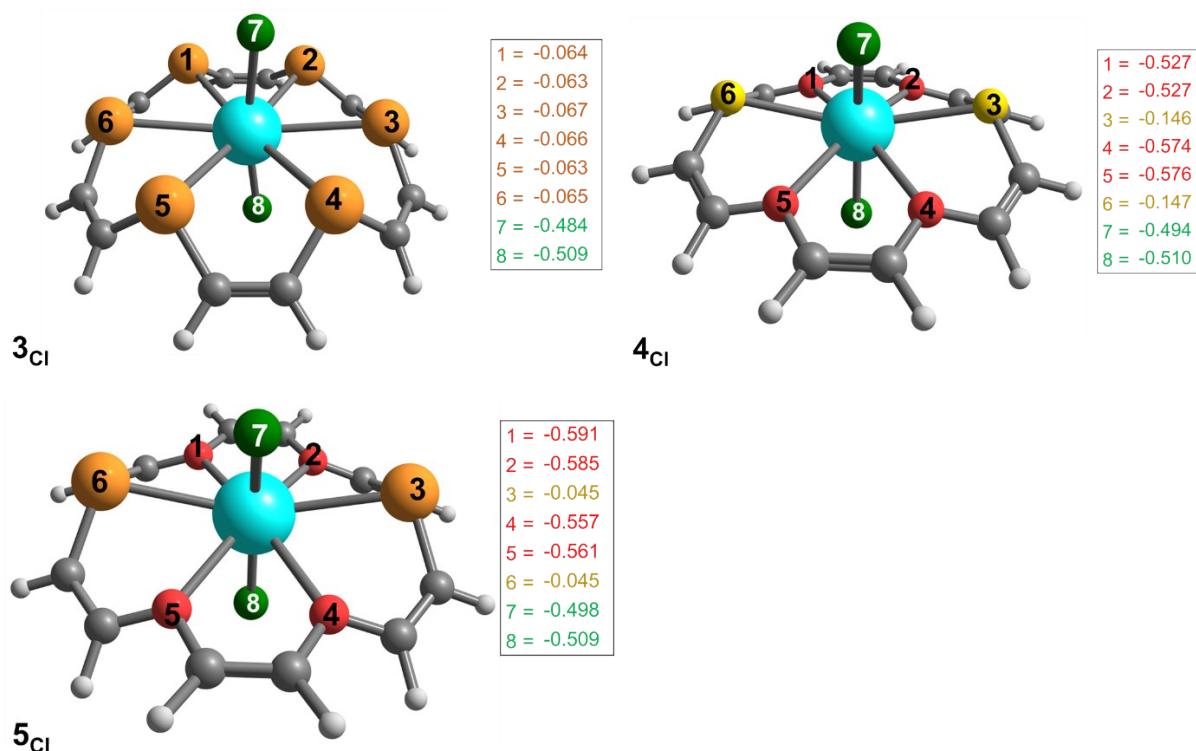

**Figure S6:** CASSCF computed Mulliken Charges for the atoms in the first coordination sphere for complexes  $1_X-5_X$ . Color code Cyan (Dy), Red (O), Yellow (S), Orange (Se), Light Green (F), Dark green (Cl), Brown (Br), Violet(I), Grey (C), White (H).

### Ab initio ligand field theory (AILFT) analysis

To investigate the bonding and covalent characteristics within these complexes, we have analysed the interelectronic repulsion parameters ( $E^1$ ,  $E^2$ , and  $E^3$ ) and the SOC ( $\zeta$ ) parameters for both the free ions and  $1_X-5_X$  complexes using AILFT. The calculated interelectronic repulsion values and their corresponding Racah parameters can be found in Tables S10 to S11. In CASSCF calculations, the computed  $E^1$ ,  $E^2$ , and  $E^3$  parameters for free Dy(III) ions are as follows: 7682.6, 42.6, and 817.2  $\text{cm}^{-1}$ . The computed  $E^1$ ,  $E^2$ , and  $E^3$  parameters for the complexes are observed to be lower than those of the free ions. This phenomenon reflects the nephelauxetic effect, resulting from a combination of covalent effects and the dispersion of the metal charge by the ligands. Owing to the inherently confined spatial distribution of the  $4f$ -orbital radial wavefunctions, the participation of the  $4f$ -electrons in bonding is notably restricted compared to the availability of vacant  $5d$ ,  $6s$ , and  $6p$  orbitals. Across all the examined complexes, a consistent reduction of approximately 0.5% to 0.7% has been observed in the  $E^1$ ,  $E^2$ , and  $E^3$  parameters. Additionally, we have noted a reduction in the  $\zeta$  parameter of the

## SUPPORTING INFORMATION

complex relative to the free ion, indicating a decrease in the angular momentum of the  $4f$  orbital due to complexation. The decrease in the  $\zeta$  parameter, known as the relativistic nephelauxetic effect, is linked to the orbital dilution effect, which indicates covalent interactions within the system. The computed trend in the reduction of  $F^2$ ,  $F^4$ , and  $F^6$  and  $\zeta$  parameters for all the studied complexes is provided in Fig. S5. Moreover, the Mulliken charges calculated using CASSCF consistently show a greater charge transfer from ligands to the Dy(III)  $5d$  orbitals compared to the  $4f$  orbitals, primarily attributed to the more diffuse characteristics of the  $5d$  orbitals. An examination of Mulliken charge transfer analysis consistently reveals a population of  $4f$  orbitals in the studied complexes, ranging from 0.14 to 0.30 electrons, underscoring the evident presence of small  $4f$  covalency within these investigated complexes (refer to Fig S9 for details).

To investigate differences in bonding nature and covalency between  $[\text{Dy}(\text{U18C6})\text{Cl}_2]^+$  and  $[\text{Dy}(\text{18C6})\text{Cl}_2]^+$ , we have analyzed the splitting pattern of  $f$ -orbitals in both complexes. A notable splitting of  $\sim 1629 \text{ cm}^{-1}$  was observed for the former, whereas only  $\sim 1026 \text{ cm}^{-1}$  for the latter, which is only  $\sim 63\%$  of the value of  $[\text{Dy}(\text{U18C6})\text{Cl}_2]^+$ . In both the cases, we have observed a distinct orbital order, with the sequence of  $f_{z^3} > f_{yz^2} > f_{xz^2} > f_{z(x^2-y^2)}/f_{xyz} > f_{y(3x^2-y^2)} > f_{x(x^2-3y^2)}$ , which arises from the  $\sigma$ -type interactions between the  $3p_z$  ligand ( $\text{Cl}^-$ ) orbitals of the ring and the  $4f$  orbitals of Dy(III) ions. The modest  $f$ -orbital splitting observed in the  $[\text{Dy}(\text{18C6})\text{Cl}_2]^+$  complex indicates a comparatively weak interaction between the  $4f$  orbitals and the ligands than  $[\text{Dy}(\text{U18C6})\text{Cl}_2]^+$ . In the case of complexes **1<sub>X</sub>**–**2<sub>X</sub>**, a substantial splitting of  $f$ -orbitals has been observed, spanning a range from 1035 to 2906  $\text{cm}^{-1}$ , with the most pronounced splitting being observed in complex **2<sub>F</sub>**. The substantial bond distance between the halide anion ( $\text{I}^-$ ) reduces interaction between the  $5p_z$  orbital of the halide and the  $4f$  orbital of Dy(III), resulting in the weak splitting for iodide analogue. In summary, the ligand field parameters calculated using AILFT, including the percentage reduction in  $F^2$ ,  $F^4$ ,  $F^6$  and  $\zeta$  values, offer an accurate way to understand the characteristics and intensity of the ligand field within the investigated complexes.



## SUPPORTING INFORMATION

**Table S10:** AILFT computed the Slater Condon parameters  $F^2$ ,  $F^4$ , and  $F^6$ , the one-electron effective parameters for spin-orbit coupling ( $\zeta$ ) for complexes  $1_X-5_X$  along with their % reduction at the CASSCF level of theory. All the values provided here are in the  $\text{cm}^{-1}$ .

| Complexes               | $F^2$    | $F^4$   | $F^6$   | $\zeta$ | $F^2(\%)$ | $F^4(\%)$ | $F^6(\%)$ | $\zeta(\%)$ |
|-------------------------|----------|---------|---------|---------|-----------|-----------|-----------|-------------|
| <b>Dy(III) Free Ion</b> | 121962.8 | 76517.7 | 55041.9 | 1742.1  | -         | -         | -         | -           |
| <b>1<sub>F</sub></b>    | 121227.8 | 75931.2 | 54676.8 | 1736.1  | 0.6       | 0.8       | 0.7       | 0.3         |
| <b>1<sub>Cl</sub></b>   | 121245.5 | 75993.2 | 54680.2 | 1735.2  | 0.6       | 0.7       | 0.7       | 0.4         |
| <b>1<sub>Br</sub></b>   | 121271.0 | 76022.1 | 54695.6 | 1735.0  | 0.6       | 0.6       | 0.6       | 0.4         |
| <b>1<sub>I</sub></b>    | 121289.4 | 76047.2 | 54705.4 | 1734.6  | 0.6       | 0.6       | 0.6       | 0.4         |
| <b>2<sub>F</sub></b>    | 121167.0 | 75883.1 | 54645.3 | 1735.7  | 0.7       | 0.8       | 0.7       | 0.4         |
| <b>2<sub>Cl</sub></b>   | 121213.9 | 75965.0 | 54664.2 | 1735.0  | 0.6       | 0.7       | 0.7       | 0.4         |
| <b>2<sub>Br</sub></b>   | 121221.9 | 75983.9 | 54670.1 | 1734.6  | 0.6       | 0.7       | 0.7       | 0.4         |
| <b>2<sub>I</sub></b>    | 121224.0 | 75999.3 | 54673.5 | 1734.1  | 0.6       | 0.7       | 0.7       | 0.5         |
| <b>3<sub>Cl</sub></b>   | 121229.3 | 75974.5 | 54671.3 | 1735.1  | 0.6       | 0.7       | 0.7       | 0.4         |
| <b>4<sub>Cl</sub></b>   | 121238.4 | 75997.8 | 54681.3 | 1735.3  | 0.6       | 0.7       | 0.7       | 0.4         |
| <b>5<sub>Cl</sub></b>   | 121204.2 | 75965.0 | 54662.7 | 1735.0  | 0.6       | 0.7       | 0.7       | 0.4         |

Reduction (%) = [1- (complex/free-ion)] \* 100

**Table S11:** AILFT computed the Racah parameters  $E^1$ ,  $E^2$ , and  $E^3$  for complexes  $1_X-5_X$  along with their % reduction at the CASSCF level of theory. All the values provided here are in the  $\text{cm}^{-1}$ .

| Complexes               | $E^1$  | $E^2$ | $E^3$ | $E^1(\%)$ | $E^2(\%)$ | $E^3(\%)$ |
|-------------------------|--------|-------|-------|-----------|-----------|-----------|
| <b>Dy(III) Free Ion</b> | 7632.4 | 42.4  | 812.1 | -         | -         | -         |
| <b>1<sub>F</sub></b>    | 7634.5 | 42.4  | 812.4 | 0.7       | 0.5       | 0.6       |
| <b>1<sub>Cl</sub></b>   | 7636.6 | 42.4  | 812.6 | 0.6       | 0.5       | 0.6       |
| <b>1<sub>Br</sub></b>   | 7638.1 | 42.4  | 812.7 | 0.6       | 0.5       | 0.6       |
| <b>1<sub>I</sub></b>    | 7628.2 | 42.4  | 811.7 | 0.6       | 0.5       | 0.5       |
| <b>2<sub>F</sub></b>    | 7632.3 | 42.4  | 812.2 | 0.7       | 0.6       | 0.7       |
| <b>2<sub>Cl</sub></b>   | 7633.2 | 42.4  | 812.2 | 0.7       | 0.6       | 0.6       |
| <b>2<sub>Br</sub></b>   | 7633.7 | 42.4  | 812.3 | 0.6       | 0.6       | 0.6       |
| <b>2<sub>I</sub></b>    | 7633.3 | 42.4  | 812.3 | 0.6       | 0.6       | 0.6       |
| <b>3<sub>Cl</sub></b>   | 7634.4 | 42.4  | 812.3 | 0.6       | 0.6       | 0.6       |
| <b>4<sub>Cl</sub></b>   | 7631.9 | 42.4  | 812.1 | 0.6       | 0.6       | 0.6       |
| <b>5<sub>Cl</sub></b>   | 7682.6 | 42.6  | 817.2 | 0.7       | 0.6       | 0.6       |

Reduction (%) = [1- (complex/free-ion)] \* 100

The Racah parameters  $E^1$ ,  $E^2$  and  $E^3$  (for f-electrons), can be stated in terms of the Slater-Condon parameters  $F^2$ ,  $F^4$ , and  $F^6$ , using the following equation:

$$F_2 = \frac{F^2}{225} \dots\dots\dots(1)$$

$$F_4 = \frac{F^4}{1089} \dots\dots\dots (2)$$

$$F_6 = \frac{F^6}{7361.64} \dots\dots\dots (3)$$

$$E^1 = \frac{70F_2 + 231F_4 + 2002F_6}{9} \dots\dots\dots (4)$$

## SUPPORTING INFORMATION

$$E^2 = \frac{F_2 - 3F_4 + 7F_6}{9} \dots\dots\dots (5)$$

$$E^3 = \frac{5F_2 + 6F_4 + 91F_6}{3} \dots\dots\dots (6)$$

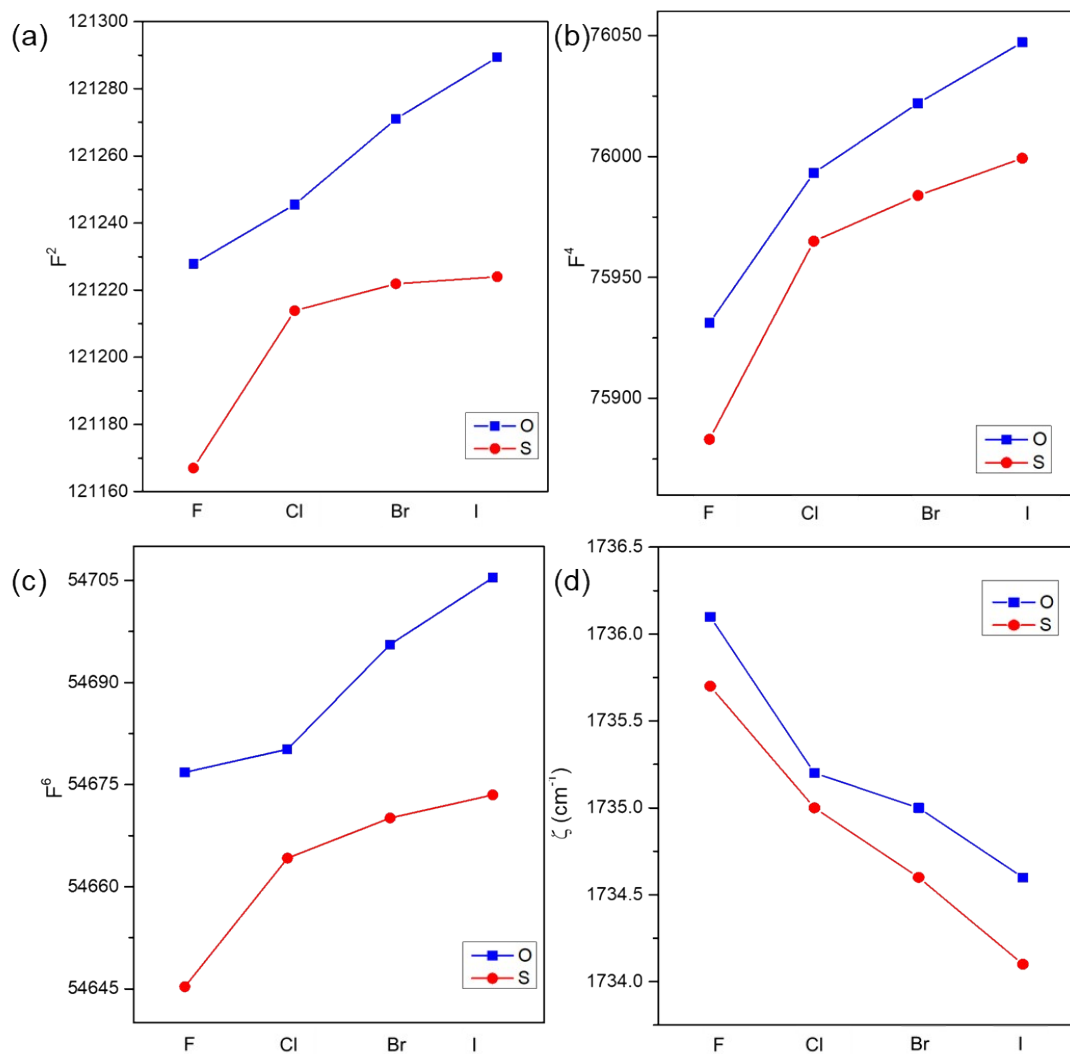

**Figure S7:** AILFT-CASSCF computed trends in in Slater Condon parameters (a)  $F^2$ , (b)  $F^4$  (c)  $F^6$  and (d)  $\zeta$  for complexes  $1X-2X$  series.

## SUPPORTING INFORMATION

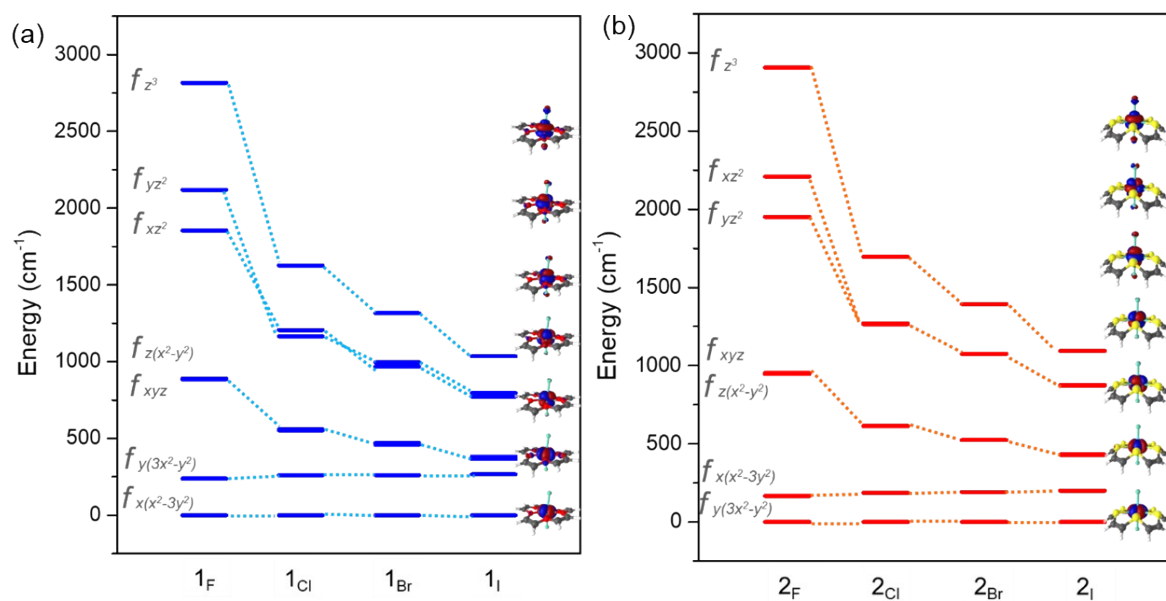

**Figure S8:** AILFT computed splitting pattern of 4f orbitals in the complex  $1_x$  and  $2_x$  series.

## SUPPORTING INFORMATION

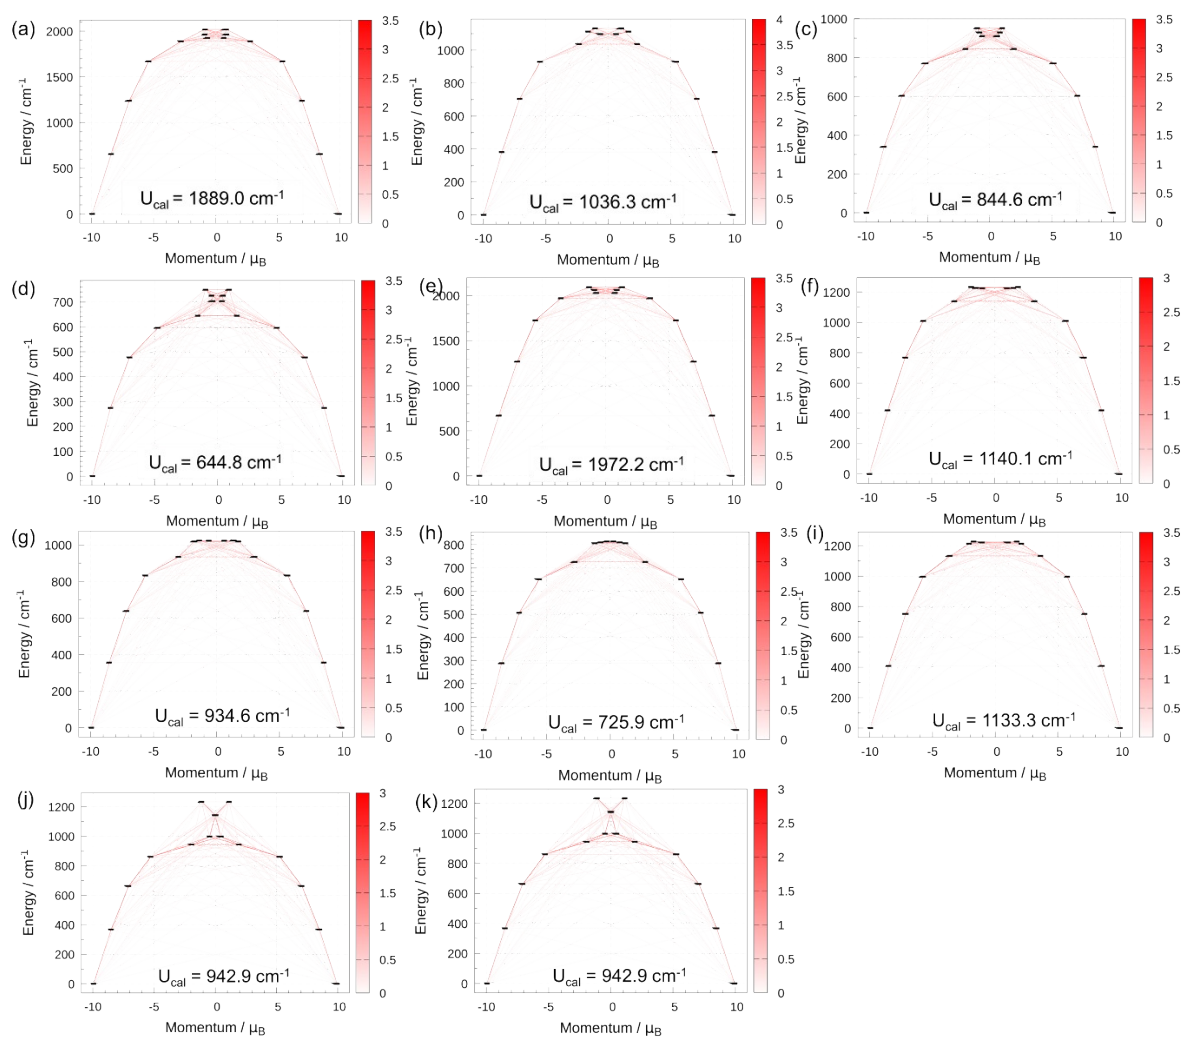

**Figure S9:** SINGLE\_ANISO computed blockade barrier for the complexes (a)  $1_F$  (b)  $1_{C1}$  (c)  $1_{Br}$  (d)  $1_I$  (e)  $2_F$  (f)  $2_{C1}$  (g)  $2_{Br}$  (h)  $2_I$  (i)  $3_{C1}$  (j)  $4_{C1}$  (k)  $5_{C1}$ . The bold black lines denote the states which are placed according to the values of their magnetic moments. The horizontal lines denote the tunnelling transitions within each doublet state, and the non-horizontal lines correspond to the spin-phonon transition paths.<sup>19</sup> The color intensity of the lines correlates to the amplitude of the averaged transition moments connecting the corresponding states.

## SUPPORTING INFORMATION

**Table S12.** Calculated  $U_{\text{eff}}$  (in  $\text{cm}^{-1}$ ) as well as the theoretically predicted three most important excited KDs

| Complexes             | $U_{\text{cal}}(\text{cm}^{-1})$ | $U_{\text{eff}}(\text{cm}^{-1})$ | % contribution from KDs     |
|-----------------------|----------------------------------|----------------------------------|-----------------------------|
| <b>1<sub>F</sub></b>  | 1889.0                           | 1710.0                           | KD1 23% + KD5 18% + KD2 14% |
| <b>1<sub>Cl</sub></b> | 1036.3                           | 1087.0                           | KD5 37% + KD6 33% + KD8 23% |
| <b>1<sub>Br</sub></b> | 844.6                            | 890.7                            | KD5 38% + KD6 26% + KD8 18% |
| <b>1<sub>I</sub></b>  | 644.8                            | 686.7                            | KD5 35% + KD6 27% + KD8 13% |
| <b>2<sub>F</sub></b>  | 1972.2                           | 1863.0                           | KD6 24% + KD5 18% + KD8 16% |
| <b>2<sub>Cl</sub></b> | 1140.1                           | 1196.0                           | KD5 42% + KD6 30% + KD7 14% |
| <b>2<sub>Br</sub></b> | 934.6                            | 1008.0                           | KD5 33% + KD7 27% + KD6 22% |
| <b>2<sub>I</sub></b>  | 725.9                            | 797.3                            | KD5 35% + KD7 26% + KD6 26% |
| <b>3<sub>Cl</sub></b> | 1133.3                           | 1201.0                           | KD5 42% + KD6 29% + KD7 22% |
| <b>4<sub>Cl</sub></b> | 942.9                            | 960.3                            | KD5 44% + KD4 18% + KD6 17% |
| <b>5<sub>Cl</sub></b> | 1043.0                           | 1039.0                           | KD5 36% + KD6 28% + KD4 22% |

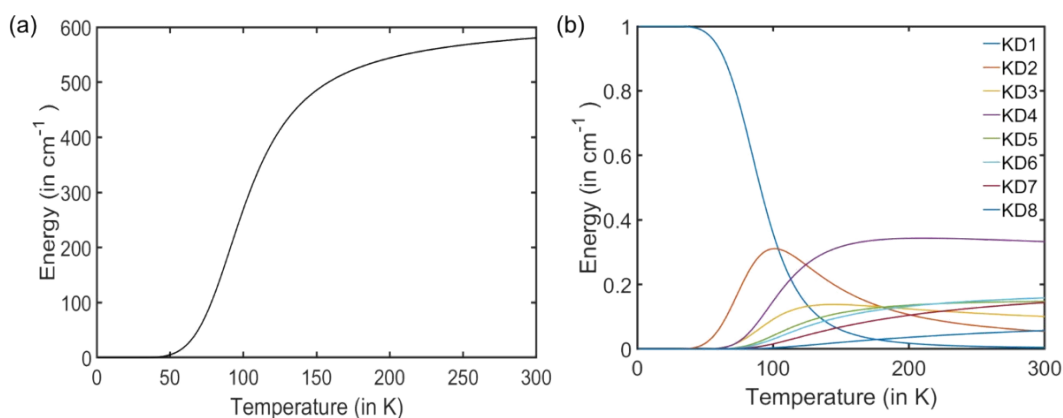

**Figure S10:** (a) Temperature dependence of calculated  $U_{\text{eff}}$  for  $[\text{Dy}(\text{18C6})\text{Cl}_2]^+$ , (b) relative contribution of each Kramer's doublet to the relaxation calculated as  $k_i(T)/N_k$ .

## SUPPORTING INFORMATION

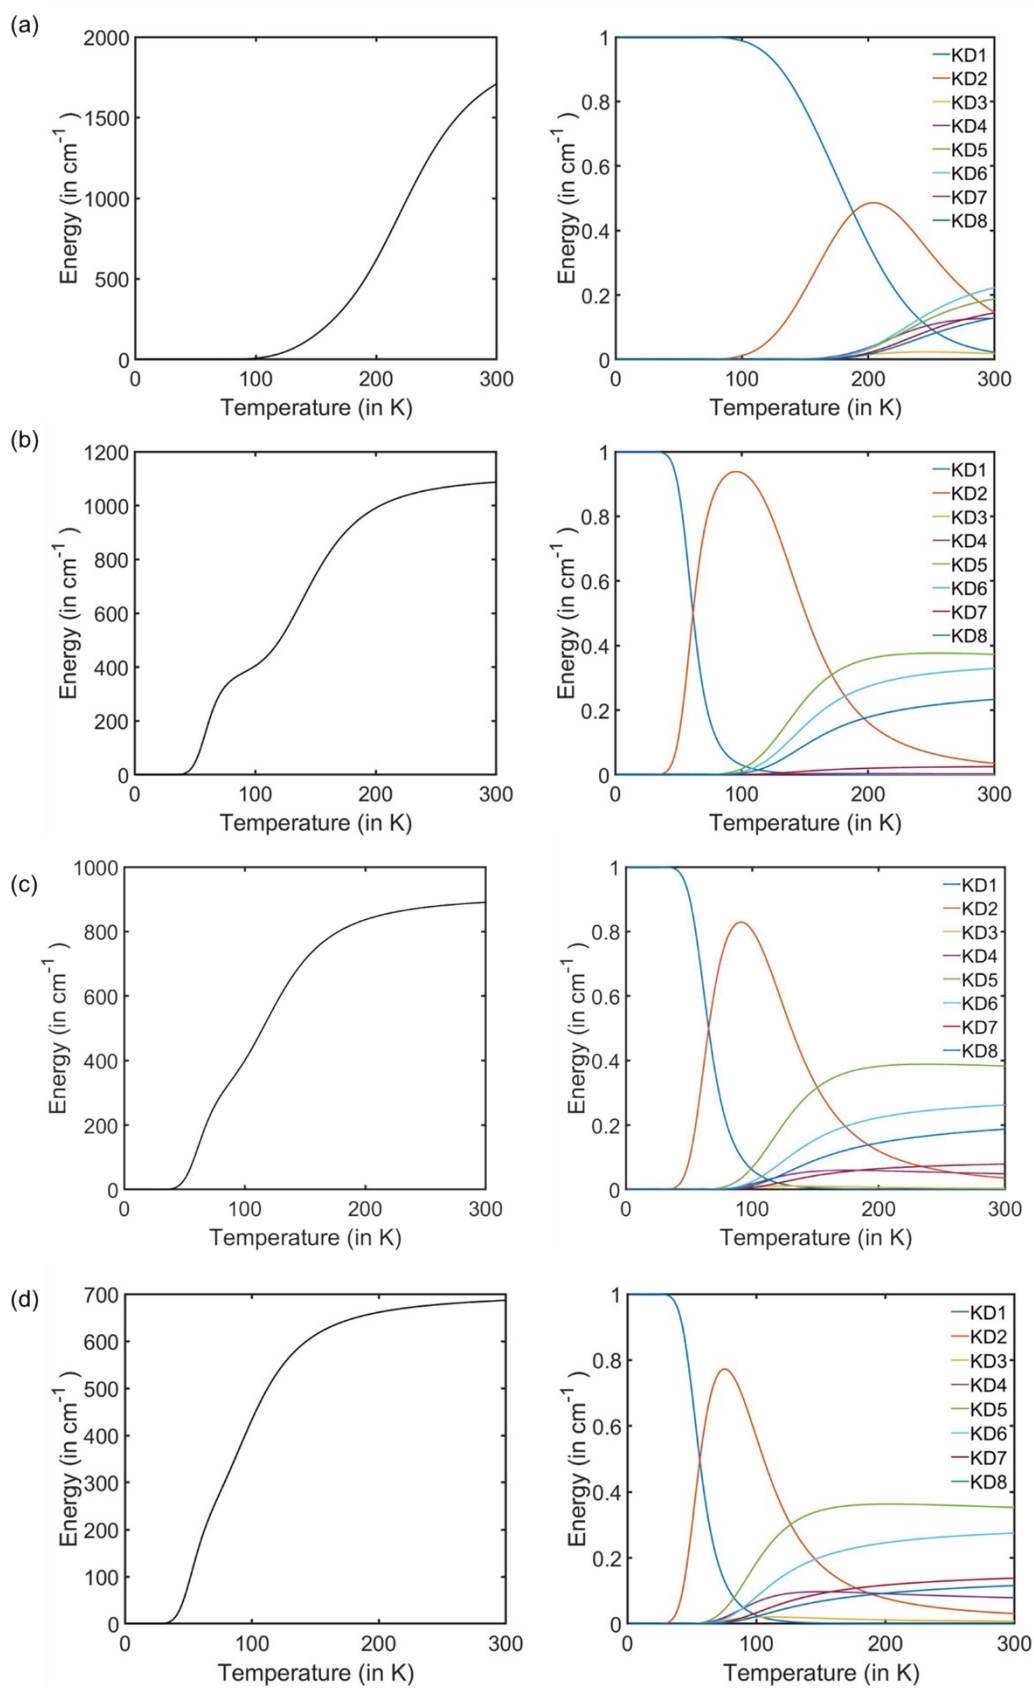

**Figure S11:** (a)-(d) Temperature dependence of calculated  $U_{eff}$  for  $\mathbf{1}_F$ ,  $\mathbf{1}_{Cl}$ ,  $\mathbf{1}_{Br}$  and  $\mathbf{1}_I$  (right) and relative contribution of each Kramer's doublet to the relaxation calculated as  $k_i(T)/N_k$  (left).

## SUPPORTING INFORMATION

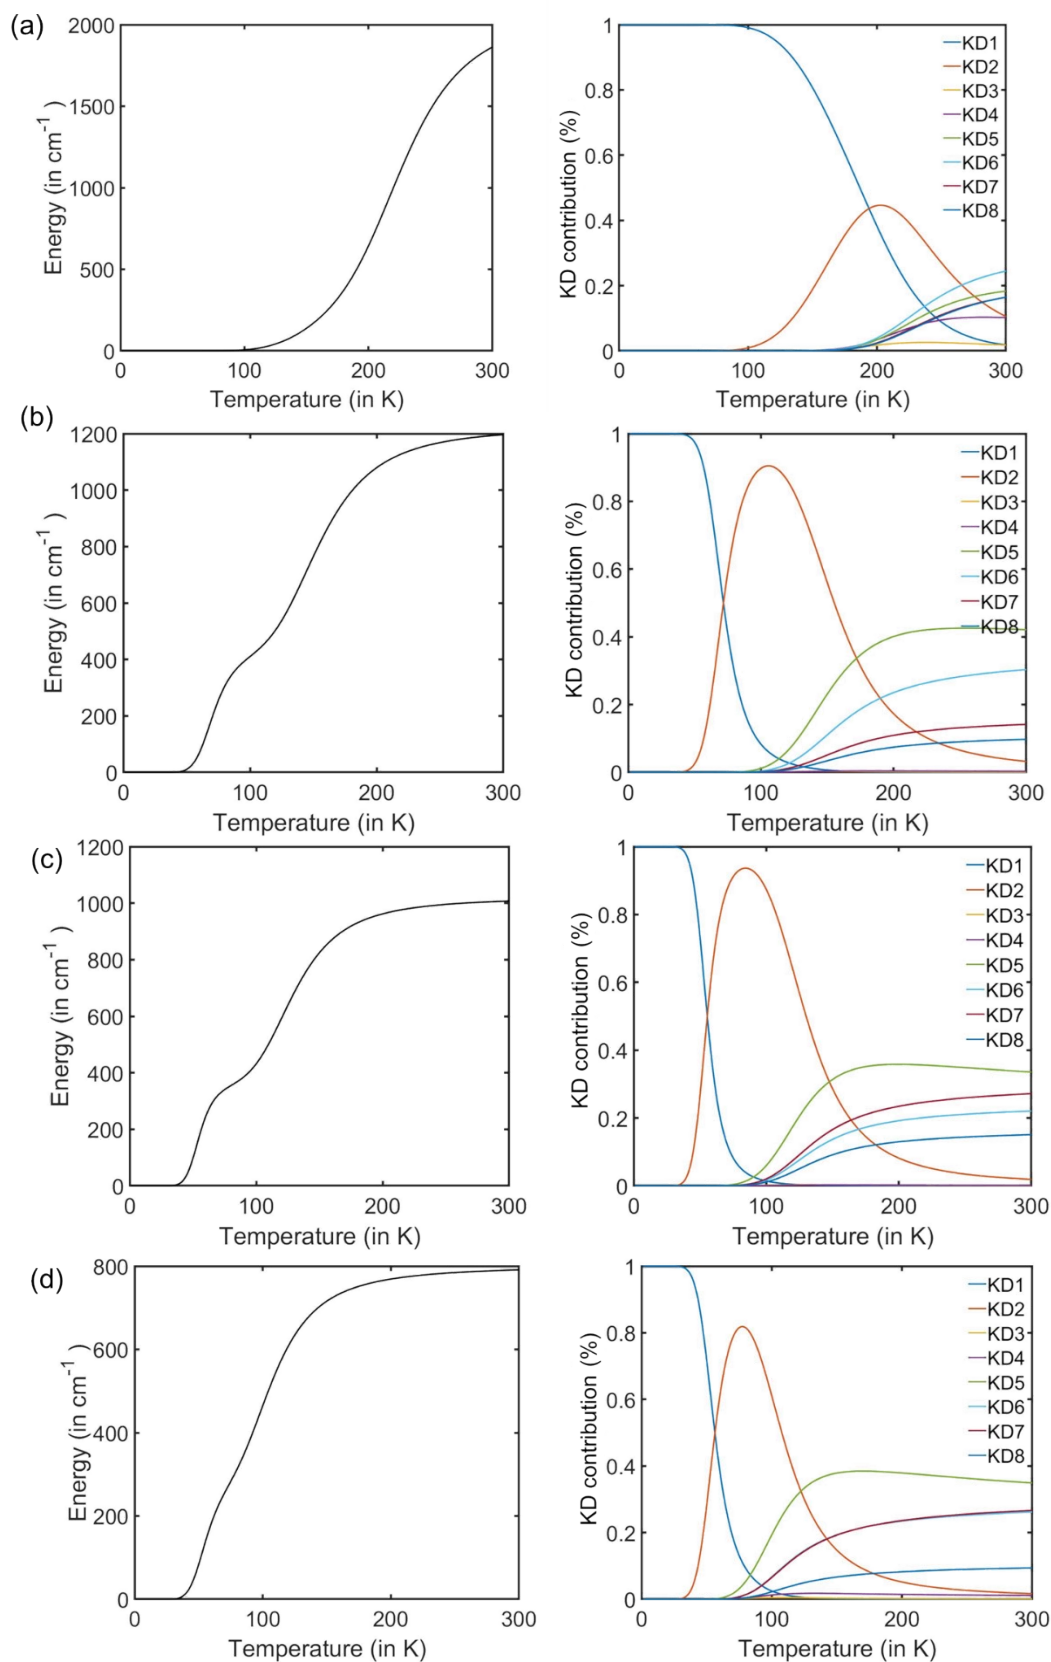

**Figure S12:** (a)-(d) Temperature dependence of calculated  $U_{\text{eff}}$  for  $2_F$ ,  $2_{Cl}$ ,  $2_{Br}$  and  $2_I$  (right) and relative contribution of each Kramer's doublet to the relaxation calculated as  $k_i(T)/N_k$  (left).

## SUPPORTING INFORMATION

### Magnetic anisotropy calculations in model complexes with bulky axial ligands

In order to synthesise and isolate these complexes, we often require a bulky group on the axial position to prevent multiple coordination and to maintain the axiality. In addition to our studied complexes **1<sub>X</sub>**-**5<sub>X</sub>**, we have prepared two model complexes where we chose the bulky ligands -OSiPh<sub>3</sub> and -O<sup>t</sup>Bu as the axial ligands. In literature the -OSiPh<sub>3</sub> ligand has been used as an axial ligand with Schiff-based ligands in [Dy(L<sub>1</sub><sup>N6</sup>)(Ph<sub>3</sub>SiO)<sub>2</sub>]<sup>+</sup> (with U<sub>eff</sub> = 1080K); <sup>20</sup> [Dy(L<sub>2</sub><sup>N6</sup><sub>R/S</sub>)(Ph<sub>3</sub>SiO)<sub>2</sub>]<sup>+</sup> (with U<sub>eff</sub> = 1833 K (R); U<sub>eff</sub> = 1819 K (S)); <sup>21</sup> [DyL<sub>3</sub><sup>N6</sup><sub>R/S</sub>(Ph<sub>3</sub>SiO)<sub>2</sub>]<sup>+</sup> (with U<sub>eff</sub> = 1454 K (R); U<sub>eff</sub> = 1457 K (S)); <sup>22</sup> [Dy(L<sub>4</sub><sup>N6</sup>)(Ph<sub>3</sub>SiO)<sub>2</sub>] (with U<sub>eff</sub> 1732 K) <sup>23</sup> to name a few. Similarly, the -O<sup>t</sup>Bu ligand has been used in [Dy(O<sup>t</sup>Bu)<sub>2</sub>(L<sub>5</sub>)<sub>4</sub>]<sup>+</sup> (U<sub>eff</sub> = 2075 K); <sup>24</sup> [Dy(O<sup>t</sup>Bu)<sub>2</sub>(py)<sub>5</sub>]<sup>+</sup> (U<sub>eff</sub> = 1815 K) <sup>25</sup>. Here, we have prepared model complexes of thia crowns, where these bulky ligands occupy the axial positions and complexes are named **2<sub>OSiPh3</sub>** and **2<sub>OtBu</sub>**.

(L<sub>1</sub> = Schiff-base ligand derived from 2,6- diacetylpyridine and ethylenediamine; L<sub>2</sub> = Schiff-base ligand derived from 2,6-pyridinedicarboxaldehyde and (1R/S, 2R/S)-1,2-bis(2,4,6-trifluorophenyl)-ethane-1,2-diamine; L<sub>4</sub> = 2,5,8- triaza-1 (8,2), 4, 7 (2,8)-triquinolona cyclononaphane -2,5,8-triene; L<sub>5</sub> = 4-phenylpyridine)

For ease of optimisations, we replaced the Dy(III) atom with Lu(III) and carried out optimisations in the same manner as mentioned in the Computational Details. DFT optimized structure shows HBPY-8 geometry (HBPY-8; CShM = 4.753 for **2<sub>OSiPh3</sub>** and 3.126 for **2<sub>OtBu</sub>**). For **2<sub>OSiPh3</sub>** and **2<sub>OtBu</sub>**, the ratio of the avg. axial to avg. equatorial bond distance is 0.636 and 0.656, showing that the Dy(III) ion stabilizes in the two complexes in an axial ligand field. On these optimized coordinates, we performed CASSCF calculations with an active space of 9 electrons in 7 orbitals i.e., CAS(9,7). The computed SH parameters, along with spin-free and spin-orbit states are provided in Table S19. Our calculations determine an Ising-type anisotropy in the ground state with the g-values  $g_{zz} \sim 19.9$  and  $g_{xx} \sim g_{yy} \sim 1 \times 10^{-3}$  for both the complexes and the  $g_{zz}$  axis for the ground state KD is oriented nearly along the O–Dy–O bond, which coincides with the highest order pseudo C<sub>6</sub> axis. The ground state wavefunction is determined to be  $m_J |\pm 15/2\rangle$ , further supporting the claim that the dominant axial ligand field is stabilised around the Dy(III) ion. The CASSCF computed barrier height for both these complexes are 1903.3 cm<sup>-1</sup> for **2<sub>OSiPh3</sub>** and 2397.2 cm<sup>-1</sup> for **2<sub>OtBu</sub>**, respectively. For both complexes, the orientation of the main magnetic axis ( $g_{zz}$ ) and the magnetic relaxation pathway is depicted in Figure S13. These findings reveal that the relaxation barrier achieved with bulky ligands is on par with the results obtained from our top-performing complexes, **1<sub>F</sub>** and **2<sub>F</sub>**.



## SUPPORTING INFORMATION

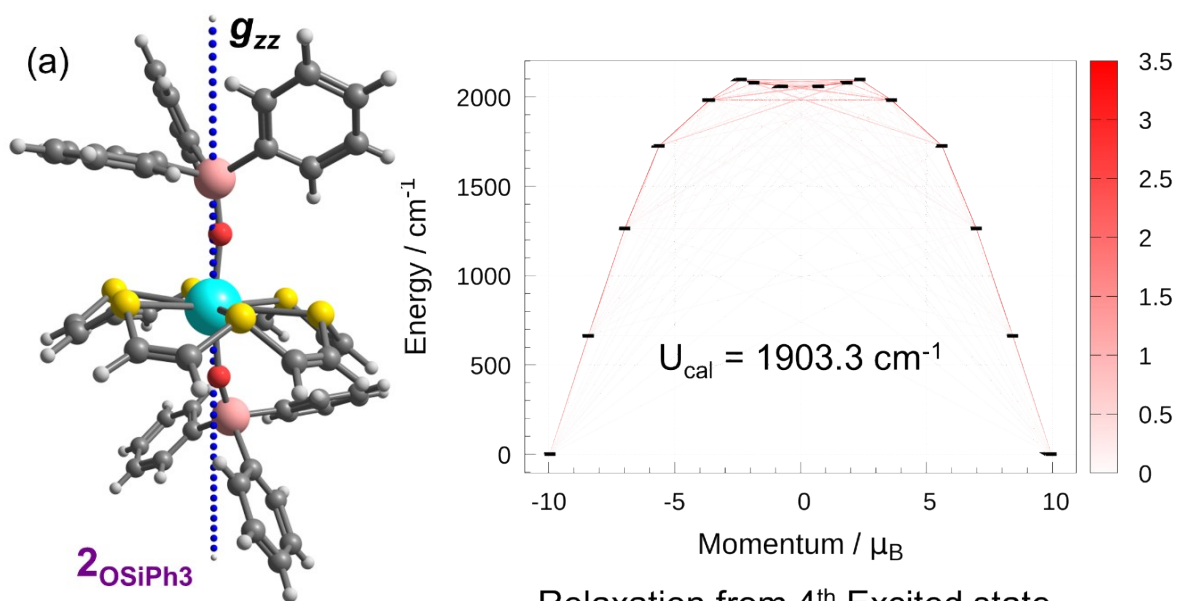

Relaxation from 4<sup>th</sup> Excited state

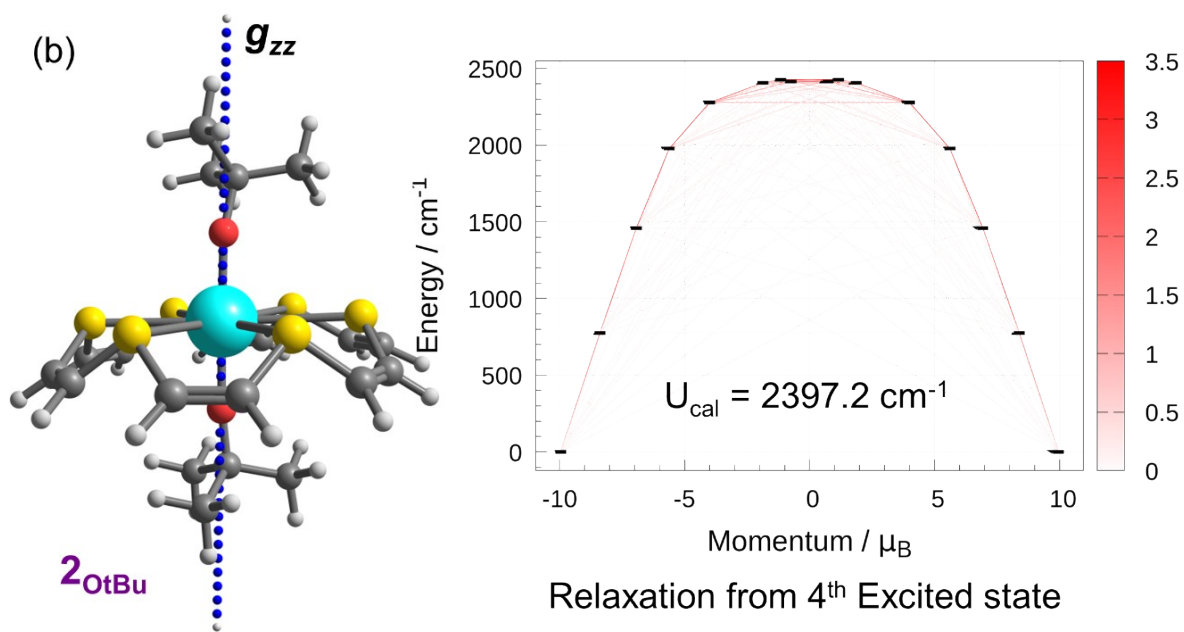

Relaxation from 4<sup>th</sup> Excited state

## SUPPORTING INFORMATION

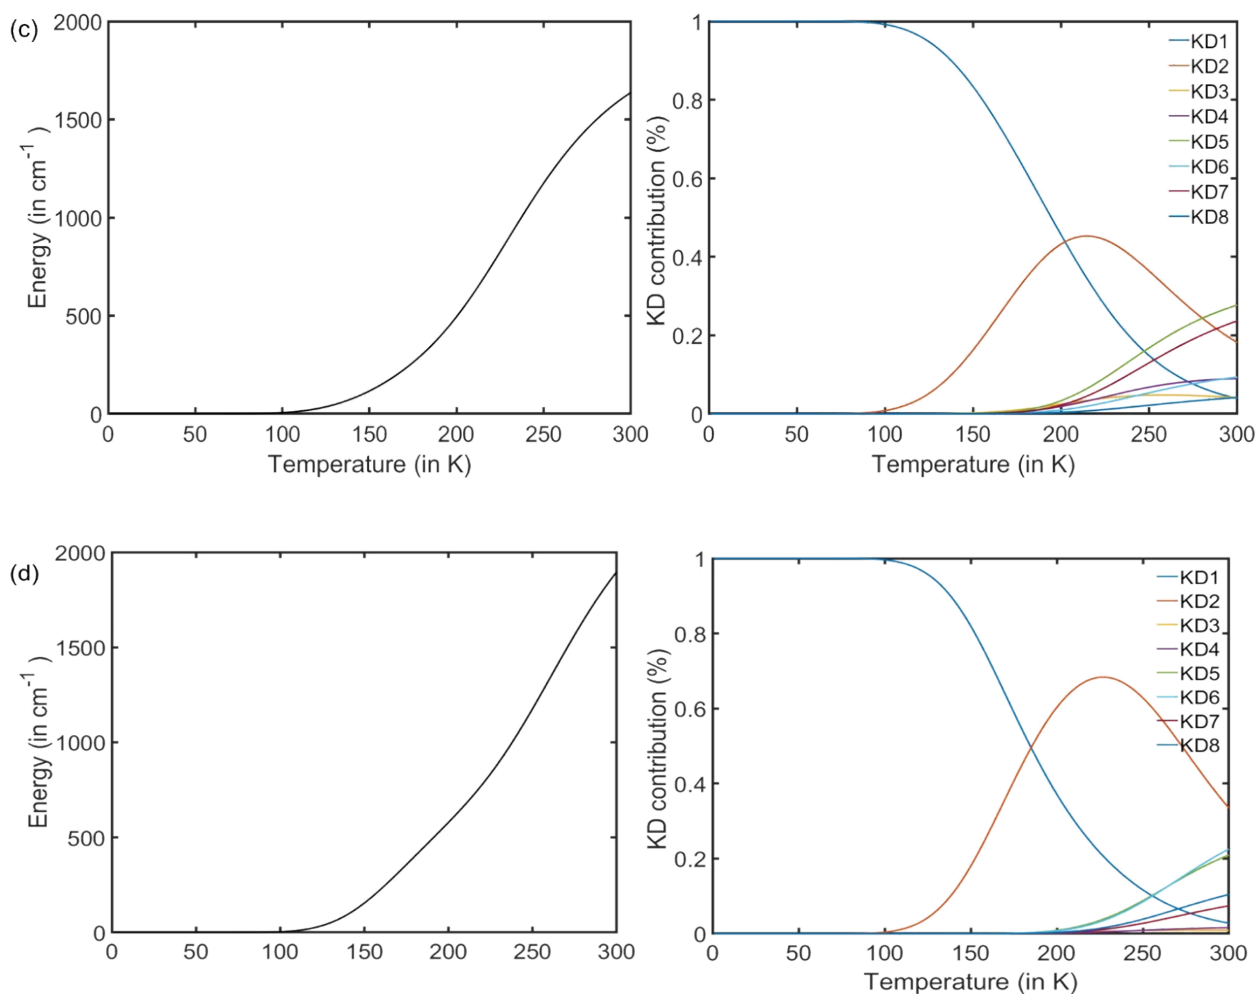

**Figure S13:** (a) Structure of model complex  $\mathbf{2}_{\text{OSiPh}_3}$  (right) and SINGLE\_ANISO computed blockade barrier (left), (b) Structure of model complex  $\mathbf{2}_{\text{OtBu}}$  (right) and SINGLE\_ANISO computed blockade barrier (left). (c) and (d) Temperature dependence of calculated  $U_{\text{eff}}$  for  $\mathbf{2}_{\text{OSiPh}_3}$ ,  $\mathbf{2}_{\text{OtBu}}$  (right) and relative contribution of each Kramer's doublet to the relaxation calculated as  $k_i(T)/N_k$  (left). Color code Cyan (Dy), Red (O), Yellow (S), Pink (Si), Grey (C), White (H).

## SUPPORTING INFORMATION

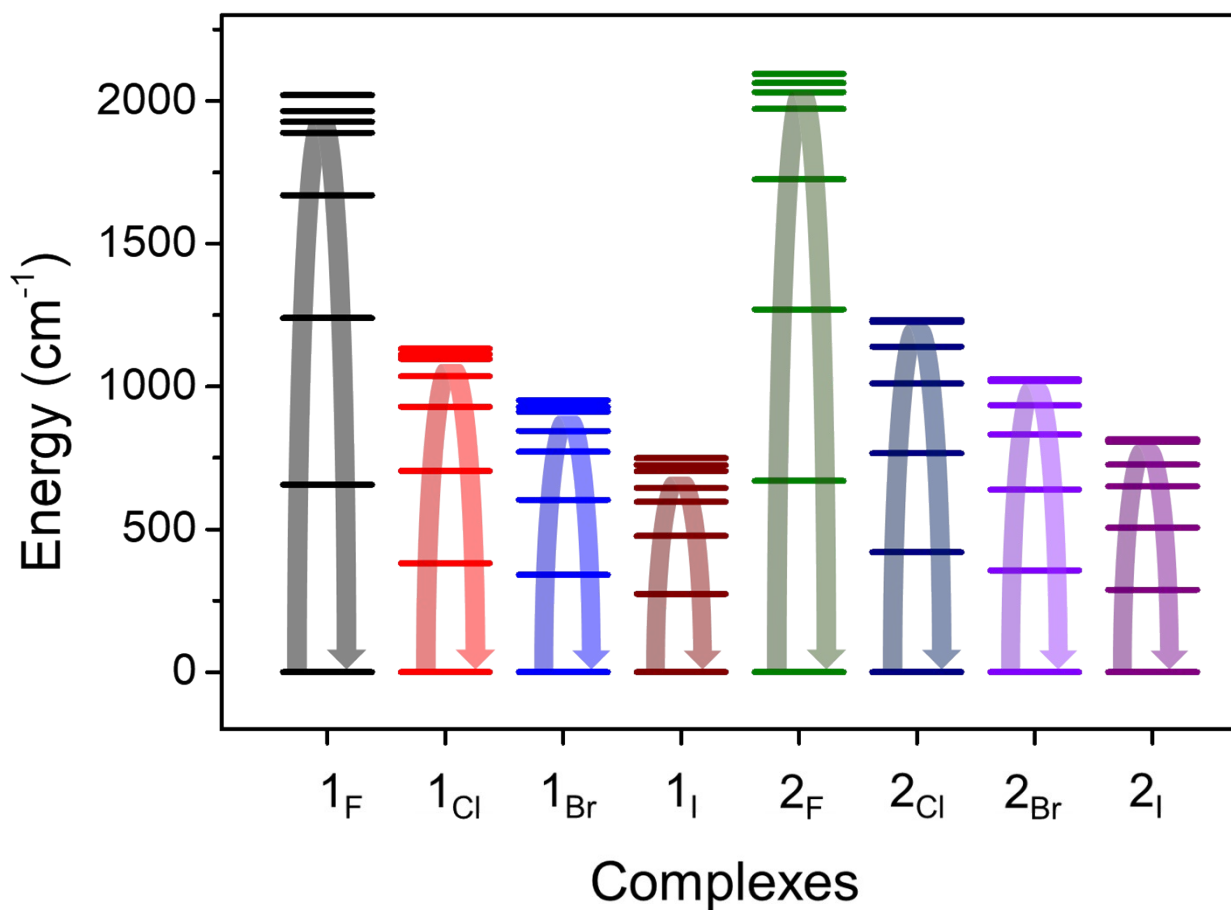

**Figure S14.** SINGLE\_ANISO computed span of the eight KDs for complexes **1<sub>x</sub>** and **2<sub>x</sub>**. The bold arrows indicate the probable relaxation pathway

## SUPPORTING INFORMATION

**Table S13.** SINGLE\_ANISO computed wave function decomposition analysis for the Dy(III) centre. The major dominating values are kept in bold.

| $\pm mJ$ | <i>wave function decomposition analysis 1<sub>F</sub></i>                           |
|----------|-------------------------------------------------------------------------------------|
| KD1      | <b>99.9 %</b> $ \pm 15/2\rangle$                                                    |
| KD2      | <b>99.8 %</b> $ \pm 13/2\rangle$                                                    |
| KD3      | <b>99.1 %</b> $ \pm 11/2\rangle$                                                    |
| KD4      | <b>93.6 %</b> $ \pm 9/2\rangle$                                                     |
| KD5      | <b>69.1 %</b> $ \pm 7/2\rangle$ + 15.7% $ \pm 5/2\rangle$ + 10.6% $ \pm 3/2\rangle$ |
| KD6      | <b>93.7 %</b> $ \pm 1/2\rangle$                                                     |
| KD7      | <b>73.2 %</b> $ \pm 3/2\rangle$ + 19.1% $ \pm 5/2\rangle$                           |
| KD8      | <b>60.5 %</b> $ \pm 5/2\rangle$ + 25.3% $ \pm 7/2\rangle$                           |
| $\pm mJ$ | <i>wave function decomposition analysis 1<sub>C1</sub></i>                          |
| KD1      | <b>99.9 %</b> $ \pm 15/2\rangle$                                                    |
| KD2      | <b>99.8 %</b> $ \pm 13/2\rangle$                                                    |
| KD3      | <b>99.1 %</b> $ \pm 11/2\rangle$                                                    |
| KD4      | <b>95.2 %</b> $ \pm 9/2\rangle$                                                     |
| KD5      | <b>71.4 %</b> $ \pm 7/2\rangle$ + 28.5% $ \pm 5/2\rangle$                           |
| KD6      | <b>93.7 %</b> $ \pm 1/2\rangle$                                                     |
| KD7      | <b>94.8 %</b> $ \pm 3/2\rangle$                                                     |
| KD8      | <b>71.3 %</b> $ \pm 5/2\rangle$ + 28.3% $ \pm 7/2\rangle$                           |
| $\pm mJ$ | <i>wave function decomposition analysis 1<sub>Br</sub></i>                          |
| KD1      | <b>99.9 %</b> $ \pm 15/2\rangle$                                                    |
| KD2      | <b>99.8 %</b> $ \pm 13/2\rangle$                                                    |
| KD3      | <b>99.1 %</b> $ \pm 11/2\rangle$                                                    |
| KD4      | <b>88.1 %</b> $ \pm 9/2\rangle$ + 8.5% $ \pm 3/2\rangle$                            |
| KD5      | <b>61.4 %</b> $ \pm 7/2\rangle$ + 35.1% $ \pm 5/2\rangle$                           |
| KD6      | <b>84.9 %</b> $ \pm 1/2\rangle$ + 11.3% $ \pm 3/2\rangle$                           |
| KD7      | <b>70.7 %</b> $ \pm 3/2\rangle$ + 13.6% $ \pm 1/2\rangle$                           |
| KD8      | <b>60.9 %</b> $ \pm 5/2\rangle$ + 30.7% $ \pm 7/2\rangle$                           |
| $\pm mJ$ | <i>wave function decomposition analysis 1<sub>I</sub></i>                           |
| KD1      | <b>99.9 %</b> $ \pm 15/2\rangle$                                                    |
| KD2      | <b>99.8 %</b> $ \pm 13/2\rangle$                                                    |
| KD3      | <b>99.1 %</b> $ \pm 11/2\rangle$                                                    |
| KD4      | <b>81.1 %</b> $ \pm 9/2\rangle$ + 13.2% $ \pm 3/2\rangle$                           |
| KD5      | <b>55.6 %</b> $ \pm 7/2\rangle$ + 39.0% $ \pm 5/2\rangle$                           |
| KD6      | <b>81.2 %</b> $ \pm 1/2\rangle$ + 11.5% $ \pm 3/2\rangle$                           |
| KD7      | <b>65.6 %</b> $ \pm 3/2\rangle$ + 14.8% $ \pm 1/2\rangle$ + 12.1% $ \pm 9/2\rangle$ |
| KD8      | <b>55.3 %</b> $ \pm 5/2\rangle$ + 35.0% $ \pm 7/2\rangle$                           |
| $\pm mJ$ | <i>wave function decomposition analysis 2<sub>F</sub></i>                           |
| KD1      | <b>99.9 %</b> $ \pm 15/2\rangle$                                                    |
| KD2      | <b>99.8 %</b> $ \pm 13/2\rangle$                                                    |
| KD3      | <b>99.1 %</b> $ \pm 11/2\rangle$                                                    |
| KD4      | <b>96.2 %</b> $ \pm 9/2\rangle$                                                     |
| KD5      | <b>78.5 %</b> $ \pm 7/2\rangle$ + 10.5% $ \pm 3/2\rangle$                           |
| KD6      | <b>91.5 %</b> $ \pm 1/2\rangle$ + 3.8% $ \pm 3/2\rangle$                            |

## SUPPORTING INFORMATION

|          |                                                                                                           |
|----------|-----------------------------------------------------------------------------------------------------------|
| KD7      | 67.6 % $ \pm 3/2\rangle$ + 22.1 % $ \pm 5/2\rangle$                                                       |
| KD8      | 63.3 % $ \pm 5/2\rangle$ + 17.6 % $ \pm 3/2\rangle$ + 15.7 % $ \pm 7/2\rangle$                            |
| $\pm mJ$ | <i>wave function decomposition analysis 2<sub>C1</sub></i>                                                |
| KD1      | 99.9 % $ \pm 15/2\rangle$                                                                                 |
| KD2      | 99.8 % $ \pm 13/2\rangle$                                                                                 |
| KD3      | 99.6 % $ \pm 11/2\rangle$                                                                                 |
| KD4      | 97.2 % $ \pm 9/2\rangle$                                                                                  |
| KD5      | 82.1 % $ \pm 7/2\rangle$ + 17.5 % $ \pm 5/2\rangle$                                                       |
| KD6      | 68.6 % $ \pm 1/2\rangle$ + 20.2 % $ \pm 3/2\rangle$                                                       |
| KD7      | 44.6 % $ \pm 5/2\rangle$ + 27.0 % $ \pm 1/2\rangle$ + 17.6 % $ \pm 3/2\rangle$ + 10.2 % $ \pm 7/2\rangle$ |
| KD8      | 60.3 % $ \pm 3/2\rangle$ + 29.1 % $ \pm 5/2\rangle$                                                       |

|          |                                                            |
|----------|------------------------------------------------------------|
| $\pm mJ$ | <i>wave function decomposition analysis 2<sub>Br</sub></i> |
| KD1      | 99.9 % $ \pm 15/2\rangle$                                  |
| KD2      | 99.8 % $ \pm 13/2\rangle$                                  |
| KD3      | 99.6 % $ \pm 11/2\rangle$                                  |
| KD4      | 97.4 % $ \pm 9/2\rangle$                                   |
| KD5      | 80.3 % $ \pm 7/2\rangle$ + 17.5 % $ \pm 5/2\rangle$        |
| KD6      | 78.6 % $ \pm 5/2\rangle$ + 19.2 % $ \pm 7/2\rangle$        |
| KD7      | 76.6 % $ \pm 1/2\rangle$ + 21.7 % $ \pm 3/2\rangle$        |
| KD8      | 74.2 % $ \pm 3/2\rangle$ + 22.3 % $ \pm 5/2\rangle$        |

|          |                                                           |
|----------|-----------------------------------------------------------|
| $\pm mJ$ | <i>wave function decomposition analysis 2<sub>I</sub></i> |
| KD1      | 99.9 % $ \pm 15/2\rangle$                                 |
| KD2      | 99.9 % $ \pm 13/2\rangle$                                 |
| KD3      | 99.4 % $ \pm 11/2\rangle$                                 |
| KD4      | 96.1 % $ \pm 9/2\rangle$                                  |
| KD5      | 76.8 % $ \pm 7/2\rangle$ + 23.1 % $ \pm 5/2\rangle$       |
| KD6      | 65.7 % $ \pm 5/2\rangle$ + 19.6 % $ \pm 7/2\rangle$       |
| KD7      | 58.8 % $ \pm 3/2\rangle$ + 27.7 % $ \pm 1/2\rangle$       |
| KD8      | 63.9 % $ \pm 1/2\rangle$ + 30.3 % $ \pm 3/2\rangle$       |

## SUPPORTING INFORMATION

**Table S14:** CASSCF-SO computed electronic states along with the corresponding g-tensor values for complexes **1<sub>X</sub>**. All the energies are reported in cm<sup>-1</sup>.

|                      |                      | <b>1<sub>F</sub></b>                             |                       |                       |                       | <b>1<sub>Cl</sub></b> |                                                  |                       |                       |                       |  |
|----------------------|----------------------|--------------------------------------------------|-----------------------|-----------------------|-----------------------|-----------------------|--------------------------------------------------|-----------------------|-----------------------|-----------------------|--|
|                      | Spin-free states     | SOC states<br>( <sup>6</sup> H <sub>15/2</sub> ) | g-values              |                       |                       | Spin-free states      | SOC states<br>( <sup>6</sup> H <sub>15/2</sub> ) | g-values              |                       |                       |  |
|                      |                      |                                                  | <i>g<sub>xx</sub></i> | <i>g<sub>yy</sub></i> | <i>g<sub>zz</sub></i> |                       |                                                  | <i>g<sub>xx</sub></i> | <i>g<sub>yy</sub></i> | <i>g<sub>zz</sub></i> |  |
| <b><sup>6</sup>H</b> | 0.0                  | 0.0                                              | 0.0000                | 0.0000                | 19.908                | 0.0                   | 0.0                                              | 0.0000                | 0.0000                | 19.9887               |  |
|                      | 0.2                  | 656.6                                            | 0.013                 | 0.014                 | 16.852                | 0.3                   | 381.3                                            | 0.0363                | 0.0363                | 17.0730               |  |
|                      | 1136.8               | 1239.3                                           | 0.024                 | 0.033                 | 13.925                | 660.5                 | 704.2                                            | 0.0000                | 0.0109                | 14.2109               |  |
|                      | 1173.0               | 1669.8                                           | 1.49                  | 1.65                  | 10.814                | 669.5                 | 929.6                                            | 0.0415                | 0.0462                | 10.9288               |  |
|                      | 1836.3               | 1889.0                                           | 7.563                 | 6.846                 | 4.7320                | 1002.7                | 1036.3                                           | 8.9575                | 8.9042                | 4.6530                |  |
|                      | 1855.1               | 1926.9                                           | 1.248                 | 6.726                 | 12.450                | 1093.4                | 1097.5                                           | 11.4708               | 9.7305                | 1.2547                |  |
|                      | 1899.1               | 1964.4                                           | 1.658                 | 3.321                 | 11.358                | 1134.8                | 1112.7                                           | 0.2804                | 1.4529                | 3.2461                |  |
|                      | 1990.9               | 2020.8                                           | 0.805                 | 2.642                 | 14.819                | 1141.5                | 1132.5                                           | 9.4810                | 8.3278                | 2.1069                |  |
|                      | 2085.9               |                                                  |                       |                       |                       | 1196.1                |                                                  |                       |                       |                       |  |
|                      | 2121.8               |                                                  |                       |                       |                       | 1216.5                |                                                  |                       |                       |                       |  |
|                      | 2150.3               |                                                  |                       |                       |                       | 1233.6                |                                                  |                       |                       |                       |  |
|                      | <b><sup>6</sup>F</b> | 8549.3                                           |                       |                       |                       |                       | 7967.3                                           |                       |                       |                       |  |
|                      |                      | 8741.0                                           |                       |                       |                       |                       | 8100.2                                           |                       |                       |                       |  |
|                      |                      | 8820.0                                           |                       |                       |                       |                       | 8113.9                                           |                       |                       |                       |  |
|                      |                      | 9030.7                                           |                       |                       |                       |                       | 8244.7                                           |                       |                       |                       |  |
| 9118.9               |                      |                                                  |                       |                       |                       | 8330.8                |                                                  |                       |                       |                       |  |
| 9152.4               |                      |                                                  |                       |                       |                       | 8332.5                |                                                  |                       |                       |                       |  |
| <b><sup>6</sup>P</b> | 9154.0               |                                                  |                       |                       |                       | 8349.3                |                                                  |                       |                       |                       |  |
|                      | 34094.1              |                                                  |                       |                       |                       | 34130.2               |                                                  |                       |                       |                       |  |
|                      | 36446.2              |                                                  |                       |                       |                       | 35421.5               |                                                  |                       |                       |                       |  |
|                      | 36572.4              |                                                  |                       |                       |                       | 35439.6               |                                                  |                       |                       |                       |  |
|                      |                      | <b>1<sub>Br</sub></b>                            |                       |                       |                       | <b>1<sub>I</sub></b>  |                                                  |                       |                       |                       |  |
|                      | Spin-free states     | SOC states<br>( <sup>6</sup> H <sub>15/2</sub> ) | g-values              |                       |                       | Spin-free states      | SOC states<br>( <sup>6</sup> H <sub>15/2</sub> ) | g-values              |                       |                       |  |
|                      |                      |                                                  | <i>g<sub>xx</sub></i> | <i>g<sub>yy</sub></i> | <i>g<sub>zz</sub></i> |                       |                                                  | <i>g<sub>xx</sub></i> | <i>g<sub>yy</sub></i> | <i>g<sub>zz</sub></i> |  |
| <b><sup>6</sup>H</b> | 0.0                  | 0.0                                              | 0.0000                | 0.0001                | 19.9061               | 0.0                   | 0.0                                              | 0.0001                | 0.0002                | 19.9037               |  |
|                      | 0.4                  | 340.5                                            | 0.0753                | 0.0767                | 17.0487               | 1.0                   | 274.3                                            | 0.1374                | 0.1402                | 17.0642               |  |
|                      | 539.1                | 603.7                                            | 0.0209                | 0.0377                | 14.1676               | 423.0                 | 476.6                                            | 0.0728                | 0.1068                | 14.0619               |  |
|                      | 546.5                | 771.4                                            | 0.8044                | 0.8337                | 10.4995               | 430.3                 | 596.4                                            | 1.6088                | 1.6887                | 9.7093                |  |
|                      | 781.8                | 844.6                                            | 9.9871                | 8.6139                | 3.7590                | 583.3                 | 644.8                                            | 11.0579               | 7.9600                | 2.9970                |  |
|                      | 893.6                | 911.1                                            | 12.5885               | 7.9902                | 0.8969                | 692.5                 | 703.8                                            | 0.6348                | 4.3812                | 15.7730               |  |
|                      | 922.4                | 928.8                                            | 0.5221                | 1.4315                | 4.8815                | 712.5                 | 725.6                                            | 0.7425                | 1.5111                | 10.2720               |  |
|                      | 927.1                | 951.5                                            | 11.0494               | 8.2824                | 0.3990                | 723.5                 | 749.5                                            | 0.0354                | 5.3525                | 13.8691               |  |
|                      | 972.2                |                                                  |                       |                       |                       | 765.5                 |                                                  |                       |                       |                       |  |
|                      | 983.6                |                                                  |                       |                       |                       | 776.4                 |                                                  |                       |                       |                       |  |
|                      | 1003.0               |                                                  |                       |                       |                       | 799.5                 |                                                  |                       |                       |                       |  |
|                      | <b><sup>6</sup>F</b> | 7836.6                                           |                       |                       |                       |                       | 7713.8                                           |                       |                       |                       |  |
|                      |                      | 7940.3                                           |                       |                       |                       |                       | 7795.8                                           |                       |                       |                       |  |
|                      |                      | 7949.6                                           |                       |                       |                       |                       | 7802.8                                           |                       |                       |                       |  |
|                      |                      | 8052.7                                           |                       |                       |                       |                       | 7872.1                                           |                       |                       |                       |  |
| 8133.3               |                      |                                                  |                       |                       |                       | 7954.3                |                                                  |                       |                       |                       |  |
| 8134.6               |                      |                                                  |                       |                       |                       | 7958.2                |                                                  |                       |                       |                       |  |
| 8157.3               |                      |                                                  |                       |                       |                       | 7978.9                |                                                  |                       |                       |                       |  |
| <b><sup>6</sup>P</b> |                      | 34145.1                                          |                       |                       |                       |                       | 34163.1                                          |                       |                       |                       |  |
|                      | 35168.2              |                                                  |                       |                       |                       | 34923.4               |                                                  |                       |                       |                       |  |
|                      | 35179.0              |                                                  |                       |                       |                       | 34944.7               |                                                  |                       |                       |                       |  |

## SUPPORTING INFORMATION

**Table S15:** CASSCF-SO computed electronic states along with the corresponding g-tensor values for complexes  $2_X$ . All the energies are reported in  $\text{cm}^{-1}$ .

|         |                  | $2_F$                         |          |          |          |                  | $2_{Cl}$                      |          |          |          |  |
|---------|------------------|-------------------------------|----------|----------|----------|------------------|-------------------------------|----------|----------|----------|--|
|         | Spin-free states | SOC states ( ${}^6H_{15/2}$ ) | g-values |          |          | Spin-free states | SOC states ( ${}^6H_{15/2}$ ) | g-values |          |          |  |
|         |                  |                               | $g_{xx}$ | $g_{yy}$ | $g_{zz}$ |                  |                               | $g_{xx}$ | $g_{yy}$ | $g_{zz}$ |  |
| ${}^6H$ | 0.0              | 0.0                           | 0.0000   | 0.0000   | 19.9125  | 0.0              | 0.0                           | 0.0000   | 0.0000   | 19.9136  |  |
|         | 0.1              | 669.9                         | 0.0055   | 0.0059   | 16.8494  | 0.0              | 419.9                         | 0.0180   | 0.0180   | 17.0260  |  |
|         | 1175.4           | 1270.1                        | 0.0156   | 0.0184   | 13.9389  | 692.2            | 766.5                         | 0.0024   | 0.0027   | 14.2373  |  |
|         | 1198.6           | 1725.2                        | 0.8372   | 0.9086   | 11.1207  | 692.7            | 1010.6                        | 0.0310   | 0.0317   | 11.3634  |  |
|         | 1945.7           | 1972.2                        | 4.7549   | 5.0858   | 7.6711   | 1079.1           | 1140.1                        | 7.5278   | 7.4780   | 6.3101   |  |
|         | 1948.7           | 2031.0                        | 1.3467   | 6.5775   | 12.1897  | 1207.9           | 1225.4                        | 11.9517  | 8.2262   | 1.2920   |  |
|         | 1993.9           | 2062.8                        | 1.6902   | 2.5731   | 11.9714  | 1211.4           | 1227.8                        | 1.6505   | 3.0200   | 5.5334   |  |
|         | 2084.7           | 2094.7                        | 0.2218   | 3.4581   | 14.6005  | 1239.8           | 1233.5                        | 0.5055   | 3.4086   | 13.1868  |  |
|         | 2128.9           |                               |          |          |          | 1241.3           |                               |          |          |          |  |
|         | 2204.3           |                               |          |          |          | 1281.9           |                               |          |          |          |  |
|         | 2221.5           |                               |          |          |          | 1283.3           |                               |          |          |          |  |
|         | ${}^6F$          | 8613.7                        |          |          |          |                  | 8019.1                        |          |          |          |  |
|         |                  | 8805.4                        |          |          |          |                  | 8152.8                        |          |          |          |  |
| 8881.8  |                  |                               |          |          |          | 8154.1           |                               |          |          |          |  |
| 9130.5  |                  |                               |          |          |          | 8342.5           |                               |          |          |          |  |
| 9187.8  |                  |                               |          |          |          | 8380.8           |                               |          |          |          |  |
| 9220.4  |                  |                               |          |          |          | 8381.2           |                               |          |          |          |  |
| 9221.8  |                  |                               |          |          |          | 8407.5           |                               |          |          |          |  |
| ${}^6P$ | 34048.5          |                               |          |          |          | 34082.5          |                               |          |          |          |  |
|         | 36552.1          |                               |          |          |          | 35529.9          |                               |          |          |          |  |
|         | 36677.9          |                               |          |          |          | 35531.1          |                               |          |          |          |  |

  

|         |                  | $2_{Br}$                      |          |          |          |                  | $2_I$                         |          |          |          |  |
|---------|------------------|-------------------------------|----------|----------|----------|------------------|-------------------------------|----------|----------|----------|--|
|         | Spin-free states | SOC states ( ${}^6H_{15/2}$ ) | g-values |          |          | Spin-free states | SOC states ( ${}^6H_{15/2}$ ) | g-values |          |          |  |
|         |                  |                               | $g_{xx}$ | $g_{yy}$ | $g_{zz}$ |                  |                               | $g_{xx}$ | $g_{yy}$ | $g_{zz}$ |  |
| ${}^6H$ | 0.0              | 0.0                           | 0.0000   | 0.0000   | 19.9129  | 0.0              | 0.0                           | 0.0000   | 0.0000   | 19.9117  |  |
|         | 0.0              | 356.4                         | 0.0278   | 0.0278   | 17.0608  | 0.1              | 288.7                         | 0.0484   | 0.0486   | 17.0929  |  |
|         | 580.0            | 638.8                         | 0.0010   | 0.0052   | 14.2848  | 462.7            | 506.4                         | 0.0001   | 0.0140   | 14.3109  |  |
|         | 580.1            | 832.3                         | 0.0222   | 0.0241   | 11.3214  | 463.7            | 650.8                         | 0.1754   | 0.1901   | 11.1871  |  |
|         | 864.0            | 934.6                         | 7.8358   | 7.8218   | 6.0715   | 650.7            | 725.9                         | 8.4398   | 8.1837   | 5.5449   |  |
|         | 1000.6           | 1019.7                        | 8.3725   | 7.3556   | 3.3424   | 792.0            | 806.0                         | 2.3226   | 3.4460   | 13.7723  |  |
|         | 1018.6           | 1023.5                        | 0.9274   | 6.2743   | 13.9724  | 816.3            | 810.8                         | 1.5030   | 4.9108   | 13.8273  |  |
|         | 1036.9           | 1024.8                        | 1.3967   | 4.4024   | 12.1765  | 822.5            | 814.6                         | 0.1219   | 0.6653   | 18.4632  |  |
|         | 1038.0           |                               |          |          |          | 824.3            |                               |          |          |          |  |
|         | 1053.5           |                               |          |          |          | 825.6            |                               |          |          |          |  |
|         | 1053.8           |                               |          |          |          | 827.3            |                               |          |          |          |  |
|         | ${}^6F$          | 7893.4                        |          |          |          |                  | 7766.7                        |          |          |          |  |
|         |                  | 7994.9                        |          |          |          |                  | 7838.1                        |          |          |          |  |
| 7995.1  |                  |                               |          |          |          | 7839.2           |                               |          |          |          |  |
| 8156.0  |                  |                               |          |          |          | 7966.0           |                               |          |          |          |  |
| 8187.6  |                  |                               |          |          |          | 7996.1           |                               |          |          |          |  |
| 8187.9  |                  |                               |          |          |          | 7996.8           |                               |          |          |          |  |
| 8222.0  |                  |                               |          |          |          | 8034.4           |                               |          |          |          |  |
| ${}^6P$ | 34093.3          |                               |          |          |          | 34104.4          |                               |          |          |          |  |
|         | 35275.9          |                               |          |          |          | 35017.2          |                               |          |          |          |  |
|         | 35277.5          |                               |          |          |          | 35023.9          |                               |          |          |          |  |

## SUPPORTING INFORMATION

**Table S16:** CASSCF-SO computed electronic states along with the corresponding g-tensor values for complex **3<sub>Cl</sub>**. All the energies are reported in cm<sup>-1</sup>.

| <b>3<sub>Cl</sub></b> |                      |                                               |                       |                       |                       |  |
|-----------------------|----------------------|-----------------------------------------------|-----------------------|-----------------------|-----------------------|--|
|                       | Spin-free states     | SOC states ( <sup>6</sup> H <sub>15/2</sub> ) | g-values              |                       |                       |  |
|                       |                      |                                               | <i>g<sub>xx</sub></i> | <i>g<sub>yy</sub></i> | <i>g<sub>zz</sub></i> |  |
| <b><sup>6</sup>H</b>  | 0.0                  | 0.0                                           | 0.0000                | 0.0000                | 19.9152               |  |
|                       | 0.0                  | 409.3                                         | 0.0110                | 0.0111                | 17.0370               |  |
|                       | 673.5                | 751.7                                         | 0.0019                | 0.0031                | 14.2614               |  |
|                       | 675.2                | 997.0                                         | 0.1073                | 0.1097                | 11.4962               |  |
|                       | 1076.0               | 1133.3                                        | 6.0365                | 6.4373                | 7.5466                |  |
|                       | 1179.3               | 1212.6                                        | 2.3665                | 3.8895                | 11.4658               |  |
|                       | 1206.0               | 1221.2                                        | 10.3668 7.1210 1.7952 |                       |                       |  |
|                       | 1233.9               | 1228.0                                        | 0.2352                | 2.5069                | 14.4334               |  |
|                       | 1235.7               |                                               |                       |                       |                       |  |
|                       | 1269.7               |                                               |                       |                       |                       |  |
|                       | 1272.0               |                                               |                       |                       |                       |  |
|                       | <b><sup>6</sup>F</b> | 8012.4                                        |                       |                       |                       |  |
|                       |                      | 8143.4                                        |                       |                       |                       |  |
| 8148.2                |                      |                                               |                       |                       |                       |  |
| 8341.1                |                      |                                               |                       |                       |                       |  |
| 8364.1                |                      |                                               |                       |                       |                       |  |
| 8394.2                |                      |                                               |                       |                       |                       |  |
| <b><sup>6</sup>P</b>  | 34077.3              |                                               |                       |                       |                       |  |
|                       | 35520.2              |                                               |                       |                       |                       |  |
|                       | 35527.9              |                                               |                       |                       |                       |  |

**Table S17:** CASSCF-SO computed electronic states along with the corresponding g-tensor values for complexes **4<sub>Cl</sub>** and **5<sub>Cl</sub>**. All the energies are reported in cm<sup>-1</sup>.

|                      | <b>4<sub>Cl</sub></b> |                                               |                       |                       |                       | <b>5<sub>Cl</sub></b> |                                               |                       |                       |                       |  |
|----------------------|-----------------------|-----------------------------------------------|-----------------------|-----------------------|-----------------------|-----------------------|-----------------------------------------------|-----------------------|-----------------------|-----------------------|--|
|                      | Spin-free states      | SOC states ( <sup>6</sup> H <sub>15/2</sub> ) | g-values              |                       |                       | Spin-free states      | SOC states ( <sup>6</sup> H <sub>15/2</sub> ) | g-values              |                       |                       |  |
|                      |                       |                                               | <i>g<sub>xx</sub></i> | <i>g<sub>yy</sub></i> | <i>g<sub>zz</sub></i> |                       |                                               | <i>g<sub>xx</sub></i> | <i>g<sub>yy</sub></i> | <i>g<sub>zz</sub></i> |  |
| <b><sup>6</sup>H</b> | 0.0                   | 0.0                                           | 0.0005                | 0.0006                | 19.9065               | 0.0                   | 0.0                                           | 0.0003                | 0.0004                | 19.9094               |  |
|                      | 1.2                   | 366.4                                         | 0.0166                | 0.0195                | 17.0398               | 0.0                   | 389.3                                         | 0.0172                | 0.0190                | 17.0362               |  |
|                      | 583.6                 | 662.2                                         | 0.2000                | 0.2357                | 14.1929               | 628.9                 | 711.5                                         | 0.0710                | 0.0784                | 14.2275               |  |
|                      | 604.5                 | 860.0                                         | 1.9287                | 2.4332                | 10.7432               | 642.5                 | 934.3                                         | 1.7951                | 2.1743                | 11.0573               |  |
|                      | 910.3                 | 942.9                                         | 3.4067                | 4.0970                | 13.9480               | 996.1                 | 1043.0                                        | 9.2195                | 5.9871                | 1.7879                |  |
|                      | 943.0                 | 997.7                                         | 0.5206                | 0.7962                | 12.9197               | 1049.1                | 1072.4                                        | 0.8218                | 3.6987                | 10.9060               |  |
|                      | 963.8                 | 1143.1                                        | 0.0339                | 0.0416                | 16.7190               | 1066.0                | 1191.6                                        | 0.0700                | 0.2596                | 16.6122               |  |
|                      | 1112.4                | 1233.6                                        | 0.0517                | 0.1207                | 19.3538               | 1164.5                | 1265.2                                        | 0.0802                | 0.2380                | 19.2359               |  |
|                      | 1138.2                |                                               |                       |                       |                       | 1201.3                |                                               |                       |                       |                       |  |
|                      | 1259.9                |                                               |                       |                       |                       | 1290.3                |                                               |                       |                       |                       |  |
|                      | 1268.9                |                                               |                       |                       |                       | 1301.7                |                                               |                       |                       |                       |  |
|                      | <b><sup>6</sup>F</b>  | 7936.1                                        |                       |                       |                       |                       | 7973.0                                        |                       |                       |                       |  |
|                      |                       | 8025.0                                        |                       |                       |                       |                       | 8087.0                                        |                       |                       |                       |  |
|                      |                       | 8065.4                                        |                       |                       |                       |                       | 8112.1                                        |                       |                       |                       |  |
|                      |                       | 8213.8                                        |                       |                       |                       |                       | 8267.9                                        |                       |                       |                       |  |
|                      |                       | 8236.9                                        |                       |                       |                       |                       | 8302.7                                        |                       |                       |                       |  |
|                      |                       | 8275.2                                        |                       |                       |                       |                       | 8331.1                                        |                       |                       |                       |  |
| 8300.8               |                       |                                               |                       |                       |                       | 8351.7                |                                               |                       |                       |                       |  |
| <b><sup>6</sup>P</b> | 34088.1               |                                               |                       |                       |                       | 34081.1               |                                               |                       |                       |                       |  |
|                      | 35218.2               |                                               |                       |                       |                       | 35329.3               |                                               |                       |                       |                       |  |
|                      | 35527.4               |                                               |                       |                       |                       | 35552.0               |                                               |                       |                       |                       |  |



## SUPPORTING INFORMATION

**Table S18:** CASSCF-SO computed electronic states along with the corresponding g-tensor values for complexes  $2_{\text{OSiPh}_3}$  and  $2_{\text{OtBu}}$ . All the energies are reported in  $\text{cm}^{-1}$ .

| $2_{\text{OSiPh}_3}$ |                  |                                      |          |          |          | $2_{\text{OtBu}}$ |                                      |          |          |          |  |
|----------------------|------------------|--------------------------------------|----------|----------|----------|-------------------|--------------------------------------|----------|----------|----------|--|
|                      | Spin-free states | SOC states ( ${}^6\text{H}_{15/2}$ ) | g-values |          |          | Spin-free states  | SOC states ( ${}^6\text{H}_{15/2}$ ) | g-values |          |          |  |
|                      |                  |                                      | $g_{xx}$ | $g_{yy}$ | $g_{zz}$ |                   |                                      | $g_{xx}$ | $g_{yy}$ | $g_{zz}$ |  |
| ${}^6\text{H}$       | 0.0              | 0.0                                  | 0.0001   | 0.0001   | 19.9049  | 0.0               | 0                                    | 0.0000   | 0.0000   | 19.9130  |  |
|                      | 2.4              | 660.1                                | 0.0115   | 0.0122   | 16.8464  | 0.3               | 833.99                               | 0.0052   | 0.0053   | 16.7242  |  |
|                      | 1156.7           | 1241.6                               | 0.0423   | 0.0459   | 13.9487  | 1578              | 1559.27                              | 0.0033   | 0.0053   | 13.8046  |  |
|                      | 1179.2           | 1675.2                               | 0.7237   | 0.8097   | 11.0998  | 1582.1            | 2101.02                              | 0.1056   | 0.1117   | 11.1394  |  |
|                      | 1872.5           | 1903.4                               | 5.3751   | 6.5948   | 8.7957   | 2377.4            | 2397.26                              | 5.9227   | 6.0617   | 7.3204   |  |
|                      | 1900.8           | 1964.4                               | 0.1571   | 0.6900   | 18.0540  | 2395.9            | 2509.84                              | 1.1373   | 6.1760   | 14.4334  |  |
|                      | 1958.9           | 2008.2                               | 1.6377   | 3.4017   | 14.9172  | 2495.8            | 2527.39                              | 0.6156   | 3.1382   | 9.8689   |  |
|                      | 2008.6           | 2049.0                               | 0.5205   | 2.2836   | 15.6530  | 2508.6            | 2534.07                              | 10.9462  | 6.1256   | 0.6744   |  |
|                      | 2057.2           |                                      |          |          |          | 2525.8            |                                      |          |          |          |  |
|                      | 2153.7           |                                      |          |          |          | 2658.9            |                                      |          |          |          |  |
|                      | 2160.0           |                                      |          |          |          | 2662.2            |                                      |          |          |          |  |
|                      | ${}^6\text{F}$   | 8570.6                               |          |          |          |                   | 9084.5                               |          |          |          |  |
|                      |                  | 8759.9                               |          |          |          |                   | 9228.4                               |          |          |          |  |
|                      |                  | 8797.3                               |          |          |          |                   | 9234.9                               |          |          |          |  |
|                      |                  | 9036.8                               |          |          |          |                   | 9553.6                               |          |          |          |  |
| 9114.7               |                  |                                      |          |          |          | 9619.5            |                                      |          |          |          |  |
| 9147.2               |                  |                                      |          |          |          | 9666.6            |                                      |          |          |          |  |
| 9153.9               |                  |                                      |          |          |          | 9667.6            |                                      |          |          |          |  |
| ${}^6\text{P}$       | 33992.4          |                                      |          |          |          | 34023.4           |                                      |          |          |          |  |
|                      | 36411.4          |                                      |          |          |          | 37153.7           |                                      |          |          |          |  |
|                      | 36477.0          |                                      |          |          |          | 37170.8           |                                      |          |          |          |  |

**Table S19:** SINGLE\_ANISO computed crystal field parameters for  $1_X-5_X$ .

| k | q  | $B_k^q$          |                  |                  |                  |
|---|----|------------------|------------------|------------------|------------------|
|   |    | $1_F$            | $1_{Cl}$         | $1_{Br}$         | $1_I$            |
| 2 | -2 | -7.01E-01        | 2.62E-03         | 1.38E-01         | -3.97E-01        |
| 2 | -1 | 4.01E-02         | -7.13E-02        | -6.90E-01        | -1.54E+00        |
| 2 | 0  | <b>-2.66E+01</b> | <b>-1.50E+01</b> | <b>-1.24E+01</b> | <b>-9.52E+00</b> |
| 2 | 1  | 1.24E+00         | -1.35E-02        | 1.62E+00         | -2.88E-01        |
| 2 | 2  | -2.37E+00        | 4.14E-02         | -2.02E-01        | -1.15E-01        |
| 4 | -4 | 1.96E-04         | 9.26E-05         | -2.68E-03        | -5.95E-03        |
| 4 | -3 | 2.89E-04         | -1.12E-03        | -3.00E-03        | 6.88E-03         |
| 4 | -2 | -2.05E-02        | 4.45E-05         | 5.53E-04         | 2.89E-03         |
| 4 | -1 | -2.85E-04        | 1.15E-03         | 1.13E-02         | 2.57E-02         |
| 4 | 0  | <b>-1.29E-01</b> | <b>-6.15E-02</b> | <b>-5.37E-02</b> | <b>-4.34E-02</b> |
| 4 | 1  | -2.36E-02        | 2.11E-04         | -2.71E-02        | 3.69E-03         |
| 4 | 2  | -7.70E-02        | -1.71E-04        | -5.11E-03        | 3.00E-03         |
| 4 | 3  | 1.91E-02         | -3.63E-04        | 9.42E-03         | -2.00E-03        |
| 4 | 4  | -3.11E-03        | 1.28E-03         | 2.32E-03         | 3.21E-03         |
| 6 | -6 | -1.79E-03        | -4.80E-03        | <b>8.66E-03</b>  | <b>-2.22E-03</b> |
| 6 | -5 | 6.06E-04         | -1.52E-04        | -4.56E-03        | 3.96E-03         |
| 6 | -4 | 8.46E-05         | 1.28E-06         | 3.58E-05         | -9.49E-05        |
| 6 | -3 | 1.53E-05         | -9.83E-06        | -2.30E-05        | 3.59E-05         |
| 6 | -2 | 8.56E-04         | 3.29E-06         | -2.42E-04        | 3.65E-04         |
| 6 | -1 | -2.17E-05        | 1.24E-05         | 1.38E-04         | 3.71E-04         |
| 6 | 0  | 1.24E-03         | 5.41E-04         | 3.00E-04         | 1.71E-04         |
| 6 | 1  | -1.73E-05        | 2.77E-06         | -3.17E-04        | 1.14E-04         |
| 6 | 2  | 3.13E-03         | -7.16E-06        | 3.55E-04         | 2.87E-05         |
| 6 | 3  | 2.87E-04         | -3.49E-06        | 9.43E-05         | -4.36E-05        |
| 6 | 4  | 7.79E-06         | 2.21E-05         | 4.25E-05         | 1.62E-04         |
| 6 | 5  | 3.41E-03         | -6.45E-05        | -8.89E-04        | -1.61E-03        |
| 6 | 6  | <b>-9.97E-03</b> | <b>7.40E-03</b>  | 5.74E-03         | -1.03E-02        |
| 8 | -8 | -2.91E-06        | 3.06E-08         | 3.79E-07         | -9.15E-07        |

## SUPPORTING INFORMATION

|       |     |                 |                  |                  |                 |
|-------|-----|-----------------|------------------|------------------|-----------------|
| 8     | -7  | 1.08E-06        | 6.71E-08         | -1.28E-06        | -1.89E-06       |
| 8     | -6  | -9.51E-06       | -1.35E-05        | 2.09E-05         | -4.20E-06       |
| 8     | -5  | 9.19E-06        | -1.17E-06        | <b>-3.03E-05</b> | <b>2.04E-05</b> |
| 8     | -4  | 6.04E-07        | 9.72E-09         | 2.41E-07         | -4.03E-07       |
| 8     | -3  | -4.87E-07       | -1.33E-07        | -1.67E-07        | 5.07E-07        |
| 8     | -2  | 5.47E-06        | 2.68E-08         | -1.06E-06        | 1.44E-06        |
| 8     | -1  | -5.14E-08       | 4.46E-08         | 3.56E-07         | 6.35E-07        |
| 8     | 0   | 4.96E-07        | 1.06E-07         | -6.62E-08        | -8.90E-08       |
| 8     | 1   | -1.15E-06       | 8.78E-09         | -8.21E-07        | 1.26E-07        |
| 8     | 2   | 1.94E-05        | -7.21E-08        | 1.05E-06         | 3.75E-07        |
| 8     | 3   | <b>5.36E-06</b> | -4.56E-08        | 9.34E-07         | -3.77E-07       |
| 8     | 4   | -2.07E-06       | 1.56E-07         | 2.76E-07         | 6.65E-07        |
| 8     | 5   | 5.16E-05        | -4.96E-07        | -5.89E-06        | -8.18E-06       |
| 8     | 6   | -5.24E-05       | <b>2.09E-05</b>  | 1.39E-05         | -1.94E-05       |
| 8     | 7   | 2.86E-06        | 6.35E-08         | -1.88E-06        | -5.58E-07       |
| 8     | 8   | -5.91E-06       | -6.80E-08        | 6.48E-07         | 4.75E-09        |
| <hr/> |     |                 |                  |                  |                 |
| 10    | -10 | 1.61E-08        | -3.53E-09        | 2.31E-09         | 2.64E-08        |
| 10    | -9  | 1.99E-08        | -2.35E-09        | -7.85E-09        | 3.19E-09        |
| 10    | -8  | 2.95E-07        | -9.88E-10        | -4.65E-08        | 6.97E-08        |
| 10    | -7  | -6.86E-08       | -1.39E-09        | 5.59E-08         | 9.65E-08        |
| 10    | -6  | 1.00E-07        | 1.41E-07         | <b>-1.62E-07</b> | 2.84E-08        |
| 10    | -5  | -2.73E-08       | 3.33E-09         | 6.02E-08         | -3.27E-08       |
| 10    | -4  | -7.41E-08       | -2.10E-10        | -2.88E-08        | -7.38E-09       |
| 10    | -3  | -1.18E-08       | 1.22E-09         | 2.47E-08         | -1.04E-09       |
| 10    | -2  | -4.49E-08       | -5.46E-11        | 5.22E-09         | -6.72E-09       |
| 10    | -1  | 2.14E-09        | 4.43E-11         | -1.85E-09        | -5.53E-09       |
| 10    | 0   | -2.15E-08       | -5.94E-09        | -2.74E-09        | -1.28E-09       |
| 10    | 1   | -8.07E-09       | -2.61E-12        | 4.33E-09         | -2.38E-09       |
| 10    | 2   | -1.63E-07       | 8.19E-11         | -8.60E-09        | -7.40E-10       |
| 10    | 3   | -1.81E-07       | 4.24E-10         | -1.83E-08        | -1.16E-08       |
| 10    | 4   | 1.21E-07        | -3.67E-09        | -8.17E-09        | -1.25E-08       |
| 10    | 5   | -1.52E-07       | 1.43E-09         | 1.21E-08         | 1.11E-08        |
| 10    | 6   | 5.47E-07        | <b>-2.17E-07</b> | -1.07E-07        | <b>1.34E-07</b> |
| 10    | 7   | -1.17E-07       | -1.49E-09        | 7.30E-08         | 2.78E-08        |
| 10    | 8   | <b>6.23E-07</b> | 3.80E-10         | -9.56E-08        | -1.86E-08       |
| 10    | 9   | 2.29E-08        | -2.36E-09        | 7.50E-09         | 1.89E-08        |
| 10    | 10  | 4.76E-08        | 6.62E-09         | 1.76E-08         | -1.79E-08       |

$$H_{CF} = \sum_{k=-q}^q B_k^q O_k^q$$

The CF parameters were computed using the following equation, and here  $B_k^q$  and  $O_k^q$  are the crystal field parameters and Steven's operator, respectively.

| k     | q  | $B_k^q$          |                  |                  |                  |
|-------|----|------------------|------------------|------------------|------------------|
|       |    | $2_F$            | $2_{Cl}$         | $2_{Br}$         | $2_I$            |
| 2     | -2 | 1.21E+00         | -1.10E-02        | -1.33E-02        | 1.27E-01         |
| 2     | -1 | 1.37E+00         | -4.60E-01        | -3.79E-02        | 1.60E-01         |
| 2     | 0  | <b>-2.81E+01</b> | <b>-1.69E+01</b> | <b>-1.40E+01</b> | <b>-1.10E+01</b> |
| 2     | 1  | -1.43E-01        | -5.48E-01        | -1.66E-01        | 3.79E-02         |
| 2     | 2  | 2.11E+00         | -2.41E-02        | 2.45E-02         | -2.93E-02        |
| <hr/> |    |                  |                  |                  |                  |
| 4     | -4 | -1.17E-03        | -2.58E-04        | 2.07E-04         | 1.24E-03         |
| 4     | -3 | 2.21E-03         | 1.60E-04         | -1.30E-04        | -1.30E-04        |
| 4     | -2 | 3.98E-02         | -1.31E-03        | 2.01E-04         | -5.32E-04        |
| 4     | -1 | -2.47E-02        | 6.03E-03         | 4.96E-04         | -1.96E-03        |
| 4     | 0  | <b>-1.27E-01</b> | <b>-6.25E-02</b> | <b>-4.93E-02</b> | <b>-3.72E-02</b> |
| 4     | 1  | 3.31E-03         | 7.44E-03         | 1.94E-03         | -4.83E-04        |
| 4     | 2  | 6.98E-02         | -8.56E-04        | -2.13E-04        | 5.23E-05         |
| 4     | 3  | -1.20E-03        | -4.83E-05        | -1.17E-05        | -3.90E-05        |
| 4     | 4  | -3.51E-03        | 7.09E-04         | 6.43E-04         | 6.46E-05         |

## SUPPORTING INFORMATION

|    |     |                 |                  |                  |                  |
|----|-----|-----------------|------------------|------------------|------------------|
| 6  | -6  | 4.68E-03        | -4.21E-03        | 4.92E-03         | -3.66E-03        |
| 6  | -5  | 1.77E-03        | 9.79E-05         | 2.69E-04         | -2.43E-04        |
| 6  | -4  | 9.80E-05        | -1.09E-07        | 4.97E-06         | 2.88E-05         |
| 6  | -3  | -8.89E-05       | -1.36E-06        | -3.95E-06        | -2.05E-06        |
| 6  | -2  | -1.54E-03       | 3.51E-05         | -3.66E-06        | -1.45E-05        |
| 6  | -1  | -8.23E-05       | 1.59E-04         | 1.33E-05         | -6.96E-05        |
| 6  | 0   | 1.23E-03        | 4.64E-04         | 2.58E-04         | 8.51E-05         |
| 6  | 1   | -1.81E-05       | 1.75E-04         | 7.45E-05         | -1.48E-05        |
| 6  | 2   | -2.67E-03       | 3.23E-05         | 7.61E-07         | 5.24E-06         |
| 6  | 3   | 6.35E-05        | -1.37E-07        | -5.78E-07        | -7.86E-07        |
| 6  | 4   | -6.31E-05       | 1.03E-05         | 1.36E-05         | 3.68E-07         |
| 6  | 5   | -1.33E-03       | -1.20E-03        | -1.85E-04        | 2.17E-04         |
| 6  | 6   | <b>5.06E-03</b> | <b>-5.68E-03</b> | <b>-5.20E-03</b> | <b>-6.31E-03</b> |
| 8  | -8  | -4.13E-06       | -7.58E-08        | -3.32E-08        | 1.52E-07         |
| 8  | -7  | -1.03E-06       | -6.90E-07        | 1.02E-07         | 1.65E-07         |
| 8  | -6  | 2.51E-05        | -1.30E-05        | 1.23E-05         | -7.10E-06        |
| 8  | -5  | 2.75E-05        | 8.07E-07         | 1.83E-06         | -1.27E-06        |
| 8  | -4  | 7.25E-08        | -6.55E-09        | 3.12E-08         | 1.43E-07         |
| 8  | -3  | 2.92E-07        | 1.92E-08         | -3.67E-08        | -1.72E-08        |
| 8  | -2  | -1.05E-05       | 8.98E-08         | -4.76E-09        | -9.68E-08        |
| 8  | -1  | -1.41E-06       | 3.88E-07         | 2.46E-08         | -8.50E-08        |
| 8  | 0   | 6.62E-07        | 6.93E-08         | -3.92E-08        | -8.99E-08        |
| 8  | 1   | 7.32E-08        | 4.47E-07         | 1.23E-07         | -1.90E-08        |
| 8  | 2   | -1.80E-05       | 1.18E-07         | -1.28E-08        | 2.64E-08         |
| 8  | 3   | -4.80E-07       | -4.46E-09        | -4.86E-09        | -9.17E-09        |
| 8  | 4   | -2.24E-06       | 7.66E-08         | 8.75E-08         | 2.45E-09         |
| 8  | 5   | -2.03E-05       | -1.02E-05        | -1.25E-06        | 1.14E-06         |
| 8  | 6   | <b>2.74E-05</b> | <b>-1.75E-05</b> | <b>-1.31E-05</b> | <b>-1.22E-05</b> |
| 8  | 7   | 1.56E-06        | -1.54E-07        | -1.66E-07        | -6.11E-08        |
| 8  | 8   | -1.31E-06       | -1.67E-08        | 1.31E-08         | -1.44E-07        |
| 10 | -10 | -2.88E-08       | -8.90E-10        | 1.24E-09         | -4.01E-09        |
| 10 | -9  | 3.82E-09        | -5.96E-10        | -4.22E-10        | 2.24E-10         |
| 10 | -8  | <b>4.06E-07</b> | 8.84E-09         | -1.14E-09        | -6.12E-10        |
| 10 | -7  | 4.24E-08        | 4.78E-08         | -9.39E-09        | -1.50E-08        |
| 10 | -6  | -2.38E-07       | 9.97E-08         | -7.24E-08        | 2.55E-08         |
| 10 | -5  | -7.74E-08       | -1.24E-09        | -1.72E-09        | 1.45E-10         |
| 10 | -4  | -5.98E-08       | 1.83E-10         | -4.60E-10        | -1.69E-09        |
| 10 | -3  | 8.75E-08        | 2.33E-10         | 3.59E-10         | 1.23E-10         |
| 10 | -2  | 7.74E-08        | -8.83E-10        | 7.75E-11         | 2.05E-10         |
| 10 | -1  | -5.60E-09       | -2.37E-09        | -2.28E-10        | 1.20E-09         |
| 10 | 0   | -1.96E-08       | -4.54E-09        | -1.87E-09        | -1.42E-10        |
| 10 | 1   | 9.08E-10        | -2.45E-09        | -1.31E-09        | 2.55E-10         |
| 10 | 2   | 1.31E-07        | -9.04E-10        | -1.30E-11        | -7.06E-11        |
| 10 | 3   | -4.51E-08       | 2.51E-10         | 3.33E-11         | -1.82E-11        |
| 10 | 4   | 1.02E-07        | -4.41E-10        | -1.51E-09        | -8.30E-11        |
| 10 | 5   | 5.84E-08        | 1.75E-08         | 1.07E-09         | -1.20E-10        |
| 10 | 6   | -2.64E-07       | <b>1.35E-07</b>  | <b>7.66E-08</b>  | <b>4.40E-08</b>  |
| 10 | 7   | -8.50E-08       | 9.39E-09         | 1.39E-08         | 5.04E-09         |
| 10 | 8   | 1.28E-07        | 5.18E-10         | -2.46E-10        | 1.18E-09         |
| 10 | 9   | -4.98E-08       | -1.88E-10        | -1.12E-09        | 4.77E-10         |
| 10 | 10  | -6.18E-09       | -2.88E-09        | -2.52E-09        | 1.70E-09         |

$$\hat{H}_{CF} = \sum_{k=-q}^q B_k^q O_k^q$$

The CF parameters were computed using the following equation, and here  $B_k^q$  and  $O_k^q$  are the crystal field parameters and Steven's operator, respectively.

| k | q | $B_k^q$  |          |          |
|---|---|----------|----------|----------|
|   |   | $3_{Cl}$ | $4_{Cl}$ | $5_{Cl}$ |

## SUPPORTING INFORMATION

|    |     |                  |                  |                  |
|----|-----|------------------|------------------|------------------|
| 2  | -2  | -7.88E-02        | -3.05E-01        | 7.11E-01         |
| 2  | -1  | 6.64E-02         | 3.04E+00         | -8.74E-02        |
| 2  | 0   | <b>-1.69E+01</b> | <b>-1.52E+01</b> | <b>-1.61E+01</b> |
| 2  | 1   | -1.05E+00        | -6.62E-02        | -2.86E+00        |
| 2  | 2   | -1.34E-01        | -6.05E+00        | 4.39E+00         |
| 4  | -4  | -6.18E-04        | -2.04E-03        | -1.40E-03        |
| 4  | -3  | 6.29E-04         | -1.40E-02        | -6.26E-04        |
| 4  | -2  | -4.86E-04        | 3.64E-04         | -4.83E-03        |
| 4  | -1  | -8.09E-04        | <b>-5.79E-02</b> | 1.73E-03         |
| 4  | 0   | <b>-5.90E-02</b> | -4.93E-02        | <b>-5.56E-02</b> |
| 4  | 1   | 1.65E-02         | 1.49E-03         | 5.60E-02         |
| 4  | 2   | -4.44E-03        | 4.42E-02         | -3.06E-02        |
| 4  | 3   | 5.65E-04         | -3.89E-04        | -1.57E-02        |
| 4  | 4   | -8.58E-04        | -2.71E-02        | -1.24E-02        |
| 6  | -6  | 4.33E-03         | 8.29E-04         | -2.75E-03        |
| 6  | -5  | 1.18E-03         | <b>9.31E-03</b>  | -3.20E-03        |
| 6  | -4  | -6.46E-07        | -8.61E-05        | -1.21E-04        |
| 6  | -3  | -1.34E-06        | -5.17E-04        | -8.42E-05        |
| 6  | -2  | 4.05E-05         | 1.25E-05         | 1.13E-04         |
| 6  | -1  | -2.53E-05        | 8.90E-05         | -1.22E-05        |
| 6  | 0   | 4.76E-04         | 3.44E-04         | 4.45E-04         |
| 6  | 1   | 1.68E-04         | -2.18E-05        | -2.17E-04        |
| 6  | 2   | 1.46E-04         | -4.16E-04        | 5.08E-04         |
| 6  | 3   | -4.88E-06        | 4.50E-05         | -3.71E-04        |
| 6  | 4   | -3.47E-05        | -8.62E-04        | -3.79E-04        |
| 6  | 5   | -1.07E-03        | -9.42E-04        | <b>-7.99E-03</b> |
| 6  | 6   | <b>-3.46E-03</b> | 7.23E-03         | -6.33E-03        |
| 8  | -8  | 1.29E-07         | 1.37E-06         | 3.07E-06         |
| 8  | -7  | 5.46E-07         | 1.10E-05         | 3.65E-06         |
| 8  | -6  | 1.31E-05         | 2.10E-06         | -7.85E-06        |
| 8  | -5  | 1.00E-05         | 6.83E-05         | -2.56E-05        |
| 8  | -4  | 1.23E-08         | -5.79E-07        | -9.53E-07        |
| 8  | -3  | 5.25E-08         | -4.81E-06        | -7.02E-07        |
| 8  | -2  | 2.33E-07         | 1.55E-07         | 6.78E-08         |
| 8  | -1  | -5.81E-08        | -8.79E-07        | 7.86E-09         |
| 8  | 0   | 1.30E-07         | 7.08E-08         | 1.26E-07         |
| 8  | 1   | 6.57E-07         | 4.01E-09         | 8.61E-07         |
| 8  | 2   | 4.72E-07         | 2.71E-06         | -9.51E-07        |
| 8  | 3   | 7.55E-08         | 4.06E-07         | -3.84E-06        |
| 8  | 4   | -2.71E-07        | -6.34E-06        | -3.15E-06        |
| 8  | 5   | -9.07E-06        | -6.85E-06        | -6.36E-05        |
| 8  | 6   | -1.05E-05        | 1.86E-05         | -1.81E-05        |
| 8  | 7   | -3.97E-07        | -1.75E-06        | 5.65E-06         |
| 8  | 8   | -2.37E-07        | 7.94E-06         | 4.73E-06         |
| 10 | -10 | -9.22E-10        | -2.10E-08        | 3.61E-08         |
| 10 | -9  | 6.37E-10         | <b>-2.30E-07</b> | 1.78E-08         |
| 10 | -8  | -1.27E-08        | 2.10E-08         | 7.84E-08         |
| 10 | -7  | -1.85E-08        | 8.86E-08         | 1.46E-08         |
| 10 | -6  | <b>-1.03E-07</b> | -1.48E-08        | 6.13E-08         |
| 10 | -5  | -2.14E-08        | -1.40E-07        | 6.20E-08         |
| 10 | -4  | -4.12E-09        | 1.32E-08         | 2.22E-08         |
| 10 | -3  | -2.63E-10        | 1.29E-07         | 2.54E-08         |
| 10 | -2  | -9.97E-10        | -1.96E-10        | -3.76E-09        |
| 10 | -1  | 3.28E-10         | -7.41E-09        | 7.97E-11         |
| 10 | 0   | -4.43E-09        | -2.63E-09        | -3.87E-09        |
| 10 | 1   | -1.41E-11        | 8.01E-10         | 1.23E-08         |
| 10 | 2   | -3.95E-09        | 1.48E-08         | -1.91E-08        |
| 10 | 3   | 2.77E-09         | -1.06E-08        | 1.13E-07         |
| 10 | 4   | 6.99E-09         | 1.22E-07         | 7.62E-08         |
| 10 | 5   | 1.88E-08         | 1.33E-08         | <b>1.55E-07</b>  |

## SUPPORTING INFORMATION

|    |    |           |           |          |
|----|----|-----------|-----------|----------|
| 10 | 6  | 8.23E-08  | -1.33E-07 | 1.41E-07 |
| 10 | 7  | 1.09E-08  | -1.07E-09 | 3.24E-09 |
| 10 | 8  | 1.62E-08  | 1.74E-07  | 1.18E-07 |
| 10 | 9  | -2.64E-09 | 3.29E-08  | 7.11E-08 |
| 10 | 10 | 2.94E-09  | -1.20E-07 | 6.05E-08 |

**Table S20:** Selected structural parameters of reported Dy(III) based SMMs

| Complex                                                                                                         | Dy-O(18C6)           | [Ref]                                                      |
|-----------------------------------------------------------------------------------------------------------------|----------------------|------------------------------------------------------------|
| [Dy(H <sub>2</sub> O) <sub>3</sub> (18C6)] <sup>3+</sup>                                                        | 2.510                | <i>Inorg. Chem.</i> 2018, <b>57</b> , 13225–13234          |
| [Dy(18C6)(Cl)(O <sup>t</sup> Bu)] <sup>+</sup>                                                                  | 2.550                | <i>Inorg. Chem.</i> 2022, <b>61</b> , 1, 227–235           |
| [Dy(18-C-6)I <sub>2</sub> ] <sup>+</sup>                                                                        | 2.452                | <i>Adv. Sci.</i> 2024, 2308548                             |
| [Dy(18-C-6)(O <sup>t</sup> Bu) <sub>2</sub> ] <sup>+</sup>                                                      | 2.613                | <i>Adv. Sci.</i> 2024, 2308548                             |
| [Dy(18-C-6)(AdO) <sub>2</sub> ] <sup>+</sup>                                                                    | 2.636                | <i>Adv. Sci.</i> 2024, 2308548                             |
|                                                                                                                 | Dy-X                 |                                                            |
| [Dy(18-C-6)I <sub>2</sub> ] <sup>+</sup>                                                                        | 3.013 (X = I)        | <i>Adv. Sci.</i> 2024, 2308548                             |
| [Dy(O <sup>t</sup> Bu)Cl(18-C-6)] <sup>+</sup>                                                                  | 2.608 (X = Cl)       | <i>Inorg. Chem.</i> 2022, <b>61</b> , 1, 227–235           |
| [DyLF] <sup>+</sup>                                                                                             | 2.12 (X = F)         | <i>Inorg. Chem.</i> 2022, <b>61</b> , 9906–9917            |
|                                                                                                                 | Dy-S                 |                                                            |
| [Dy <sub>4</sub> {N(SiMe <sub>3</sub> ) <sub>2</sub> } <sub>4</sub> (μ-SEt) <sub>8</sub> (μ <sub>4</sub> -SEt)] | 2.9406/2.8226        | <i>Organometallics</i> 2013, 32, <b>5</b> , 1224–1229      |
| [Dy((-)pbipy)(ptdc) <sub>3</sub> ]                                                                              | 2.775(2)–2.876(2)    | <i>Inorganica Chim. Acta</i> , 2018, <b>473</b> , 145–151. |
| [(diethyl-dtc) <sub>3</sub> Dy(phen)]                                                                           | 2.9027/2.8066/2.8740 | <i>Dalton Trans.</i> , 2016, <b>45</b> , 8149–8153         |
| [Dy <sup>III</sup> L <sup>ON3</sup> (C <sub>5</sub> H <sub>10</sub> NS <sub>2</sub> ) <sub>2</sub> ]            | 2.8133(5)–2.9647(6)  | <i>Chem. Commun.</i> , 2020, <b>56</b> , 1533–1536         |
| [Dy(tba) <sub>3</sub> phen]                                                                                     | 2.80–2.84            | <i>J. Mater. Chem. C</i> , 2022, <b>10</b> , 13946–13953   |
| [(dtc) <sub>3</sub> Dy(dmbipy)]                                                                                 | 2.833                | <i>Inorg. Chem. Commun.</i> , 2018, <b>95</b> , 82–85      |
| <i>dtc</i> : dithiocarbamate; <i>tba</i> : thiobenzoate; <i>ptdc</i> : pyrrolidine-dithiocarbamate              |                      |                                                            |

## DFT Optimised Coordinates

| <b>I<sub>F</sub></b> |                 |                 |                 |
|----------------------|-----------------|-----------------|-----------------|
| Dy                   | 0.000000000000  | 0.000000000000  | 0.000000000000  |
| F                    | 0.026960000000  | 0.442548000000  | 1.978647000000  |
| F                    | -0.623207000000 | 0.410134000000  | -1.888786000000 |
| O                    | -2.320288000000 | -1.273184000000 | 0.304311000000  |
| O                    | -2.311032000000 | 1.406187000000  | 0.396237000000  |
| O                    | 0.000000000000  | 2.725596000000  | 0.000000000000  |
| O                    | 2.238550000000  | 1.331750000000  | -0.476454000000 |
| C                    | -3.526717000000 | -0.589213000000 | 0.236795000000  |
| C                    | -3.514948000000 | 0.753885000000  | 0.276803000000  |
| C                    | -2.309282000000 | 2.784343000000  | 0.429913000000  |
| C                    | -1.155272000000 | 3.444252000000  | 0.232597000000  |
| C                    | 1.088028000000  | 3.384946000000  | -0.520339000000 |
| C                    | 2.215027000000  | 2.693285000000  | -0.757425000000 |
| H                    | -4.442289000000 | -1.183133000000 | 0.130604000000  |
| H                    | -4.428620000000 | 1.357663000000  | 0.202925000000  |
| H                    | -3.258305000000 | 3.293156000000  | 0.642666000000  |

## SUPPORTING INFORMATION

---

|   |                 |                 |                 |
|---|-----------------|-----------------|-----------------|
| H | -1.078019000000 | 4.538393000000  | 0.270394000000  |
| H | 0.991851000000  | 4.456018000000  | -0.740210000000 |
| H | 3.121123000000  | 3.138453000000  | -1.184917000000 |
| O | -0.022303000000 | -2.621664000000 | 0.221959000000  |
| O | 2.275259000000  | -1.313738000000 | -0.185205000000 |
| C | -2.362507000000 | -2.647637000000 | 0.415895000000  |
| C | -1.208717000000 | -3.331905000000 | 0.378342000000  |
| C | 1.152861000000  | -3.351517000000 | 0.125182000000  |
| C | 2.305462000000  | -2.696179000000 | -0.078367000000 |
| C | 3.473665000000  | -0.658447000000 | -0.442850000000 |
| C | 3.448858000000  | 0.674543000000  | -0.593829000000 |
| H | -3.341334000000 | -3.126753000000 | 0.541844000000  |
| H | -1.141876000000 | -4.422516000000 | 0.465280000000  |
| H | 1.087318000000  | -4.441854000000 | 0.221655000000  |
| H | 3.277939000000  | -3.195333000000 | -0.164894000000 |
| H | 4.384585000000  | -1.264729000000 | -0.508672000000 |
| H | 4.344346000000  | 1.275270000000  | -0.794492000000 |

---

### I<sub>Cl</sub>

---

|    |                 |                 |                 |
|----|-----------------|-----------------|-----------------|
| Dy | 0.000000000000  | 0.000000000000  | 0.000000000000  |
| Cl | 0.000000000000  | 0.000000000000  | 2.503916000000  |
| Cl | 0.573355000000  | 0.462443000000  | -2.400143000000 |
| O  | -1.316182000000 | 2.303277000000  | -0.126009000000 |
| O  | 1.284720000000  | 2.307754000000  | 0.424273000000  |
| O  | 2.641387000000  | 0.021623000000  | 0.355488000000  |
| O  | 1.376773000000  | -2.231329000000 | -0.252034000000 |
| C  | -0.625643000000 | 3.500674000000  | -0.205022000000 |
| C  | 0.687568000000  | 3.501052000000  | 0.076111000000  |
| C  | 2.620583000000  | 2.324717000000  | 0.775394000000  |
| C  | 3.306668000000  | 1.171275000000  | 0.739940000000  |
| C  | 3.392155000000  | -1.047227000000 | -0.088173000000 |
| C  | 2.755029000000  | -2.187903000000 | -0.397245000000 |
| H  | -1.182446000000 | 4.394436000000  | -0.510601000000 |
| H  | 1.316059000000  | 4.398294000000  | 0.019241000000  |
| H  | 3.053186000000  | 3.279481000000  | 1.099694000000  |
| H  | 4.360152000000  | 1.079247000000  | 1.032227000000  |
| H  | 4.475420000000  | -0.912026000000 | -0.195626000000 |
| H  | 3.257606000000  | -3.084120000000 | -0.779588000000 |
| O  | -2.605801000000 | -0.000067000000 | -0.051670000000 |
| O  | -1.253671000000 | -2.287896000000 | -0.072129000000 |
| C  | -2.680744000000 | 2.322198000000  | -0.330499000000 |
| C  | -3.341598000000 | 1.155492000000  | -0.284328000000 |
| C  | -3.307626000000 | -1.181820000000 | 0.132387000000  |
| C  | -2.625761000000 | -2.336429000000 | 0.121824000000  |
| C  | -0.593853000000 | -3.480918000000 | -0.334245000000 |
| C  | 0.743415000000  | -3.446631000000 | -0.433838000000 |
| H  | -3.162920000000 | 3.288030000000  | -0.524271000000 |
| H  | -4.421452000000 | 1.052030000000  | -0.441266000000 |
| H  | -4.388045000000 | -1.112691000000 | 0.306346000000  |
| H  | -3.085304000000 | -3.318555000000 | 0.285124000000  |
| H  | -1.199320000000 | -4.385368000000 | -0.464547000000 |
| H  | 1.362975000000  | -4.325254000000 | -0.649634000000 |

---

### I<sub>Br</sub>

---

|    |                 |                |                 |
|----|-----------------|----------------|-----------------|
| Dy | 0.000000000000  | 0.000000000000 | 0.000000000000  |
| Br | 0.000000000000  | 0.000000000000 | 2.667086000000  |
| Br | -0.392585000000 | 0.654086000000 | -2.562578000000 |

---

## SUPPORTING INFORMATION

---

|   |                 |                 |                 |
|---|-----------------|-----------------|-----------------|
| O | -2.463456000000 | -0.978651000000 | -0.125492000000 |
| O | -2.105139000000 | 1.598279000000  | 0.413796000000  |
| O | 0.347711000000  | 2.619695000000  | 0.343676000000  |
| O | 2.400407000000  | 1.048716000000  | -0.252532000000 |
| C | -3.553250000000 | -0.128344000000 | -0.209344000000 |
| C | -3.370296000000 | 1.172802000000  | 0.066005000000  |
| C | -1.936047000000 | 2.926385000000  | 0.755172000000  |
| C | -0.698112000000 | 3.443307000000  | 0.719183000000  |
| C | 1.512506000000  | 3.211166000000  | -0.100317000000 |
| C | 2.552557000000  | 2.418874000000  | -0.403505000000 |
| H | -4.515396000000 | -0.556722000000 | -0.513996000000 |
| H | -4.170372000000 | 1.920653000000  | 0.005215000000  |
| H | -2.821403000000 | 3.490328000000  | 1.074334000000  |
| H | -0.459403000000 | 4.475076000000  | 1.005649000000  |
| H | 1.530824000000  | 4.302132000000  | -0.212468000000 |
| H | 3.511577000000  | 2.787983000000  | -0.785412000000 |
| O | -0.365299000000 | -2.577639000000 | -0.038083000000 |
| O | 2.086925000000  | -1.561042000000 | -0.058517000000 |
| C | -2.673952000000 | -2.328111000000 | -0.323050000000 |
| C | -1.612024000000 | -3.145821000000 | -0.270102000000 |
| C | 0.704617000000  | -3.437560000000 | 0.158833000000  |
| C | 1.943203000000  | -2.924634000000 | 0.148302000000  |
| C | 3.361669000000  | -1.077340000000 | -0.320426000000 |
| C | 3.515576000000  | 0.250588000000  | -0.427360000000 |
| H | -3.697709000000 | -2.670461000000 | -0.516618000000 |
| H | -1.660698000000 | -4.230475000000 | -0.420040000000 |
| H | 0.483032000000  | -4.495594000000 | 0.342502000000  |
| H | 2.850987000000  | -3.514833000000 | 0.321242000000  |
| H | 4.172315000000  | -1.804756000000 | -0.443800000000 |
| H | 4.472702000000  | 0.739992000000  | -0.643424000000 |

---

### I<sub>1</sub>

---

|    |                 |                 |                 |
|----|-----------------|-----------------|-----------------|
| Dy | 0.000000000000  | 0.000000000000  | 0.000000000000  |
| I  | 0.478903000000  | -0.409770000000 | -2.824012000000 |
| I  | 0.000000000000  | 0.000000000000  | 2.898363000000  |
| O  | -1.625616000000 | -2.067731000000 | 0.187932000000  |
| O  | 0.994550000000  | -2.442462000000 | 0.245067000000  |
| O  | 2.632983000000  | -0.362877000000 | 0.163691000000  |
| O  | 1.601436000000  | 2.084548000000  | 0.229819000000  |
| C  | -1.148454000000 | -3.292356000000 | 0.629510000000  |
| C  | 0.179500000000  | -3.479526000000 | 0.658688000000  |
| C  | 2.354860000000  | -2.684573000000 | 0.152843000000  |
| C  | 3.183607000000  | -1.631376000000 | 0.109854000000  |
| C  | 3.471746000000  | 0.693686000000  | 0.462759000000  |
| C  | 2.952490000000  | 1.929454000000  | 0.500712000000  |
| H  | -1.880609000000 | -4.038881000000 | 0.959062000000  |
| H  | 0.656467000000  | -4.398125000000 | 1.021106000000  |
| H  | 2.685391000000  | -3.727834000000 | 0.080252000000  |
| H  | 4.271864000000  | -1.713288000000 | 0.000085000000  |
| H  | 4.525869000000  | 0.473114000000  | 0.669375000000  |
| H  | 3.532599000000  | 2.829212000000  | 0.736260000000  |
| O  | -2.526738000000 | 0.286437000000  | -0.569991000000 |
| O  | -0.931772000000 | 2.381843000000  | -0.402544000000 |
| C  | -2.983234000000 | -1.942946000000 | -0.040271000000 |
| C  | -3.444286000000 | -0.747398000000 | -0.434731000000 |
| C  | -2.982744000000 | 1.491400000000  | -1.082657000000 |

---

## SUPPORTING INFORMATION

---

|   |                 |                 |                 |
|---|-----------------|-----------------|-----------------|
| C | -2.174065000000 | 2.556930000000  | -0.996157000000 |
| C | -0.213726000000 | 3.520553000000  | -0.057351000000 |
| C | 1.075488000000  | 3.362338000000  | 0.274494000000  |
| H | -3.616187000000 | -2.825744000000 | 0.108916000000  |
| H | -4.498128000000 | -0.527751000000 | -0.640619000000 |
| H | -3.968806000000 | 1.503723000000  | -1.561953000000 |
| H | -2.414756000000 | 3.548628000000  | -1.397064000000 |
| H | -0.747114000000 | 4.478054000000  | -0.040887000000 |
| H | 1.731611000000  | 4.180484000000  | 0.594641000000  |

---

### 2<sub>F</sub>

---

|    |                 |                 |                 |
|----|-----------------|-----------------|-----------------|
| Dy | 0.000000000000  | 0.000000000000  | 0.000000000000  |
| F  | 0.445891000000  | -0.149893000000 | 1.971435000000  |
| F  | 0.555416000000  | -0.098908000000 | -1.955186000000 |
| S  | -3.108205000000 | -0.478713000000 | 0.212800000000  |
| S  | -1.917573000000 | 2.473774000000  | 0.284043000000  |
| S  | 1.220230000000  | 2.915830000000  | 0.236915000000  |
| S  | 3.224904000000  | 0.444519000000  | 0.169835000000  |
| C  | -3.830233000000 | 0.824277000000  | -0.721473000000 |
| C  | -3.324972000000 | 2.076154000000  | -0.690891000000 |
| C  | -1.195727000000 | 3.783116000000  | -0.642420000000 |
| C  | 0.142387000000  | 3.965148000000  | -0.664623000000 |
| C  | 2.658254000000  | 2.926169000000  | -0.774553000000 |
| C  | 3.504108000000  | 1.873269000000  | -0.805550000000 |
| H  | -4.755413000000 | 0.589985000000  | -1.270851000000 |
| H  | -3.820078000000 | 2.908496000000  | -1.215146000000 |
| H  | -1.887261000000 | 4.487171000000  | -1.130716000000 |
| H  | 0.593364000000  | 4.824219000000  | -1.186000000000 |
| H  | 2.869674000000  | 3.854562000000  | -1.327012000000 |
| H  | 4.429395000000  | 1.907660000000  | -1.401806000000 |
| S  | -1.109986000000 | -2.942577000000 | 0.070006000000  |
| S  | 2.044103000000  | -2.513002000000 | 0.079753000000  |
| C  | -3.454302000000 | -1.878174000000 | -0.794699000000 |
| C  | -2.600362000000 | -2.922457000000 | -0.856372000000 |
| C  | -0.051437000000 | -3.879474000000 | -0.976857000000 |
| C  | 1.286119000000  | -3.690980000000 | -0.973213000000 |
| C  | 3.449668000000  | -2.056080000000 | -0.866875000000 |
| C  | 3.949922000000  | -0.802342000000 | -0.828520000000 |
| H  | -4.430672000000 | -1.896269000000 | -1.303618000000 |
| H  | -2.847654000000 | -3.830894000000 | -1.428045000000 |
| H  | -0.525455000000 | -4.667967000000 | -1.581274000000 |
| H  | 1.947790000000  | -4.317233000000 | -1.592095000000 |
| H  | 3.947359000000  | -2.854585000000 | -1.439365000000 |
| H  | 4.871101000000  | -0.539041000000 | -1.371910000000 |

---

### 2<sub>Cl</sub>

---

|    |                 |                 |                 |
|----|-----------------|-----------------|-----------------|
| Dy | 0.000000000000  | 0.000000000000  | 0.000000000000  |
| Cl | 0.000000000000  | 0.000000000000  | 2.536021000000  |
| Cl | 0.255748000000  | -0.054183000000 | -2.532456000000 |
| S  | -3.167246000000 | 0.144052000000  | 0.074935000000  |
| S  | -1.467256000000 | 2.807279000000  | 0.089653000000  |
| S  | 1.692814000000  | 2.670466000000  | 0.152148000000  |
| S  | 3.153421000000  | -0.140801000000 | 0.201528000000  |
| C  | -3.631760000000 | 1.516964000000  | -0.908199000000 |
| C  | -2.903853000000 | 2.657383000000  | -0.901363000000 |
| C  | -0.493558000000 | 3.920174000000  | -0.848719000000 |
| C  | 0.857688000000  | 3.861062000000  | -0.822806000000 |

---



## SUPPORTING INFORMATION

---

|   |                 |                 |                 |
|---|-----------------|-----------------|-----------------|
| C | 3.137277000000  | 2.380912000000  | -0.793361000000 |
| C | 3.760260000000  | 1.180034000000  | -0.773054000000 |
| H | -4.564244000000 | 1.433921000000  | -1.487746000000 |
| H | -3.218984000000 | 3.542507000000  | -1.475500000000 |
| H | -1.024314000000 | 4.699615000000  | -1.417201000000 |
| H | 1.473849000000  | 4.590374000000  | -1.371431000000 |
| H | 3.542770000000  | 3.226973000000  | -1.369612000000 |
| H | 4.692189000000  | 1.009581000000  | -1.334128000000 |
| S | -1.715280000000 | -2.659326000000 | 0.150181000000  |
| S | 1.442128000000  | -2.808755000000 | 0.212797000000  |
| C | -3.759994000000 | -1.205080000000 | -0.871654000000 |
| C | -3.138133000000 | -2.406309000000 | -0.839049000000 |
| C | -0.849342000000 | -3.878460000000 | -0.760786000000 |
| C | 0.501902000000  | -3.941466000000 | -0.734781000000 |
| C | 2.904827000000  | -2.671721000000 | -0.738689000000 |
| C | 3.634716000000  | -1.532427000000 | -0.744234000000 |
| H | -4.686040000000 | -1.051565000000 | -1.447138000000 |
| H | -3.535792000000 | -3.274302000000 | -1.387534000000 |
| H | -1.448789000000 | -4.619962000000 | -1.311441000000 |
| H | 1.048827000000  | -4.736257000000 | -1.265561000000 |
| H | 3.229953000000  | -3.562585000000 | -1.298112000000 |
| H | 4.576512000000  | -1.459502000000 | -1.309923000000 |

---

### 2<sub>Br</sub>

---

|    |                 |                 |                 |
|----|-----------------|-----------------|-----------------|
| Dy | 0.000000000000  | 0.000000000000  | 0.000000000000  |
| Br | 0.000000000000  | 0.000000000000  | 2.691825000000  |
| Br | 0.007277000000  | -0.001008000000 | -2.699068000000 |
| S  | -3.162896000000 | 0.078496000000  | 0.114130000000  |
| S  | -1.514617000000 | 2.773313000000  | 0.120713000000  |
| S  | 1.648426000000  | 2.697386000000  | 0.088545000000  |
| S  | 3.156164000000  | -0.081712000000 | 0.084082000000  |
| C  | -3.677141000000 | 1.452726000000  | -0.839949000000 |
| C  | -2.972454000000 | 2.607055000000  | -0.835232000000 |
| C  | -0.590557000000 | 3.911840000000  | -0.836260000000 |
| C  | 0.761028000000  | 3.878163000000  | -0.852068000000 |
| C  | 3.063972000000  | 2.437451000000  | -0.908908000000 |
| C  | 3.708682000000  | 1.248764000000  | -0.910963000000 |
| H  | -4.621003000000 | 1.357139000000  | -1.398635000000 |
| H  | -3.318020000000 | 3.493464000000  | -1.389391000000 |
| H  | -1.152475000000 | 4.686364000000  | -1.380939000000 |
| H  | 1.347787000000  | 4.623930000000  | -1.410581000000 |
| H  | 3.433820000000  | 3.293116000000  | -1.494661000000 |
| H  | 4.626510000000  | 1.094120000000  | -1.498956000000 |
| S  | -1.656590000000 | -2.691451000000 | 0.139990000000  |
| S  | 1.503007000000  | -2.778611000000 | 0.138516000000  |
| C  | -3.738862000000 | -1.267741000000 | -0.844726000000 |
| C  | -3.093266000000 | -2.456336000000 | -0.832678000000 |
| C  | -0.785765000000 | -3.892824000000 | -0.789387000000 |
| C  | 0.565942000000  | -3.930170000000 | -0.790222000000 |
| C  | 2.945323000000  | -2.619922000000 | -0.841582000000 |
| C  | 3.651052000000  | -1.466653000000 | -0.865908000000 |
| H  | -4.671337000000 | -1.125359000000 | -1.412425000000 |
| H  | -3.477402000000 | -3.324887000000 | -1.389600000000 |
| H  | -1.382240000000 | -4.646701000000 | -1.326198000000 |
| H  | 1.118793000000  | -4.715919000000 | -1.328137000000 |
| H  | 3.281054000000  | -3.510388000000 | -1.395319000000 |

---

## SUPPORTING INFORMATION

|                       |                 |                 |                 |
|-----------------------|-----------------|-----------------|-----------------|
| H                     | 4.585883000000  | -1.377844000000 | -1.440775000000 |
| <hr/>                 |                 |                 |                 |
| <b>2<sub>I</sub></b>  |                 |                 |                 |
| Dy                    | 0.000000000000  | 0.000000000000  | 0.000000000000  |
| I                     | 0.000000000000  | 0.000000000000  | 2.913244000000  |
| I                     | 0.000101000000  | -0.001214000000 | -2.911116000000 |
| S                     | -3.160825000000 | -0.055603000000 | 0.084572000000  |
| S                     | -1.619247000000 | 2.694792000000  | 0.122797000000  |
| S                     | 1.539216000000  | 2.746770000000  | 0.127845000000  |
| S                     | 3.154182000000  | 0.043962000000  | 0.112474000000  |
| C                     | -3.720777000000 | 1.304285000000  | -0.866889000000 |
| C                     | -3.061441000000 | 2.483512000000  | -0.849337000000 |
| C                     | -0.733284000000 | 3.881905000000  | -0.812471000000 |
| C                     | 0.617616000000  | 3.903430000000  | -0.811530000000 |
| C                     | 2.984374000000  | 2.568819000000  | -0.846915000000 |
| C                     | 3.676855000000  | 1.408637000000  | -0.854253000000 |
| H                     | -4.658617000000 | 1.174557000000  | -1.428684000000 |
| H                     | -3.435820000000 | 3.362849000000  | -1.395848000000 |
| H                     | -1.322307000000 | 4.640336000000  | -1.350941000000 |
| H                     | 1.182623000000  | 4.680641000000  | -1.349035000000 |
| H                     | 3.331008000000  | 3.452690000000  | -1.404231000000 |
| H                     | 4.616040000000  | 1.299188000000  | -1.418113000000 |
| S                     | -1.546639000000 | -2.754422000000 | 0.092191000000  |
| S                     | 1.608587000000  | -2.708537000000 | 0.115881000000  |
| C                     | -3.680204000000 | -1.413611000000 | -0.892409000000 |
| C                     | -2.986999000000 | -2.573370000000 | -0.888272000000 |
| C                     | -0.620466000000 | -3.908162000000 | -0.845522000000 |
| C                     | 0.730452000000  | -3.889063000000 | -0.834979000000 |
| C                     | 3.057275000000  | -2.487753000000 | -0.843909000000 |
| C                     | 3.717850000000  | -1.309086000000 | -0.847201000000 |
| H                     | -4.617388000000 | -1.300564000000 | -1.458784000000 |
| H                     | -3.330080000000 | -3.455163000000 | -1.451016000000 |
| H                     | -1.183168000000 | -4.681119000000 | -1.391403000000 |
| H                     | 1.322595000000  | -4.646319000000 | -1.371742000000 |
| H                     | 3.434253000000  | -3.361931000000 | -1.396883000000 |
| H                     | 4.659254000000  | -1.176484000000 | -1.402392000000 |
| <hr/>                 |                 |                 |                 |
| <b>3<sub>CI</sub></b> |                 |                 |                 |
| Dy                    | 0.000000000000  | 0.000000000000  | 0.000000000000  |
| Cl                    | 0.000000000000  | 0.000000000000  | 2.544938000000  |
| Cl                    | -0.456727000000 | 0.128008000000  | -2.495154000000 |
| Se                    | -3.326147000000 | -0.105112000000 | 0.433413000000  |
| Se                    | -1.750915000000 | 2.825753000000  | 0.385092000000  |
| Se                    | 1.567185000000  | 2.932135000000  | 0.192987000000  |
| Se                    | 3.313157000000  | 0.102861000000  | 0.071358000000  |
| C                     | -3.935339000000 | 1.326733000000  | -0.656815000000 |
| C                     | -3.297071000000 | 2.513961000000  | -0.675809000000 |
| C                     | -0.867951000000 | 4.031686000000  | -0.789529000000 |
| C                     | 0.476742000000  | 4.074136000000  | -0.869073000000 |
| C                     | 2.995370000000  | 2.703486000000  | -1.044171000000 |
| C                     | 3.702658000000  | 1.557514000000  | -1.094199000000 |
| H                     | -4.848661000000 | 1.145611000000  | -1.244907000000 |
| H                     | -3.659308000000 | 3.361084000000  | -1.279292000000 |
| H                     | -1.508886000000 | 4.712617000000  | -1.371362000000 |
| H                     | 1.002780000000  | 4.793832000000  | -1.515894000000 |
| H                     | 3.238444000000  | 3.568345000000  | -1.681409000000 |
| H                     | 4.559909000000  | 1.427178000000  | -1.773303000000 |

## SUPPORTING INFORMATION

---

|    |                 |                 |                 |
|----|-----------------|-----------------|-----------------|
| Se | -1.569922000000 | -2.922757000000 | 0.317363000000  |
| Se | 1.746770000000  | -2.832496000000 | 0.159832000000  |
| C  | -3.834321000000 | -1.538113000000 | -0.706399000000 |
| C  | -3.122134000000 | -2.681823000000 | -0.754071000000 |
| C  | -0.607360000000 | -4.067966000000 | -0.857662000000 |
| C  | 0.738327000000  | -4.031650000000 | -0.922116000000 |
| C  | 3.172361000000  | -2.506817000000 | -1.059651000000 |
| C  | 3.805878000000  | -1.318078000000 | -1.096578000000 |
| H  | -4.751747000000 | -1.396963000000 | -1.299024000000 |
| H  | -3.423622000000 | -3.532851000000 | -1.384718000000 |
| H  | -1.201806000000 | -4.786370000000 | -1.443857000000 |
| H  | 1.313318000000  | -4.719190000000 | -1.562299000000 |
| H  | 3.479377000000  | -3.352543000000 | -1.695069000000 |
| H  | 4.662288000000  | -1.131476000000 | -1.763580000000 |

---

### 4Cl

---

|    |                 |                 |                 |
|----|-----------------|-----------------|-----------------|
| Dy | 0.000000000000  | 0.000000000000  | 0.000000000000  |
| Cl | 0.005213000000  | -1.183490000000 | -2.269224000000 |
| Cl | 0.000000000000  | 0.000000000000  | 2.544531000000  |
| S  | -2.910708000000 | -0.117792000000 | -0.579749000000 |
| O  | -1.334851000000 | -2.422810000000 | 0.535222000000  |
| O  | 1.446742000000  | -2.357285000000 | 0.516273000000  |
| S  | 2.908933000000  | 0.029392000000  | -0.602000000000 |
| C  | -3.480535000000 | -1.420583000000 | 0.447791000000  |
| C  | -2.673565000000 | -2.432677000000 | 0.830735000000  |
| C  | -0.589195000000 | -3.516411000000 | 0.903393000000  |
| C  | 0.757760000000  | -3.485093000000 | 0.893401000000  |
| C  | 2.790284000000  | -2.310500000000 | 0.786542000000  |
| C  | 3.546745000000  | -1.261437000000 | 0.400994000000  |
| H  | -4.543197000000 | -1.434320000000 | 0.729301000000  |
| H  | -3.038190000000 | -3.295726000000 | 1.408260000000  |
| H  | -1.132830000000 | -4.424166000000 | 1.197090000000  |
| H  | 1.347841000000  | -4.366317000000 | 1.178015000000  |
| H  | 3.202841000000  | -3.163191000000 | 1.346995000000  |
| H  | 4.613908000000  | -1.234563000000 | 0.664203000000  |
| O  | -1.445238000000 | 2.386516000000  | 0.079579000000  |
| O  | 1.322289000000  | 2.449577000000  | 0.085908000000  |
| C  | -3.553719000000 | 1.299471000000  | 0.237191000000  |
| C  | -2.785255000000 | 2.389113000000  | 0.425531000000  |
| C  | -0.760004000000 | 3.578030000000  | 0.239901000000  |
| C  | 0.582619000000  | 3.608612000000  | 0.243440000000  |
| C  | 2.657952000000  | 2.511135000000  | 0.443553000000  |
| C  | 3.478263000000  | 1.462210000000  | 0.243334000000  |
| H  | -4.610949000000 | 1.312034000000  | 0.538284000000  |
| H  | -3.161909000000 | 3.321122000000  | 0.872145000000  |
| H  | -1.357597000000 | 4.493549000000  | 0.338224000000  |
| H  | 1.137283000000  | 4.550399000000  | 0.344793000000  |
| H  | 2.985536000000  | 3.451739000000  | 0.910277000000  |
| H  | 4.530941000000  | 1.518666000000  | 0.555067000000  |

---

### 5Cl

---

|    |                 |                 |                 |
|----|-----------------|-----------------|-----------------|
| Dy | 0.000000000000  | 0.000000000000  | 0.000000000000  |
| Cl | 0.000000000000  | 0.000000000000  | 2.522020000000  |
| Cl | -0.104449000000 | 0.997859000000  | -2.292262000000 |
| Se | -3.012856000000 | -0.505282000000 | 0.587314000000  |
| O  | -1.567285000000 | 2.219207000000  | 0.528015000000  |
| O  | 1.170935000000  | 2.450445000000  | 0.502726000000  |

---

## SUPPORTING INFORMATION

---

|    |                 |                 |                 |
|----|-----------------|-----------------|-----------------|
| Se | 3.042235000000  | 0.022910000000  | 0.568517000000  |
| C  | -3.643281000000 | 1.199902000000  | 0.001296000000  |
| C  | -2.877664000000 | 2.299218000000  | 0.100809000000  |
| C  | -0.958528000000 | 3.405811000000  | 0.893262000000  |
| C  | 0.378968000000  | 3.520105000000  | 0.880032000000  |
| C  | 2.430196000000  | 2.745270000000  | 0.020247000000  |
| C  | 3.366562000000  | 1.787433000000  | -0.085929000000 |
| H  | -4.674096000000 | 1.267561000000  | -0.371822000000 |
| H  | -3.230774000000 | 3.306257000000  | -0.170262000000 |
| H  | -1.610156000000 | 4.220773000000  | 1.234384000000  |
| H  | 0.891228000000  | 4.433362000000  | 1.209624000000  |
| H  | 2.593344000000  | 3.789359000000  | -0.288710000000 |
| H  | 4.356866000000  | 2.009030000000  | -0.505797000000 |
| O  | -1.176225000000 | -2.279218000000 | -1.068625000000 |
| O  | 1.553587000000  | -2.076969000000 | -1.057598000000 |
| C  | -3.413347000000 | -1.478679000000 | -1.008512000000 |
| C  | -2.472920000000 | -2.249014000000 | -1.574393000000 |
| C  | -0.394650000000 | -3.349012000000 | -1.480345000000 |
| C  | 0.942545000000  | -3.250833000000 | -1.474064000000 |
| C  | 2.842668000000  | -1.863230000000 | -1.529967000000 |
| C  | 3.634619000000  | -0.933161000000 | -0.976127000000 |
| H  | -4.428608000000 | -1.429449000000 | -1.424658000000 |
| H  | -2.642381000000 | -2.869355000000 | -2.467551000000 |
| H  | -0.914948000000 | -4.276280000000 | -1.753129000000 |
| H  | 1.595675000000  | -4.092003000000 | -1.740083000000 |
| H  | 3.137694000000  | -2.485253000000 | -2.388825000000 |
| H  | 4.643837000000  | -0.744810000000 | -1.366375000000 |

---

### 2<sub>OTBu</sub>

---

|    |                 |                 |                 |
|----|-----------------|-----------------|-----------------|
| Dy | 0.000000000000  | 0.000000000000  | 0.000000000000  |
| S  | -2.659881000000 | 1.440373000000  | 0.367162000000  |
| S  | -0.080433000000 | 3.127428000000  | -0.036811000000 |
| S  | 2.723687000000  | 1.793026000000  | -0.114926000000 |
| S  | 2.908378000000  | -1.343414000000 | -0.084228000000 |
| C  | -2.670442000000 | 2.830312000000  | -0.711534000000 |
| C  | -1.548590000000 | 3.555266000000  | -0.892109000000 |
| C  | 1.155320000000  | 3.737098000000  | -1.125076000000 |
| C  | 2.374979000000  | 3.161416000000  | -1.154231000000 |
| C  | 3.949050000000  | 0.959212000000  | -1.051652000000 |
| C  | 4.026225000000  | -0.387188000000 | -1.039671000000 |
| H  | -3.637219000000 | 3.114006000000  | -1.153955000000 |
| H  | -1.536123000000 | 4.468521000000  | -1.506371000000 |
| H  | 0.916417000000  | 4.644654000000  | -1.699842000000 |
| H  | 3.195155000000  | 3.564546000000  | -1.768015000000 |
| H  | 4.690931000000  | 1.577668000000  | -1.580733000000 |
| H  | 4.834446000000  | -0.928500000000 | -1.555591000000 |
| S  | -2.466803000000 | -1.700897000000 | 0.452008000000  |
| S  | 0.322793000000  | -3.053822000000 | 0.089381000000  |
| C  | -3.909235000000 | 0.442370000000  | -0.357715000000 |
| C  | -3.827611000000 | -0.902007000000 | -0.321077000000 |
| C  | -2.294491000000 | -3.127414000000 | -0.561891000000 |
| C  | -1.088479000000 | -3.706321000000 | -0.722487000000 |
| C  | 1.607480000000  | -3.508063000000 | -1.020710000000 |
| C  | 2.731661000000  | -2.766726000000 | -1.091873000000 |
| H  | -4.793706000000 | 0.961124000000  | -0.758989000000 |
| H  | -4.640590000000 | -1.547893000000 | -0.687114000000 |

---

## SUPPORTING INFORMATION

---

|   |                 |                 |                 |
|---|-----------------|-----------------|-----------------|
| H | -3.216035000000 | -3.558363000000 | -0.981619000000 |
| H | -0.959149000000 | -4.641969000000 | -1.287622000000 |
| H | 1.483789000000  | -4.452625000000 | -1.571450000000 |
| H | 3.586273000000  | -3.062463000000 | -1.719341000000 |
| C | 0.856635000000  | 0.402515000000  | 3.268877000000  |
| O | 0.425221000000  | 0.181508000000  | 1.932720000000  |
| C | 0.058945000000  | 0.029591000000  | -3.402284000000 |
| O | 0.000000000000  | 0.000000000000  | -1.987696000000 |
| C | 0.861332000000  | 1.918956000000  | 3.526976000000  |
| H | -0.153056000000 | 2.339512000000  | 3.371296000000  |
| H | 1.181489000000  | 2.158357000000  | 4.561082000000  |
| H | 1.557409000000  | 2.425448000000  | 2.826793000000  |
| C | 2.273722000000  | -0.177124000000 | 3.420351000000  |
| H | 2.661881000000  | -0.047263000000 | 4.450598000000  |
| H | 2.272560000000  | -1.260027000000 | 3.182457000000  |
| H | 2.973330000000  | 0.330910000000  | 2.724688000000  |
| C | -0.127642000000 | -0.311158000000 | 4.209884000000  |
| H | -1.151895000000 | 0.090038000000  | 4.067724000000  |
| H | -0.146689000000 | -1.397709000000 | 3.988062000000  |
| H | 0.152189000000  | -0.178556000000 | 5.274433000000  |
| C | -0.338222000000 | 1.440663000000  | -3.868974000000 |
| H | -0.315055000000 | 1.535003000000  | -4.973640000000 |
| H | -1.361913000000 | 1.682492000000  | -3.517530000000 |
| H | 0.359492000000  | 2.187867000000  | -3.438751000000 |
| C | -0.926669000000 | -1.024317000000 | -3.936445000000 |
| H | -0.941523000000 | -1.056028000000 | -5.044744000000 |
| H | -0.644397000000 | -2.029349000000 | -3.561180000000 |
| H | -1.952107000000 | -0.798623000000 | -3.578412000000 |
| C | 1.497924000000  | -0.301216000000 | -3.832839000000 |
| H | 2.201752000000  | 0.445760000000  | -3.413511000000 |
| H | 1.786268000000  | -1.299768000000 | -3.445594000000 |
| H | 1.607902000000  | -0.307603000000 | -4.936161000000 |

---

### $2_{\text{OSiPh}_3}$

---

|    |                 |                 |                 |
|----|-----------------|-----------------|-----------------|
| Dy | 0.000000000000  | 0.000000000000  | 0.000000000000  |
| Si | -0.650218000000 | -1.030599000000 | 3.159793000000  |
| Si | 0.947021000000  | 1.333177000000  | -3.229795000000 |
| O  | 0.000000000000  | 0.000000000000  | 2.028960000000  |
| O  | 0.618643000000  | 0.987199000000  | -1.649379000000 |
| S  | -2.831971000000 | 0.661037000000  | -0.569392000000 |
| S  | -0.923705000000 | 2.870723000000  | 0.825684000000  |
| S  | 2.250391000000  | 2.525189000000  | 0.842844000000  |
| S  | 2.920014000000  | -0.381009000000 | 0.428253000000  |
| C  | -3.141352000000 | 2.382953000000  | -0.703927000000 |
| C  | -2.364639000000 | 3.295180000000  | -0.086159000000 |
| C  | 0.160220000000  | 4.105125000000  | 0.182538000000  |
| C  | 1.498613000000  | 3.940425000000  | 0.141181000000  |
| C  | 3.455123000000  | 2.110929000000  | -0.365007000000 |
| C  | 3.782478000000  | 0.812988000000  | -0.534601000000 |
| H  | -4.066848000000 | 2.665586000000  | -1.228228000000 |
| H  | -2.636881000000 | 4.363415000000  | -0.104767000000 |
| H  | -0.311858000000 | 5.042433000000  | -0.151940000000 |
| H  | 2.161056000000  | 4.720706000000  | -0.262995000000 |
| H  | 3.926041000000  | 2.918624000000  | -0.945668000000 |
| H  | 4.556047000000  | 0.467863000000  | -1.234259000000 |
| S  | -1.752662000000 | -2.032737000000 | -1.096201000000 |

---

## SUPPORTING INFORMATION

---

|   |                 |                 |                 |
|---|-----------------|-----------------|-----------------|
| S | 0.994627000000  | -2.891168000000 | 0.223022000000  |
| C | -2.819496000000 | 0.110755000000  | -2.249797000000 |
| C | -2.306656000000 | -1.112813000000 | -2.497969000000 |
| C | -0.829596000000 | -3.368146000000 | -1.749732000000 |
| C | 0.309314000000  | -3.766038000000 | -1.146287000000 |
| C | 2.702407000000  | -2.993081000000 | -0.212705000000 |
| C | 3.508762000000  | -1.911696000000 | -0.167033000000 |
| H | -3.216017000000 | 0.779106000000  | -3.028282000000 |
| H | -2.243462000000 | -1.557240000000 | -3.500700000000 |
| H | -1.291506000000 | -3.939434000000 | -2.569494000000 |
| H | 0.832480000000  | -4.683952000000 | -1.456787000000 |
| H | 3.086281000000  | -3.995080000000 | -0.458623000000 |
| H | 4.585041000000  | -1.986835000000 | -0.387778000000 |
| C | -1.426935000000 | 0.001707000000  | 4.519350000000  |
| C | -2.321557000000 | -0.557370000000 | 5.460127000000  |
| H | -2.581577000000 | -1.627481000000 | 5.404116000000  |
| C | -2.897149000000 | 0.236526000000  | 6.464455000000  |
| H | -3.591834000000 | -0.211829000000 | 7.191276000000  |
| C | -2.588199000000 | 1.606299000000  | 6.539147000000  |
| H | -3.040209000000 | 2.229807000000  | 7.325812000000  |
| C | -1.703398000000 | 2.178283000000  | 5.609310000000  |
| H | -1.461245000000 | 3.250836000000  | 5.667758000000  |
| C | -1.127142000000 | 1.380173000000  | 4.607370000000  |
| H | -0.433133000000 | 1.826735000000  | 3.877059000000  |
| C | 0.712412000000  | -2.209837000000 | 3.713821000000  |
| C | 0.447568000000  | -3.440013000000 | 4.358167000000  |
| H | -0.586477000000 | -3.710627000000 | 4.626920000000  |
| C | 1.486757000000  | -4.336513000000 | 4.657663000000  |
| H | 1.261896000000  | -5.291561000000 | 5.157038000000  |
| C | 2.813517000000  | -4.016664000000 | 4.319667000000  |
| H | 3.626034000000  | -4.722611000000 | 4.550539000000  |
| C | 3.099586000000  | -2.786150000000 | 3.704581000000  |
| H | 4.139313000000  | -2.517879000000 | 3.460077000000  |
| C | 2.056743000000  | -1.892069000000 | 3.412717000000  |
| H | 2.286030000000  | -0.918694000000 | 2.952733000000  |
| C | -2.022489000000 | -2.064198000000 | 2.336854000000  |
| C | -3.272173000000 | -1.451771000000 | 2.078265000000  |
| H | -3.446917000000 | -0.417859000000 | 2.419500000000  |
| C | -4.302470000000 | -2.143570000000 | 1.419449000000  |
| H | -5.266667000000 | -1.646636000000 | 1.232029000000  |
| C | -4.107963000000 | -3.475887000000 | 1.016688000000  |
| H | -4.918297000000 | -4.023630000000 | 0.511892000000  |
| C | -2.878908000000 | -4.108275000000 | 1.270073000000  |
| H | -2.724896000000 | -5.155545000000 | 0.967496000000  |
| C | -1.848212000000 | -3.406735000000 | 1.920007000000  |
| H | -0.897010000000 | -3.919685000000 | 2.130776000000  |
| C | 1.571544000000  | -0.232534000000 | -4.074026000000 |
| C | 1.694952000000  | -1.430729000000 | -3.341278000000 |
| H | 1.416716000000  | -1.437755000000 | -2.275821000000 |
| C | 2.180765000000  | -2.605142000000 | -3.937425000000 |
| H | 2.279309000000  | -3.526592000000 | -3.343280000000 |
| C | 2.548909000000  | -2.600290000000 | -5.292851000000 |
| H | 2.931295000000  | -3.517663000000 | -5.765914000000 |
| C | 2.433765000000  | -1.416272000000 | -6.043228000000 |
| H | 2.725662000000  | -1.407497000000 | -7.104547000000 |

---

## SUPPORTING INFORMATION

---

|   |                |                |                |
|---|----------------|----------------|----------------|
| C | 1.95441000000  | -0.24411800000 | -5.43651500000 |
| H | 1.88745900000  | 0.68097000000  | -6.03265200000 |
| C | 2.29328100000  | 2.65198400000  | -3.37571300000 |
| C | 3.62946100000  | 2.27362500000  | -3.64606100000 |
| H | 3.85858600000  | 1.21920200000  | -3.86874000000 |
| C | 4.67247800000  | 3.21415400000  | -3.62435600000 |
| H | 5.70534800000  | 2.89732600000  | -3.83648300000 |
| C | 4.39575000000  | 4.56281000000  | -3.33785100000 |
| H | 5.20973600000  | 5.30350500000  | -3.32083000000 |
| C | 3.07029500000  | 4.96514500000  | -3.09705900000 |
| H | 2.84478600000  | 6.02517300000  | -2.90116500000 |
| C | 2.03280200000  | 4.01760200000  | -3.12136200000 |
| H | 1.00117600000  | 4.35415800000  | -2.93892700000 |
| C | -0.67483900000 | 1.89850100000  | -4.01821000000 |
| C | -1.39420500000 | 2.96775900000  | -3.43656300000 |
| H | -0.97664700000 | 3.48956800000  | -2.56142200000 |
| C | -2.65035900000 | 3.35656800000  | -3.92968200000 |
| H | -3.18794700000 | 4.20064900000  | -3.47002200000 |
| C | -3.22295900000 | 2.66575200000  | -5.01256500000 |
| H | -4.20774100000 | 2.96594000000  | -5.40204100000 |
| C | -2.52557700000 | 1.59609700000  | -5.60286400000 |
| H | -2.96811800000 | 1.05503500000  | -6.45345100000 |
| C | -1.26242800000 | 1.22314900000  | -5.11192000000 |
| H | -0.72962100000 | 0.37947000000  | -5.57885700000 |

---

## Input Files

### DFT Optimisation

```
!BP86 def2-svp D3BJ opt numfreq slowconv
```

```
%pal
```

```
nprocs 32
```

```
end
```

```
%basis
```

```
newGTO O "def2-TZVP" end
```

```
newGTO Se "def2-TZVP" end
```

```
newGTO Cl "def2-TZVP" end
```

```
newgto Dy
```

```
0 6
```

```
1 1205955.486947000027 0.008165729207
```

```
2 535980.216420999961 -0.004019299653
```

```
3 238213.429520000005 0.016042861724
```

```
4 105872.635341999994 0.006534642408
```

```
5 47054.504596999999 0.032501357805
```

```
6 20913.113153999999 0.044343203836
```

```
0 1
```

```
7 9294.716957000001 1.000000000000
```

```
0 1
```

```
8 4130.985314000000 1.000000000000
```

```
0 1
```

## SUPPORTING INFORMATION

9 1835.993473000000 1.000000000000  
0 1  
10 815.997099000000 1.000000000000  
0 1  
11 362.665377000000 1.000000000000  
0 1  
12 161.184612000000 1.000000000000  
0 1  
13 71.637605000000 1.000000000000  
0 1  
14 31.838936000000 1.000000000000  
0 1  
15 14.150638000000 1.000000000000  
0 1  
16 6.289172000000 1.000000000000  
0 1  
17 2.795188000000 1.000000000000  
0 1  
18 1.242306000000 1.000000000000  
0 1  
19 0.552136000000 1.000000000000  
0 1  
20 0.245394000000 1.000000000000  
0 1  
21 0.109064000000 1.000000000000  
0 1  
22 0.048473000000 1.000000000000  
0 1  
23 0.021543000000 1.000000000000  
1 5  
1 16500.520027999999 0.004760264705  
2 6600.208011000000 0.005897483480  
3 2640.083204000000 0.029326527847  
4 1056.033282000000 0.089161858001  
5 422.413313000000 0.265122289728  
1 1  
6 168.965325000000 1.000000000000  
1 1  
7 67.586130000000 1.000000000000  
1 1  
8 27.034452000000 1.000000000000  
1 1  
9 10.813781000000 1.000000000000  
1 1  
10 4.325512000000 1.000000000000  
1 1  
11 1.730205000000 1.000000000000  
1 1  
12 0.692082000000 1.000000000000  
1 1  
13 0.276833000000 1.000000000000  
1 1  
14 0.110733000000 1.000000000000  
1 1  
15 0.044293000000 1.000000000000  
1 1  
16 0.017717000000 1.000000000000  
2 4  
1 1185.048662000000 0.004734300415  
2 430.926786000000 0.026490774838



## SUPPORTING INFORMATION

```
3 156.700650000000 0.145474353692
4 56.982054000000 0.463452784138
2 1
5 20.720747000000 1.000000000000
2 1
6 7.534817000000 1.000000000000
2 1
7 2.739933000000 1.000000000000
2 1
8 0.996339000000 1.000000000000
2 1
9 0.362305000000 1.000000000000
2 1
10 0.131747000000 1.000000000000
2 1
11 0.047908000000 1.000000000000
2 1
12 0.017421000000 1.000000000000
3 4
1 33.836944000000 0.101241740066
2 11.278981000000 0.330021330584
3 3.759660000000 0.494377985697
4 1.253220000000 0.347706969111
3 1
5 0.417740000000 0.145206846483
3 1
6 0.139247000000 1.000000000000
end
end
```

```
%scf
maxiter 8000
end
```

```
%scf
directresetfreq 1
diismaxeq 25
end
```

```
%method
SpecialGridAtoms 66
SpecialGridIntAcc 9
end
```

```
*xyz 1 6
Coordinates
*
```

**EDA**

```
#!/bin/sh
```

```
# dependency: D:/ADF_DATA/Dy-crown/O4Se2/DyO4Se2C12.Region_1
DyO4Se2C12.Region_1.results/adf.rkf Region_1.rkf
# dependency: D:/ADF_DATA/Dy-crown/O4Se2/DyO4Se2C12.Region_2
DyO4Se2C12.Region_2.results/adf.rkf Region_2.rkf
```

```
"$AMSBIN/ams" -n 12 << eor
```

# SUPPORTING INFORMATION

Task SinglePoint

System

Atoms

Dy 0.0 0.0 0.0 region=Region\_1 adf.f=Region\_1  
Cl 0.0 0.0 2.544938 region=Region\_1 adf.f=Region\_1  
Cl -0.456727 0.128008 -2.495154 region=Region\_1 adf.f=Region\_1  
Se -3.326147 -0.105112 0.433413 region=Region\_2 adf.f=Region\_2  
Se -1.750915 2.825753 0.385092 region=Region\_2 adf.f=Region\_2  
Se 1.567185 2.932135 0.192987 region=Region\_2 adf.f=Region\_2  
Se 3.313157 0.102861 0.071358 region=Region\_2 adf.f=Region\_2  
C -3.935339 1.326733 -0.656815 region=Region\_2 adf.f=Region\_2  
C -3.297071 2.513961 -0.675809 region=Region\_2 adf.f=Region\_2  
C -0.867951 4.031686 -0.789529 region=Region\_2 adf.f=Region\_2  
C 0.476742 4.074136 -0.869073 region=Region\_2 adf.f=Region\_2  
C 2.99537 2.703486 -1.044171 region=Region\_2 adf.f=Region\_2  
C 3.702658 1.557514 -1.094199 region=Region\_2 adf.f=Region\_2  
H -4.848661 1.145611 -1.244907 region=Region\_2 adf.f=Region\_2  
H -3.659308 3.361084 -1.279292 region=Region\_2 adf.f=Region\_2  
H -1.508886 4.712617 -1.371362 region=Region\_2 adf.f=Region\_2  
H 1.00278 4.793832 -1.515894 region=Region\_2 adf.f=Region\_2  
H 3.238444 3.568345 -1.681409 region=Region\_2 adf.f=Region\_2  
H 4.559909 1.427178 -1.773303 region=Region\_2 adf.f=Region\_2  
Se -1.569922 -2.922757 0.317363 region=Region\_2 adf.f=Region\_2  
Se 1.74677 -2.832496 0.159832 region=Region\_2 adf.f=Region\_2  
C -3.834321 -1.538113 -0.706399 region=Region\_2 adf.f=Region\_2  
C -3.122134 -2.681823 -0.754071 region=Region\_2 adf.f=Region\_2  
C -0.60736 -4.067966 -0.857662 region=Region\_2 adf.f=Region\_2  
C 0.738327 -4.03165 -0.922116 region=Region\_2 adf.f=Region\_2  
C 3.172361 -2.506817 -1.059651 region=Region\_2 adf.f=Region\_2  
C 3.805878 -1.318078 -1.096578 region=Region\_2 adf.f=Region\_2  
H -4.751747 -1.396963 -1.299024 region=Region\_2 adf.f=Region\_2  
H -3.423622 -3.532851 -1.384718 region=Region\_2 adf.f=Region\_2  
H -1.201806 -4.78637 -1.443857 region=Region\_2 adf.f=Region\_2  
H 1.313318 -4.71919 -1.562299 region=Region\_2 adf.f=Region\_2  
H 3.479377 -3.352543 -1.695069 region=Region\_2 adf.f=Region\_2  
H 4.662288 -1.131476 -1.76358 region=Region\_2 adf.f=Region\_2

End

Charge 1.0

BondOrders

1 2 1.0  
1 3 1.0  
1 4 1.0  
1 5 1.0  
1 6 1.0  
1 7 1.0  
1 20 1.0  
1 21 1.0  
4 8 1.0  
4 22 1.0  
5 9 1.0  
5 10 1.0  
6 11 1.0  
6 12 1.0  
7 13 1.0  
7 27 1.0  
8 9 2.0

## SUPPORTING INFORMATION

8 14 1.0  
9 15 1.0  
10 11 2.0  
10 16 1.0  
11 17 1.0  
12 13 2.0  
12 18 1.0  
13 19 1.0  
20 23 1.0  
20 24 1.0  
21 25 1.0  
21 26 1.0  
22 23 2.0  
22 28 1.0  
23 29 1.0  
24 25 2.0  
24 30 1.0  
25 31 1.0  
26 27 2.0  
26 32 1.0  
27 33 1.0

End

End

Engine ADF

Basis

Type DZP

Core None

PerAtomType Symbol=Dy File=ZORA/TZP/Dy

PerAtomType Symbol=Cl File=ZORA/DZP/Cl

PerAtomType Symbol=Se File=ZORA/DZP/Se

PerAtomType Symbol=C File=ZORA/DZP/C

PerAtomType Symbol=H File=ZORA/DZP/H

End

SpinPolarization 5.0

Fragments

Region\_1 =/home/netweb/Dy-crown/O4Se2/DyO4Se2Cl2.Region\_1/ams.results/adf.rkf

Region\_2 =/home/netweb/Dy-crown/O4Se2/DyO4Se2Cl2.Region\_2/ams.results/adf.rkf

End

Save TAPE15

Print ETSLOWDIN-Unrestricted

Print NOCVHIRSHFELD

XC

Hybrid PBE0

DISPERSION GRIMME3 BJDAMP

End

Symmetry NOSYM

Unrestricted Yes

BeckeGrid

Quality Good

End

LOCORB

END

NumericalQuality Good

FullFock Yes

## SUPPORTING INFORMATION

```
AOMat2File Yes
  SCF
  DIIS
  N 15
  Cyc 20
  End
  Mixing 0.015
  Mixing1 0.09
  Iterations 1000
End
UnrestrictedFragments Yes
ETSNOCV
  Enabled Yes
End
EndEngine
eor

# =====
# NBO Analysis
# =====

cp "${AMS_RESULTSDIR}-${AMS_JOBNAME-ams}.results}/adf.rkf" TAPE21
cp "${AMS_RESULTSDIR}-${AMS_JOBNAME-ams}.results}/TAPE15" TAPE15
"${AMSBIN/adfnbo}" << eor
write
spherical
eor

"${AMSBIN/gennbo6}" FILE47

"${AMSBIN/adfnbo}" << eor
spherical
fock
read
eor

mv TAPE21 "${AMS_RESULTSDIR}-${AMS_JOBNAME-ams}.results}/adf.rkf"
rm -f TAPE15

CASSCF

!DKH2 DKH-def2-svp slowconv tightscf autoaux nofrozencore
!moread
%moinp " OSe-Cl-c.gbw"

%pal nprocs 12
end

%Maxcore 6000

%basis
newGTO O "DKH-def2-TZVP" end
newGTO Se "DKH-def2-TZVP" end
newGTO Cl "DKH-def2-TZVP" end
newgto Dy
```

## SUPPORTING INFORMATION

0 6  
1 1205955.486947000027 0.008165729207  
2 535980.216420999961 -0.004019299653  
3 238213.429520000005 0.016042861724  
4 105872.635341999994 0.006534642408  
5 47054.504596999999 0.032501357805  
6 20913.113153999999 0.044343203836  
0 1  
7 9294.716957000001 1.000000000000  
0 1  
8 4130.985314000000 1.000000000000  
0 1  
9 1835.993473000000 1.000000000000  
0 1  
10 815.997099000000 1.000000000000  
0 1  
11 362.665377000000 1.000000000000  
0 1  
12 161.184612000000 1.000000000000  
0 1  
13 71.637605000000 1.000000000000  
0 1  
14 31.838936000000 1.000000000000  
0 1  
15 14.150638000000 1.000000000000  
0 1  
16 6.289172000000 1.000000000000  
0 1  
17 2.795188000000 1.000000000000  
0 1  
18 1.242306000000 1.000000000000  
0 1  
19 0.552136000000 1.000000000000  
0 1  
20 0.245394000000 1.000000000000  
0 1  
21 0.109064000000 1.000000000000  
0 1  
22 0.048473000000 1.000000000000  
0 1  
23 0.021543000000 1.000000000000  
1 5  
1 16500.520027999999 0.004760264705  
2 6600.208011000000 0.005897483480  
3 2640.083204000000 0.029326527847  
4 1056.033282000000 0.089161858001  
5 422.413313000000 0.265122289728  
1 1  
6 168.965325000000 1.000000000000  
1 1  
7 67.586130000000 1.000000000000  
1 1  
8 27.034452000000 1.000000000000  
1 1  
9 10.813781000000 1.000000000000  
1 1

## SUPPORTING INFORMATION

```
10 4.325512000000 1.000000000000
1 1
11 1.730205000000 1.000000000000
1 1
12 0.692082000000 1.000000000000
1 1
13 0.276833000000 1.000000000000
1 1
14 0.110733000000 1.000000000000
1 1
15 0.044293000000 1.000000000000
1 1
16 0.017717000000 1.000000000000
2 4
1 1185.048662000000 0.004734300415
2 430.926786000000 0.026490774838
3 156.700650000000 0.145474353692
4 56.982054000000 0.463452784138
2 1
5 20.720747000000 1.000000000000
2 1
6 7.534817000000 1.000000000000
2 1
7 2.739933000000 1.000000000000
2 1
8 0.996339000000 1.000000000000
2 1
9 0.362305000000 1.000000000000
2 1
10 0.131747000000 1.000000000000
2 1
11 0.047908000000 1.000000000000
2 1
12 0.017421000000 1.000000000000
3 4
1 33.836944000000 0.101241740066
2 11.278981000000 0.330021330584
3 3.759660000000 0.494377985697
4 1.253220000000 0.347706969111
3 1
5 0.417740000000 0.145206846483
3 1
6 0.139247000000 1.000000000000
end
end

%method
SpecialGridAtoms 66
SpecialGridIntAcc 9
end

%casscf
nel 9
norb 7
mult 6,4
nroots 21,224
```

## SUPPORTING INFORMATION

```
actorbs forbs
maxiter 100
ci
nguessmat 8000
maxiter 100
end

rel
dosoc true
gtensor true
printlevel 3
NDoubGTensor 8
domagnetization true
dosusceptibility true
end

ANISO
doaniso true
MLTP 2,2,2,2,2,2,2
TINT 0, 300, 100
HINT 0, 7.0, 10
TMAG 2.0, 3.0, 5.0
CRYIS_element "Dy"
CRYIS_charge 3
PLOT true
UBAR true
end
end

*xyz 1 6
Coordinates
*
```

## References

- 1 F. Neese, *WIREs Comput. Mol. Sci.*, 2022, **12**, e1606.
- 2 A. D. Becke, *J. Chem. Phys.*, 1993, **98**, 5648–5652.
- 3 J. P. Perdew, J. Tao, V. N. Staroverov and G. E. Scuseria, *J. Chem. Phys.*, 2004, **120**, 6898–6911.
- 4 S. Grimme, S. Ehrlich and L. Goerigk, *J. Comput. Chem.*, 2011, **32**, 1456–1465.
- 5 D. Aravena, M. Atanasov and F. Neese, *Inorg. Chem.*, 2016, **55**, 4457–4469.
- 6 I. Tarannum, S. Moorthy and S. K. Singh, *Dalton Trans.*, 2023, **52**, 15576–15589.
- 7 S. K. Singh, C. J. Cramer and L. Gagliardi, *Inorg. Chem.*, 2020, **59**, 6815–6825.
- 8 D. Ray, M. S. Oakley, A. Sarkar, X. Bai and L. Gagliardi, *Inorg. Chem.*, 2023, **62**, 1649–1658.
- 9 T. Noro, M. Sekiya and T. Koga, *Theor. Chem. Acc.*, 2012, **131**, 1124.
- 10 F. Weigend and R. Ahlrichs, *Phys. Chem. Chem. Phys.*, 2005, **7**, 3297–3305.
- 11 P. Pracht, F. Bohle and S. Grimme, *Phys. Chem. Chem. Phys.*, 2020, **22**, 7169–7192.
- 12 C. Adamo and V. Barone, *J. Chem. Phys.*, 1999, **110**, 6158–6170.

## SUPPORTING INFORMATION

- 13E. D. Glendening, C. R. Landis and F. Weinhold, *J. Comput. Chem.*, 2013, **34**, 1429–1437.
- 14B. O. Roos, P. R. Taylor and P. E. M. Sigbahn, *Chem. Phys.*, 1980, **48**, 157–173.
- 15D. A. Pantazis and F. Neese, *J. Chem. Theory Comput.*, 2009, **5**, 2229–2238.
- 16M. Atanasov, D. Ganyushin, K. Sivalingam and F. Neese, in *Molecular Electronic Structures of Transition Metal Complexes II*, eds. D. M. P. Mingos, P. Day and J. P. Dahl, Springer, Berlin, Heidelberg, 2012, pp. 149–220.
- 17D. Aravena, *J. Phys. Chem. Lett.*, 2018, **9**, 5327–5333.
- 18A. Castro-Alvarez, Y. Gil, L. Llanos and D. Aravena, *Inorg. Chem. Front.*, 2020, **7**, 2478–2486.
- 19L. Ungur, M. Thewissen, J.-P. Costes, W. Wernsdorfer and L. F. Chibotaru, *Inorg. Chem.*, 2013, **52**, 6328–6337.
- 20A. B. Canaj, S. Dey, E. R. Martí, C. Wilson, G. Rajaraman and M. Murrie, *Angew. Chem. Int. Ed.*, 2019, **58**, 14146–14151.
- 21Z.-H. Li, Y.-Q. Zhai, W.-P. Chen, Y.-S. Ding and Y.-Z. Zheng, *Chem. – Eur. J.*, 2019, **25**, 16219–16224.
- [22] Z. Zhu, C. Zhao, Q. Zhou, S. Liu, X.-L. Li, A. Mansikkam, J. Tang, *CCS Chem.* **2022**, *4*, 3762–3771.
- 23S. Liu, Y. Gil, C. Zhao, J. Wu, Z. Zhu, X.-L. Li, D. Aravena and J. Tang, *Inorg. Chem. Front.*, 2022, **9**, 4982–4989.
- 24X.-L. Ding, Y.-Q. Zhai, T. Han, W.-P. Chen, Y.-S. Ding and Y.-Z. Zheng, *Chem. – Eur. J.*, 2021, **27**, 2623–2627.
- 25Y. Ding, N. F. Chilton, R. E. P. Winpenny and Y. Zheng, *Angew. Chem. Int. Ed.*, 2016, **55**, 16071–16074.
- 26L. Maxwell, M. Amoza and E. Ruiz, *Inorg. Chem.*, 2018, **57**, 13225–13234.
- 27P. Kalita, N. Ahmed, S. Moorthy, V. Béreau, A. K. Bar, P. Kumar, P. Nayak, J.-P. Sutter, S. K. Singh and V. Chandrasekhar, *Dalton Trans.*, 2023, **52**, 2804–2815.
- 28X. Ding, Y. Zhai, T. Han, W. Chen, Y. Ding and Y. Zheng, *Chem. – Eur. J.*, 2021, **27**, 2623–2627.
- 29X. Meng, M. Wang, X. Gou, W. Lan, K. Jia, Y.-X. Wang, Y.-Q. Zhang, W. Shi and P. Cheng, *Inorg. Chem. Front.*, 2021, **8**, 2349–2355.
- 30S. Bala, G.-Z. Huang, Z.-Y. Ruan, S.-G. Wu, Y. Liu, L.-F. Wang, J.-L. Liu and M.-L. Tong, *Chem. Commun.*, 2019, **55**, 9939–9942.
- 31Y.-S. Ding, W. J. A. Blackmore, Y.-Q. Zhai, M. J. Giansiracusa, D. Reta, I. Vitorica-Yrezabal, R. E. P. Winpenny, N. F. Chilton and Y.-Z. Zheng, *Inorg. Chem.*, 2022, **61**, 227–235.
- 32A. B. Canaj, S. Dey, E. R. Martí, C. Wilson, G. Rajaraman and M. Murrie, *Angew. Chem. Int. Ed.*, 2019, **58**, 14146–14151.
- 33Z. Zhu, C. Zhao, T. Feng, X. Liu, X. Ying, X.-L. Li, Y.-Q. Zhang and J. Tang, *J. Am. Chem. Soc.*, 2021, **143**, 10077–10082.
- 34S.-D. Jiang, B.-W. Wang, G. Su, Z.-M. Wang and S. Gao, *Angew. Chem. Int. Ed.*, 2010, **49**, 7448–7451.
- 35Y. Wang, X.-L. Li, T.-W. Wang, Y. Song and X.-Z. You, *Inorg. Chem.*, 2010, **49**, 969–976.
